# Supplementary material for: Evolutionary origins and diversification of testis-specific short histone H2A variants in mammals
Source: HighWire-hosted journal article supplement (doi:10.1101/gr.229799.117), 2018-03-16
Supplement: Supplemental_Data_S1.docx [file Supplemental_Data_S1.docx]

>Rat_H2A.X

---SRSSRAGLQFPVGRVHRLLR-KGHYAER-VGAGAPVYLAAVLEYLTAEILELAGNAARDNK-KTRIIPRHLQLAIRNDEELNKLL--------------------

>Pig_H2A.X

---SRSSRAGLQFPVGRVHRLLR-KGHYAER-VGAGAPVYLAAVLEYLTAEILELAGNAARDNK-KTRIIPRHLQLAIRNDEELNKLL--------------------

>Marmoset_H2A.X

---SRSSRAGLQFPVGRVHRLLR-KGHYAER-VGAGAPVYLAAVLEYLTAEILELAGNAARDNK-KTRIIPRHLQLAIRNDEELNKLL--------------------

>Chimp_H2A.X

---SRSSRAGLQFPVGRVHRLLR-KGHYAER-VGAGAPVYLAAVLEYLTAEILELAGNAARDNK-KTRIIPRHLQLAIRNDEELNKLL--------------------

>Baboon_H2A.X

---SRSSRAGLQFPVGRVHRLLR-KGHYAER-VGAGAPVYLAAVLEYLTAEILELAGNAARDNK-KTRIIPRHLQLAIRNDEELNKLL--------------------

>Armadillo_H2A.X

---SRSSRAGLQFPVGRVHRLLR-KGHYAER-VGAGAPVYLAAVLEYLTAEILELAGNAARDNK-KTRIIPRHLQLAIRNDEELNKLL--------------------

>Mouse_H2A.X

---SRSSRAGLQFPVGRVHRLLR-KGHYAER-VGAGAPVYLAAVLEYLTAEILELAGNAARDNK-KTRIIPRHLQLAIRNDEELNKLL--------------------

>Platyous_H2A.X

---SRSSRAGLQFPVGRVHRLLR-KGHYAER-VGAGAPVYLAAVLEYLTAEILELAGNAARDNK-KTRIIPRHLQLAIRNDEELNKLL--------------------

>Human_H2A.X

---SRSSRAGLQFPVGRVHRLLR-KGHYAER-VGAGAPVYLAAVLEYLTAEILELAGNAARDNK-KTRIIPRHLQLAIRNDEELNKLL--------------------

>TasDev_H2A.X

---SRSSRAGLQFPVGRVHRLLR-KGHYAER-VGAGAPVYLAAVLEYLTAEILELAGNAARDNK-KTRIIPRHLQLAIRNDEELNKLL--------------------

>Chicken_H2A.X

---SRSSRAGLQFPVGRVHRLLR-RGHYAER-VGAGAPVYLAAVLEYLTAEILELAGNAARDNK-KTRIIPRHLQLAVRNDEELNKLL--------------------

>Platypus_H2A

---SRSSRAGLQFPVGRVHRLLR-KGNYAER-VGAGAPVYLAAVLEYLTAEILELAGNAARDNK-KTRIIPRHLQLAIRNDEELNKLLGKVTIAQGGVLPNIQAVLLP

>Chicken_H2A

---SRSSRAGLQFPVGRVHRLLR-KGNYAER-VGAGAPVYMAAVLEYLTAEILELAGNAARDNK-KTRIIPRHLQLAIRNDEELNKLLGKVTIAQGGVLPNIQAVLLP

>Human_H2A

---SRSSRAGLQFPVGRVHRLLR-KGNYAER-VGAGAPVYLAAVLEYLTAEILELAGNAARDNK-KTRIIPRHLQLAIRNDEELNKLLGKVTIAQGGVLPNIQAVLLP

>Rat_H2A

---SRSSRAGLQFPVGRVHRLLR-KGNYAER-VGAGAPVYLAAVLEYLTAEILELAGNAARDNK-KTRIIPRHLQLAIRNDEELNKLLGKVTIAQGGVLPNIQAVLLP

>TasDev_H2A

---SRSSRAGLQFPVGRVHRLLR-KGNYAER-VGAGAPVYLAAVLEYLSAEILELAGNAARDNK-KTRIIPRHLQLAIRNDEELNKLLGGVTIAQGGVLPNIQAVLLP

>Mouse_H2A

---SRSSRAGLQFPVGRVHRLLR-KGNYAER-VGAGAPVYLAAVLEYLTAEILELAGNAARDNK-KTRIIPRHLQLAIRNDEELNKLLGRVTIAQGGVLPNIQAVLLP

>Xenopus_H2A.X

---TRSSRAGLQFPVGRVHRLLR-KGNYAHR-VGAGAPVYLAAVLEYLTAEILELAGNAARDNK-KSRIIPRHLQLAVRNDEELNKLL--------------------

>Xenopus_H2A

---TRSSRAGLQFPVGRVHRLLR-KGNYAER-VGAGAPVYLAAVLEYLTAEILELAGNAARDNK-KTRIIPRHLQLAVRNDEELNKLLGGVTIAQGGVLPNIQSVLLP

>Armadillo_H2A

---TRSSRAGLQFPVGRVHRLLR-KGNYSER-VGAGAPVYLAAVLEYLTAEILELAGNAARDNK-KTRIIPRHLQLAIRNDEELNKLLGKVTIAQGGVLPNIQAVLLP

>Baboon_H2A

---TRSSRAGLQFPVGRVHRLLR-KGNYSER-VGAGAPVYLAAVLEYLTAEILELAGNAARDNK-KTRIIPRHLQLAIRNDEELNKLLGKVTIAQGGVLPNIQAVLLP

>Pig_H2A

---TRSSRAGLQFPVGRVHRLLR-KGNYAER-VGAGAPVYLAAVLEYLTAEILELAGNAARDNK-KTRIIPRHLQLAIRNDEELNKLLGKVTIAQGGVLPNIQAVLLP

>Chimp_H2A

---TRSSRAGLQFPVGRVHRLLR-KGNYAER-VGAGAPVYLAAVLEYLTAEILELAGNAARDNK-KTRIIPRHLQLAIRNDEELNKLLGKVTIAQGGVLPNIQAVLLP

>Marmoset_H2A

---SRSSRAGLQFPVGRIHRLLR-KGKYADR-IGAGAPVYLAAVLEYLTAEILELAGNASRDNK-KTRIIPRHLQLAIRNDEELNKLLGGVTIAQGGVLPNIQAVLLP

>Platypus_H2A.Z

---SRSQRAGLQFPVGRIHRHLKTRTTSHGR-VGATAAVYSAAILEYLTAEVLELAGNASKDLK-VKRITPRHLQLAIRGDEELDSLIK-ATIAGGGVIP--------

>TasDev_H2A.Z

---SRSQRAGLQFPVGRIHRHLKTRTTSHGR-VGATAAVYSAAILEYLTAEVLELAGNASKDLK-VKRITPRHLQLAIRGDEELDSLIK-ATIAGGGVIP--------

>Chicken_H2A.Z

---SRSQRAGLQFPVGRIHRHLKSRTTSHGR-VGATAAVYSAAILEYLTAEVLELAGNASKDLK-VKRITPRHLQLAIRGDEELDSLIK-ATIAGGGVIP--------

>Human_H2A.Z

---SRSQRAGLQFPVGRIHRHLKSRTTSHGR-VGATAAVYSAAILEYLTAEVLELAGNASKDLK-VKRITPRHLQLAIRGDEELDSLIK-ATIAGGGVIP--------

>Mouse_H2A.Z

---SRSQRAGLQFPVGRIHRHLKSRTTSHGR-VGATAAVYSAAILEYLTAEVLELAGNASKDLK-VKRITPRHLQLAIRGDEELDSLIK-ATIAGGGVIP--------

>Chimp_H2A.Z

---SRSQRAGLQFPVGRIHRHLKSRTTSHGR-VGATAAVYSAAILEYLTAEVLELAGNASKDLK-VKRITPRHLQLAIRGDEELDSLIK-ATIAGGGVIP--------

>Marmoset_H2A.Z

---SRSQRAGLQFPVGRIHRHLKSRTTSHGR-VGATAAVYSAAILEYLTAEVLELAGNASKDLK-VKRITPRHLQLAIRGDEELDSLIK-ATIAGGGVIP--------

>Baboon_H2A.Z

---SRSQRAGLQFPVGRIHRHLKSRTTSHGR-VGATAAVYSAAILEYLTAEVLELAGNASKDLK-VKRITPRHLQLAIRGDEELDSLIK-ATIAGGGVIP--------

>Pig_H2A.Z

---SRSQRAGLQFPVGRIHRHLKSRTTSHGR-VGATAAVYSAAILEYLTAEVLELAGNASKDLK-VKRITPRHLQLAIRGDEELDSLIK-ATIAGGGVIP--------

>Armadillo_H2A.Z

---SRSQRAGLQFPVGRIHRHLKSRTTSHGR-VGATAAVYSAAILEYLTAEVLELAGNASKDLK-VKRITPRHLQLAIRGDEELDSLIK-ATIAGGGVIP--------

>Rat_H2A.Z

---SRSQRAGLQFPVGRIHRHLKTRATSRGR-VGATAAVYSAAILEYLTAEVLELAGNASKDLK-VKRITPSHLQLAIRGDEELDSLIN-ATIAGGGVIP--------

>XenopusH2A.Z

---TRSSRAGLQFPVGRIHRLLKNRTTSHGR-VGGTAAVYTAAILEYLTAEVLELAGNASKDLK-VKRISPRHLQLAIRGDEELDALIK-ATIAGGGVIP--------

>TasDev_macroH2A

---SRSAKAGVIFPVGRMLRYIK-KGHPKYR-IGVGAPVYMAAVLEYLTAEILELAGNAARDNK-KGRVTPRHILLAVANDEELNQLLKG------------------

>Mouse_macroH2A

---SRSAKAGVIFPVGRMLRYIK-KGHPKYR-IGVGAPVYMAAVLEYLTAEILELAGNAARDNK-KGRVTPRHILLAVANDEELNQLLKG------------------

>Chicken_macroH2A

---SRSAKAGVIFPVGRMLRYIK-KGHPKYR-IGVGAPVYMAAVLEYLTAEILELAGNAARDNK-KGRVTPRHILLAVANDEELNQLLKG------------------

>Human_macroH2A

---SRSAKAGVIFPVGRMLRYIK-KGHPKYR-IGVGAPVYMAAVLEYLTAEILELAGNAARDNK-KGRVTPRHILLAVANDEELNQLLKG------------------

>Chimp_macroH2A

---SRSAKAGVIFPVGRMLRYIK-KGHPKYR-IGVGAPVYMAAVLEYLTAEILELAGNAARDNK-KGRVTPRHILLAVANDEELNQLLKG------------------

>Rat_macroH2A

---SRSAKAGVIFPVGRMLRYIK-KGHPKYR-IGVGAPVYMAAVLEYLTAEILELAGNAARDNK-KGRVTPRHILLAVANDEELNQLLKG------------------

>Baboon_macroH2A

---SRSAKAGVIFPVGRMLRYIK-KGHPKYR-IGVGAPVYMAAVLEYLTAEILELAGNAARDNK-KGRVTPRHILLAVANDEELNQLLKG------------------

>Marmoset_macroH2A

---SRSAKAGVIFPVGRMLRYIK-KGHPKYR-IGVGAPVYMAAVLEYLTAEILELAGNAARDNK-KGRVTPRHILLAVANDEELNQLLKG------------------

>Pig_macroH2A

---SRSAKAGVIFPVGRMLRYIK-KGHPKYR-IGVGAPVYMAAVLEYLTAEILELAGNAARDNK-KGRVTPRHILLAVANDEELNQLLKG------------------

>Xenopus_macroH2A

---TRSAKAGVIFPVGRMLRYIK-KGHPKYR-IGVGAPVYMAAVLEYLTAEILELAGNAARDNK-KSRVTPRHILLAIANDEELNQLLKG------------------

>Armadillo_macroH2A

---SRSARAGVIFPVGRLMRYLK-KGTFKYR-ISVGAPVYMAAVIEYLAAEILELAGNAARDNK-KARIAPRHILLAVANDEELNQLLKG------------------

>Platypus_macroH2A

---PGTAAAGLMGPPGRREKLER-RGTQEHR-IGVGAPWNKCAIV--FTAEILELAGNAARDNK-KARIAPRHILLAVANDEELNQLLKG------------------

>Opossum_mmH2A.1

-TRSRSSRAQLQFPVSRVDRFLR-QGHYAQR-LASGAPVFLAAVLEYLTAEILELAGNAARDNQ-KSRIAPRHVQLAVRNDAELNQLF--------------------

>TasDev_mmH2A.1

-TRSRSSRAQLQFPVSRVDRFLR-QGHYAQR-LASGAPVFLAAVLEYLTAEILELAGNAARDNQ-KSRIAPRHVQLAVRNDAELNQLF--------------------

>TasDev_mmH2A.2

-TRSRSSRAQLQFPVSRVDRFLR-QGHYAQR-LASGAPVFLAAVLEYLTAEILELAGNAARDNQ-KTRIAPCHVQLAVRNDAELNQLF--------------------

>Opossum_mmH2A.2

-IRSRSSRAQLQFPVSRVDRFLR-QGHYAQR-LASSAPVFLAAVLEYLTAEILELAGNAARDNK-KTRIAPCHVQLAVRNDVELNQLF--------------------

>Platypus_mmH2A.1

-RRSRSSRAQLRFSVSLVDRFLR-RGRYSRR-VAEGTPVFLAAVLEYLTAELLELAGHTAGAHR-RQRIAPVHLRQAVRDDPELDRLF--------------------

>Panda_H2A.B.1.1

RTRSRTARAELSFSVSHVERLLR-EGHYAQR-LGSSAPVFLAAVIQYLTAKVLELAGNEAQNSG-GRRITPQLVDMAVHNHALLSGFFGTTTISQVAPAWN-------

>Panda_H2A.B.Panda1

RTRSRTARAELSFSVSHVERLLR-EGHYAQR-LGSSAPVFLAAVIQYLTAKVLELAGNEAQNSG-GRRITPQLVDMAVHNHALLSGFFGTTTISQVAPAWN-------

>Panda_H2A.B.2

RTRSRTARAELSFSVSHVERLLR-EGHYAQR-LGSSAPVFLAAVIQYLTAKVLELAGNEAQNSG-GRRITPQLVDMAVHNHALLSGFFGTTTISQVAPAWN-------

>Rabbit_H2A.B.1.1

RARSRTARAQLTFSVSQVERRLR-QGHYAQR-LSSSASVFLAATIEFLTAKVLELAGNEAHNIG-SRRITPHLVDMAVHNHGLLSGFFGTATISQVAPGRG-------

>Pig_H2A.B.2

RTCARTTRAGLSASVSHMERLLR-EGPYAQC-LSSSARVFLAATIEYLTARVLELAGDEAQIVG-RRCITPELVAMAVHNNALLSAFFGTLAISQVAPTQE-------

>Pig_H2A.B.1.1

RTCARTTRAGLSASVSHMERLLR-EGPYAQC-LSSSARVFLAATIEYLTARVLELAGDEAQIVG-RRCITPELVAMAVHNNALLSAFFGTLAISQVAPTQE-------

>Armadillo_H2AB.1

RNRSRTSRAELSFSVSHVERLLR-EGHYAQR-LSSSAPVYLAAILEYLTATILELAGNEARNSG-MRRITPQLVDMAVHNNALLSGFFDTTTVSQVAPARE-------

>Cat_H2A.B.1.1

RVRSRTARAELTFSVSHMERLLR-EGRYSQR-LGASAPIFLAAVIQSLTAKVLELAGIEARNSG-RRLITPDVLDMVVHNHPLLSAFFQSTIISQAVPGWY-------

>Cat_H2A.B.2

RVRSRTARAELTFSVSHMERLLR-EGRYSQR-LGASAPIFLAAVIQSLTAKVLELAGIEARNSG-RRLITPDVLDMVVHNHPLLSAFFQSTIISQAVPGWY-------

>Marmoset_H2A.B.MAR4

HTRSRTARAELIFSVSKMERGLW-EGHYAQR-LSDNAPVYLAAVIQYLTAKILELAAKEADNRG-ERIITPRLLDMAVHNDGLLSTLFHAITISQVGPGPN-------

>Marmoset_H2A.B.MAR3

HTRSRTARAELIFSVSKMERGLW-EGHYAQR-LSDNAPVYLAAVIQYLTAKILELAAKEADNRG-ERIITPRLLDMAVHNDGLLSTLFHAITISQVGPGPN-------

>Marmoset_H2A.B.MAR2

HTRSRTARAELIFSVSQMERGLW-EGRYAQR-LSYNAPIYLAAVIQYLTAKILELAAEEADNNGGERIITPRLLDLVIRNDGLLNTLFRNILISQVAPGPN-------

>Marmoset_H2A.B.MAR1

HTRSRTARAELIFSVSQMERGLW-EGHYAQR-LSDNAPIYLAAVIQYLTAKILELAAEEADNNGGERIITPRLLDLVIRNDGLLSTLFRNILISQVAPGPN-------

>Baboon_H2A.B.2

QTRSRTVRAELSFSVSQVERGLR-EGHYAQR-LSPTAPVYLAAVIEYLTAKVLELAGNEAQDNG-ERTITPLLLDRAVHNNRLLSTLFDTTIISQVAPGGD-------

>Baboon_H2A.B.1.2

QTRSRTVRAELSFSVSQVERGLR-EGHYAQR-LSPTAPVYLAAVIEYLTAKVLELAGNEAQDNG-ERTITPLLLDRAVHNNRLLSTLFDTTIISQVAPGGD-------

>Baboon_H2A.B.1.1

QTRSRTVRAELSFSVSQVERGLR-EGHYAQR-LSPTAPVYLAAVIEYLTAKVLELAGNEAQDNG-ERTITPLLLDRAVHNNRLLSTLFDTTIISQVAPGGD-------

>Human_H2A.B.1.1

RTCSRTVRAELSFSVSQVERSLR-EGHYAQR-LSRTAPVYLAAVIEYLTAKVLELAGNEAQNSG-ERNITPLLLDMVVHNDRLLSTLFNTTTISQVAPGED-------

>Human_H2A.B.2

RTCSRTVRAELSFSVSQVERSLR-EGHYAQR-LSRTAPVYLAAVIEYLTAKVPELAGNEAQNSG-ERNITPLLLDMVVHNDRLLSTLFNTTTISQVAPGED-------

>Human_H2A.B.1.2

RTCSRTVRAELSFSVSQVERSLR-EGHYAQR-LSRTAPVYLAAVIEYLTAKVLELAGNEAQNSG-ERNITPLLLDMVVHNDRLLSTLFNTTTISQVAPGED-------

>Marmoset_H2A.B.1.1

HTLSRTARGELLFSVSEVERSLQ-EGQCAQR-LSPSAPVFLAAVIQYLTAQILELAGKEAHNNG-ERTITPQPLDMAVHDNALLSTLFDTTTVSQVVPGRD-------

>Mouse_H2A.B.RatMouse1

HRRSRTSRAELIFAVSLVEQHLR-EVSRARR-LSDTVPIFLAAILESLTRRLLELAGNEAQRRGTERRITPELLDLAVYSNMELSDVFQFITISQVAPAHR-------

>Mouse_H2A.B.Mouse2

HRRSRTSRAELIFAVSLVEQHLR-EISRAWR-LSDMVPIFLAAILESLTRRLLELAGNEAQRRGTERRITPELLDLAVYSNMELSDVFQFITISQVAPAHR-------

>Mouse_H2A.B.Mouse3

QHHSRTSRGELIFAVSLVEQHLR-EVSRARR-LSDMVPVSLVAILEFLTSRLLELAGNEAQRRGTQRLITPQPLDLEVYSSMELSDVFQFITISQVAPAHR-------

>Rat_H2A.B.RatMouse1

RRRSRTSRAELIFAVSLVEQHLR-EGGHARRRLSETVPIFLAAILEFLTRRLLELAGNEAQRRGTQSRITPELLDLAVYSNTLLSELFQFITISRVAPAHH-------

>Panda_H2A.L.3

-----SMRAKLQFPVSRVDRLLR-EGCYAQR-LSSSTPVFLTGVLEYLTANILELAGQEARNHH-KMRITPEHVQRALVNNQHLSCLFEDITSPPAK-----------

>Panda_H2A.L.1

-----SMRAELQFPVSRVDRLLR-EGCYAQR-LSSSTPVFLTGVLEYLTANILELAGQEARNHH-KMRITPEHVQRALVNNQHLSCLFEDITSLPAK-----------

>Dog_H2A.L.1

-----SRRAELQFPVSRVDRLLR-EGHYAHR-LSSSTPVFLAGILEYLTSNILELAGQEARNSH-KMRITPEHLQKALGNNQYLSQLFEENTYSQGD-----------

>Dog_H2A.L.3

-----SRRAELQFPVSRVDRLLR-EGCYAHR-LSSSTPVFLTGILEYLTSNILELVGQEACNSH-KMRITPEHMQKALGNNQYLSQLFEENTYSQGD-----------

>Horse_H2A.L.3

-----STRAELQFPVSRVDRLLR-QGAYGQR-LSSSTPIFLAGILEYLTANILELASKEAHSSR-KIRITPEHVQRAVENNQHLSHLFENETYRQSD-----------

>Elephant_H2A.L.3

-----STRAELQFPVSRVDRLLR-EGNYAQR-LSSSTPVFLAGVLEYLTANILELAGNEAHNHH-KMRITPEHVETALDSNPQLSRLLNDVTRSQMD-----------

>Armadillo_H2A.L.Armadillo1

-----STRAELQFPVSRVDRVLR-ESHCAQR-LSLSTPVFLAGILEYLTANVLELASHETG--Q-RKRITPENVEKAVSKNPQLSRVFGDDINPQGD-----------

>Elephant_H2A.L.1

-----SARAELQFPVSRVDCLLR-EGNYAQC-LSLSTPIFLAGILEYVTANILELAGIEAYNHG-RIRITPEHVERAVDSDPQLSLLFHADANDEVD-----------

>Sheep_H2A.Q

---PCTMKTKLQFSKSHVDHHLQ-ENQDAQN-QNLTNQIYLSAILKYLSSNVLKLVSNETQS--------DCRIHKAMDNHPQLHHAF--------------------

>Cow_H2A.Q

---PCTMKTKLQFSKSHVDHHLQ-GNQDAHN-QNLTTQIYLSAILKNVSSNVLKLVSDETQS--------NCKIHRAKHNHPQLQHVF--------------------

>Pig_H2A.Q

---SRSTKTKLQFPESQGGPLLQ-ENHSAQH-LNLSTRVFLSAILKYVTANVLELVGNETPS--------NCRIQRTVGNNPQLSQLF--------------------

>Horse_H2A.Q

---SCSAKTKLQFPVSHVDCLQQ-ENHSAQH-LSLSTQVFLPAILKYVTNNILEWVGNEAHN--------SCRIRKAVANNQQLSHLF--------------------

>Dog_H2A.Q

---SSSTKTKLKFSVSHEDHLLQ-ENHPAQH-LRFSSQVCLSAILKYVATNILELVGNEAHN--------DCRVQRAVNNNMQSSHLF--------------------

>Rhino_H2A.Q

---SCSTKAKLHFPVSHMDRHQQ-ENHSAQQ-LSLSTPVFLSAIRKYVTNNILELVGNESHN--------NRRIRRAVDNAEQLSHLF--------------------

>Rabbit_H2A.L.3

-----SMRAELQFPVSHVDCLLR-EGHYAQR-LSSAAPVFLAGVLEYLTSNILELASKEAYNTG-RVRITGKHVERAVQDHQQLRSLLEKGTYSEVEEMYQLRDK---

>Sheep_H2A.L.3

-----STRAELQFPVSRVDRR-R-EGQGAHR-LSSATPVFLTAVLEYLMANILDLAGQEAGANH-RVRISPEHVQRALINNENLRHLFQPSAFSKPT-----------

>Sheep_H2A.L.1

-----STRAELQFPVSRVDRLLR-EGQFANR-LSSATPVFLTGILEYLMANILDLAGKEACINH-RVRISPEHVQ-------SLRRLFQPSAFSQPA-----------

>Pig_H2A.L.1

-----SSRAELQFPVSRVDRYLR-EGRYAQR-LSSQAPVFLAGVLEYLTANILELAASEARSNN-KMRIAPEHVQRAASHNQTLSSLFQASSVSRGA-----------

>Pig_H2A.L.pig

-----SSRAELQFPVSRVDRYLR-EGRYAQR-LSSHTPVFLAGVLEYLTANILELAAGEAHSSR-KMRIAPEHVQRARSHNETLSSLFQASSVSRGA-----------

>Pig_H2A.L.3

-----SSRAELQFPMSSLDCVLP-EGQYAQR-LSSYTPVFLAGVLEHLMAHILELAAREARSSR-KVRITPEHVQRALNNNETLSRLFQASSVSRGA-----------

>Rabbit_H2A.L.Rabbit2

-----STRAELQFPVSRVDRHLH-HDRYAQR-LSSSTPVFLAGVLEYLTSNILELAGEEAHKNS-RVRITPEHMRKAIESSEHLRDLLEEDPKPRDEDVAQPEEK---

>Rabbit_H2A.L.Rabbit1

-----STRAELQFPVSRVDRHLH-HDRYAQR-LSSSTPVFLAGVLEYLTSNILELAGEEAHKNS-RVRITPEHMRKAIESSEHLRDLLEEDPKPRDEDVAQPEEK---

>Rabbit_H2A.L.1

-----STRAELQFPVSRVDRHLH-HDRYAQR-LSSSTPVFLAGVLEYLTSNILELAGEEAHKNS-RIRITPEHMRKAIESSEHLRDLLEEDPKPRDEDVAQPEEK---

>GuineaP_H2A.L.GuineaP1

-----STRAQLQFPVSRVERYLR-ENGYLR--LSACTPVFLAGILEYLTASALHLAARVAHRRH-KKRISPEHLARALEKSEQLRQVFGDSTKALLDEIIQAKKK---

>GuineaP_H2A.L.1

-----SRRAELQLPVSRMERYLR-ENSYAPH-LPFSTPVFLEGVLEYLTASILDLARKEARGKR-KKHILPQHLETAAENNQQLGLRFGDSRKSMLDEMTQNKKK---

>Mouse_H2A.L.Mouse1

-----SQRGE--LPLSLVDRFLR-EEFHSSR-LSSSALSFLTSVLEYLTSNILELAGEVAHTTG-RKRIAPEDVRLVVQNNEQLRQLFKPGGTSVNE-----------

>Mouse_H2A.L.2

-----SQRGE--LPLSLVDRFLR-EEFHSSR-LSSSALSFLTSVLEYLTSNILELAGEVAHTTG-RKRVTPEDVRLVVQNNEQLRQLFKPGGTSVNE-----------

>Mouse_H2A.L.Mouse_Telo7

-----SQRGE--LPFSLVDRFLR-EEFHSSR-LSSSALSFLTSVLEYLTSNILELAGEVAQTTG-RKRIAPEDVRLVVQNNEQLRQLFKPGGTSVNE-----------

>Mouse_H2A.L.Mouse_Telo8

-----SQRGE--LPFSLVDRFLR-EEFHSSR-LSSSALSFLTSVLEYLTSNILELAGEVAQTTG-RKRIAPEDVRLVVQNNEQLRQLFKPGGTSVNE-----------

>Mouse_H2A.L.Mouse_Telo5

-----SQRGE--LPLSLVDRFLR-EEFHSSR-LSSSALSFLTSVLEYLTSNILELAGEVAQTTG-RKRIAPEDVRLVVQNNEQLRQLFKPGGTSVNE-----------

>Mouse_H2A.L.Mouse_Telo2

-----SQRGE--LPLSLVDRFLR-EEFHSSR-LSSSALSFLTSVLEYLTSNILELAGEVAQTTG-RKRIAPEDVHLVVQNNEQLRQLFKPGGTSVNE-----------

>Mouse_H2A.L.Mouse3

-----SQRGE--LPLSLVDHFLR-EEIHSSR-LSSSTLSFLTSVLEYLTSNILELAGEVAHTTG-RKRIAPEDVRLVVQNNEQLHQLFKPGGTSVNE-----------

>Mouse_H2A.L._Mouse2

-----SQRGE--LPLSLVDRFLR-EEIHSSR-LSSSALPFLTSVLEYLTSNILELAGEVAHTTG-RKCVAPEDVHLVVQNNEQLRQLFKSGGTSVNE-----------

>Mouse_H2A.L.Mouse_Telo10

-----SQRGE--FPLSLVDRFLP-EGNHSGR-LSSSAPVILDSVLEYLSSNILELAGEVAYTTG-RKRIAPEDVGLVVQNNEQLCQLFKPGATSVFD-----------

>Mouse_H2A.L.Y.2

-----SQRAELQFPVSRVDRFLG-EGIYSRR-LSSSALVFLVGVLEYLTPNILGLAGEVTHTSG-MKRIAPEHVCQVVQNKEQLHQLFKQGGTSVFE-----------

>Mouse_H2A.L.Y.1

-----SQRAELQFPVSRVDRFLG-EGIYSRR-LSSSALVFLVGVLEYLTPNILGLAGEVTHTSG-MKRIAPEHVCQVVQNKEQLHQLFKQGGTSVFE-----------

>Mouse_H2A.L.chr2

-----SQRAELQFPVSRVDRFLR-EGNYSRR-LSSSAPVFLAGVLEYLTSNILELAGEVAHTTG-RKRIAPEHVCRVVQNNEQLHQLFKQGGTSVFE-----------

>Rat_H2A.L.2

-----SRRAELQFPVSRVDRFLR-EGNYSRR-LSSSAPVFLAGVLEYLTSNILELAGEEAHTSG-RKRISPEHLCRVVQNNDQLHQLFKEGTKSVFE-----------

>Rat_H2A.L.3

-----SSRGKLHFPVNKVERLLR-ERNTSKC-PNSSAPVFLAGVLEYLTSNILDLAGKEAHNSG-SKLISPEHVTMAIRKNEGFHQLLKDNKWLAGE-----------

>Human_H2A.P

QTQDP-SRNELQVPRSFVDRVVQ-DERDVQS-QSSSTINTLLTLLDCLADYIMERVGLEASNNG-SMRNTSQDREREVDNNREPHSAESDVTRFLFDEMP--------

>Baboon_H2A.P

QTQDR-SRNELRVPMSFVDRVVQ-DEQDAQS-QSSSTINILLTLLDCLADYIMEQVGLEVINNG-RMRNTSQDGEREVDNHHEPHRTESDGTRFVFDEMP--------

>Marmoset_H2A.P

QNQEP-SRNEPQVPRTFVDRLLQ-DERDAQS-QTSSMINSLLTLLDCLGDFIMEQVGLEASHND-SMNNTSQDAEREVDNNREPHCLESDITCFLLDGMP--------

>Rat_H2A.P

QTEDPSSRPEVQVPVNYVYRLLQ-EEQYTPC-LGSTTSDFLLAMLDYLTDYILEVVGSEANIN--SQQNISQDRERQRENDREPPQAFKNAPFSLFDEMP--------

>Mouse_H2A.P

QIEDPSSRPEVQVPVNYVYRILQ-EEQYTPC-IGSTTSDFLLAMLDYLTDYILEVVGSEANIN--NQQNISQDRERQRDNDREPSRGFKNAPFSLFDEMP--------

>Dog_H2A.P

QTQAHLVTTELQFPVSYVDRLLQ-EDQRTHC-LSSTSTEFLLAMLDSLTDYILERVGTEANNN--NMQTAPQDVERAVGSNREPQQCLKDTAFTLFDEMP--------

>Panda_H2A.P

QTQAHLITTELQVPVSYVDRLLQ-ENQYNHP-LSSSTTDFLLTMLDYLTDYILDVVGTEANNS--NMPTAPQDVERAVDSSGEPYHRSKDTAFTLFDEMP--------

>Pig_H2A.P

EAPTHLTTTEPQVPVSFVDHLLQ-EDQYVHT-LSSSTTHFLFSVLEYLTDYILDLVDTKANTG--RMQMTPQDVERAVDSNAEPHRQVKDTAFALFDEMP--------

>Cat_H2A.P

QTPSHLIRSELKCPLTYVDRLLL-EDQHTQG-WDSSINHFRLTMLDHLTDYILEMVANEAINS--NVHTVPQD-DRGVGSNRQPRQNLKNVNFTLLDEMP--------

>Armadillo_H2A.P

LTPSLSARTEMEFSPSGLERLLQ-EDRYAQY-LRSNTPDFLLAFLDYLTTYILELAANEAHNNH-RSHIAPLDVERGVRNNRLLRHLLRGVNFSQSDEMF--------
