# Supplementary material for: Evolutionary origins and diversification of testis-specific short histone H2A variants in mammals
Source: HighWire-hosted journal article supplement (doi:10.1101/gr.229799.117), 2018-03-16
Supplement: Supplemental_Data_S2.docx [file Supplemental_Data_S2.docx]

**Supplemental Data S2: Alignments used to generate logo plots shown in Figure 3**

**H2A**

>Panda_H2A

MSGRGKQGGKARAKAKSRSSRAGLQFPVGRVHRLLRKGNYAERVGAGAPVYLAAVLEYLT

AEILELAGNAARDNKKTRIIPRHLQLAIRNDEELNKLLGRVTIAQGGVLPNIQAVLLPKK

TESHHKAKGK*

>Armadillo_H2A

MSGRGKQGGKARAKAKTRSSRAGLQFPVGRVHRLLRKGNYAERVGAGAPVYLAAVLEYLT

AEILELAGNAARDNKKTRIIPRHLQLAIRNDEELNKLLGKVTIAQGGVLPNIQAVLLPKK

TESHHKAKGK*

>ChineseHamster_H2A

MSGRGKQGGKARAKAKTRSSRAGLQFPVGRVHRLLRKGNYSERVGAGAPVYLAAVLEYLT

AEILELAGNAARDNKKTRIIPRHLQLAIRNDEELNKLLGRVTIAQGGVLPNIQAVLLPKK

TESHHKAKGK*

>Leopard_H2A

MSGRGKQGGKARAKAKSRSSRAGLQFPVGRVHRLLRKGNYAERVGAGAPVYLAAVLEYLT

AEILELAGNAARDNKKTRIIPRHLQLAIRNDEELNKLLGRVTIAQGGVLPNIQAVLLPKK

TESHHKAKGK*

>Mouse_H2A

MSGRGKQGGKARAKAKTRSSRAGLQFPVGRVHRLLRKGNYSERVGAGAPVYLAAVLEYLT

AEILELAGNAARDNKKTRIIPRHLQLAIRNDEELNKLLGRVTIAQGGVLPNIQAVLLPKK

TESHHKAKGK*

>Rat_H2A

MSGRGKQGGKARAKAKSRSSRAGLQFPVGRVHRLLRKGNYSERVGAGAPVYLAAVLEYLT

AEILELAGNAARDNKKTRIIPRHLQLAIRNDEELNKLLGRVTIAQGGVLPNIQAVLLPKK

TESHHKAKGK*

>Rhino_H2A

MSGRGKQGGKARAKAKSRSSRAGLQFPVGRVHRLLRKGNYAERVGAGAPVYLAAVLEYLT

AEILELAGNAARDNKKTRIIPRHLQLAIRNDEELNKLLGRVTIAQGGVLPNIQAVLLPKK

TESHHKAKGK*

>Pig_H2A

MSGRGKQGGKARAKAKTRSSRAGLQFPVGRVHRLLRKGNYAERVGAGAPVYLAAVLEYLT

AEILELAGNAARDNKKTRIIPRHLQLAIRNDEELNKLLGKVTIAQGGVLPNIQAVLLPKK

TESHHKAKGK*

**H2A.P**

>Mouse_H2AP

MSEKKSQEKPCSDNNQIEDPSSRPEVQVPVNYVYRILQEEQYTPCIGSTTSDFLLAMLDY

LTDYILEVVGSEA-NINNQQNISQDRERQRDNDREPSRGFKNAPFSLFDEMPGPRRNG*

>Rat_H2AP

MSGKKSQEKACSDNKQTEDPSSRPEVQVPVNYVYRLLQEEQYTPCLGSTTSDFLLAMLDY

LTDYILEVVGSEA-NINSQQNISQDRERQRENDREPPQAFKNAPFSLFDEMPGPRRNG*

>ChineseHamster_H2AP

MSGKKNQGKSCSDNKKMEDPSSKPEVQIPVNYVYHLLQEEQYTPCLGSTTSDFLLAMLDY

ITDYILEVVGSEA-NINSQQDIPQDRERQGDNDHDHSHAFKNAPFSLFDEMPGPRRNG*

>Pig_H2AP

MSGKQSPEGSY----EAPTHLTTTEPQVPVSFVDHLLQEDQYVHTLSSSTTHFLFSVLEY

LTDYILDLVDTKA-NTGRMQMTPQDVERAVDSNAEPHRQVKDTAFALFDEMPGSRRNG*

>Leopard_H2AP

MSGKKIQASSC----QTPSHLIRSELQCPLSYVDRLLLEDQHTQGWNSSTNHFRLTMLDH

LTDYILQMVANEA-INSNMHTVPQD-DRGVGSNGQRPQNLKNVSFTLFDEMPGPRRSG*

>Panda_H2AP

MSGKKSHESSY----QTQAHLITTELQVPVSYVDRLLQENQYNHPLSSSTTDFLLTMLDY

LTDYILDVVGTEA-NNSNMPTAPQDVERAVDSSGEPYHRSKDTAFTLFDEMPGSRRNG-

>Rhino_H2AP

MAEEQNRDSSY----QTRACLPTAELQFPVSYLDRLLQKDEHAQHPSSSTEDFLVAMLDC

LTDYILEMVGNEA---TNSSSVAQDVEGGVNNNREPQRQVKDAAFTLFDKMPGGRKNG*

>Aramdillo_H2AP

MSGKRSHESSHNRRTLTPSLSARTEMEFSPSGLERLLQEDRYAQYLRSNTPDFLLAFLDY

LTTYILELAANEAHNNHRSHIAPLDVERGVRNNRLLRHLLRGVNFSQSDEMFHSRKNG*

**H2A.L**

>ChineseHamster_H2AL3

MEEKKR--------KETISRITRGQLQFSLDRIERFFRDGNFSQRLSASAPVFLAGVLEF

LTSNILDLAGREAHANGTRLITPEHVTQVVQNNDQLREVFKEHEDPVV----SET-----

PEPEKN*

>Rat_H2AL2

MAGKRR--------RRNISRSRRAELQFPVSRVDRFLREGNYSRRLSSSAPVFLAGVLEY

LTSNILELAGEEAHTSGRKRISPEHLCRVVQNNDQLHQLFKEGTKSV-----FES-----

ADPDEN*

>Mouse_H2AL2

MAKKMQ-----RRRRQKRTRSQRGEL--PLSLVDRFLREEFHSSRLSSSALSFLTSVLEY

LTSNILELAGEVAHTTGRKRVTPEDVRLVVQNNEQLRQLFKPGGTSV-----NE------

---DDN*

>Pig_H2AL3

MSRKRNLPQCSHRKKHALSCSSRAELQFPMSSLDCVLPEGQYAQRLSSYTPVFLAGVLEH

LMAHILELAAREARSSRKVRITPEHVQRALNNNETLSRLFQASSVSRGAEEGAEEPGAEE

PLP----

>Leopard_H2AL1

MSGRHRRRHRRRRRRHAVSRSRRAELQFPVSRVERLLREGRYAPRLSASTPVFLTAVLEY

LTANILELAGKEALDSHKMRITPEHVQRALGSNQHLRGLLENTTSPRV----DGL-----

PRVRKW*

>Panda_H2AL3

MSGRRSPWHSHQHKRHGLSRSMRAKLQFPVSRVDRLLREGCYAQRLSSSTPVFLTGVLEY

LTANILELAGQEARNHHKMRITPEHVQRALVNNQHLSCLFEDITSPPA----KGT-----

PQLRKC-

>Rhino_H2AL3

MPGKRSRQLSLRRKRQAQSRSTRAELQFPVSRVDHFLRQGPYGQRLSSSTPVFLAGVLEY

LTANILEQASKEAHSSRKIRITPEHVQRAVDNNLNLSHLFENDTYRQD----EQM-----

PQPSRK*

>Armadillo_H2AL3

MRGKKSRQSTYWRRRPALSRSTRAELQFPVSRVDRVLRESHCAQRLSLSTPVFLAGILEY

LTANVLELASHE--TGQRKRITPENVEKAVSKNPQLSRVFGDDINPQG----DYM-----

PHPRNN-

**H2A.B**

>Mouse_H2ABRatMouse1

MPRNRENCLRE--------------SSGRRHR-RSRTSRAELIFAVSLVEQHLREVSRA-

RRLSDTVPIFLAAILESLTRRLLELAGNEAQRRGTERRITPELLDLAVYSNMELSDVFQF

ITISQVAPAHR*-------

>Rat_H2ABRatMouse1

MPRTTENSLRG--------------SSSRRRR-RSRTSRAELIFAVSLVEQHLREGGHAR

RRLSETVPIFLAAILEFLTRRLLELAGNEAQRRGTQSRITPELLDLAVYSNTLLSELFQF

ITISRVAPAHH*-------

>ChineseHamster_H2ABa

MPRTRQSSRRG--------------SSSRR----SRTDRAELTFSVSLVEHHLRESGHA-

PRLSETVPILLTAILEFLTRRLLELASNEAQRLGAQRLITPEILDLTIYNNALLSEMFQF

TTISQTAPAGPRRRRRQI*

>Pig_H2AB11

MPGKR--SRRK--------------SPGRQGRTCARTTRAGLSASVSHMERLLREGPYA-

QCLSSSARVFLAATIEYLTARVLELAGDEAQIVG-RRCITPELVAMAVHNNALLSAFFGT

LAISQVAPTQE*-------

>Panda_H2AB11

MPGDR--SRRG--------------SSSGQRRTRSRTARAELSFSVSHVERLLREGHYA-

QRLGSSAPVFLAAVIQYLTAKVLELAGNEAQNSG-GRRITPQLVDMAVHNHALLSGFFGT

TTISQVAPAWN--------

>Leopard_H2AB2

MPVRR--SRRG--------------SSGGQSRVRSRTARAELTFSVSHVERLLREGRYS-

QRLGASAPIFLAAVIQSLTAKVLELAGIEARNRG-RRLITPHVVDMVVHNHPLLSAFFQS

TIISQAVPGRY*-------

>Rhino_H2AB11

MPGNR--SRRRRRRRRRRRRRRRRGSSGGQSRPRSRTARAELSFSVSHVERLLRQGHYT-

RRLSPSTPVFLAAVVQYLTAKVLELASNEAHNGG-RRRITPELVDMAVHNNALLSGFFGA

TTISQVAPTRE*-------

>Armadillo_H2AB11

MSGRR--SHGG--------------SSGRRRRNRSRTSRAELSFSVSHVERLLREGHYA-

QRLSSSAPVYLAAILEYLTATILELAGNEARNSG-MRRITPQLVDMAVHNNALLSGFFDT

TTVSQVAPARE--------

**H2A.Q**

>ferret_H2AQ

MSGKRSSQTSYRLGKQTSSCSTKTKLQVPVSHVEPILQEHQPVQNLSFSSQVCLSAILKYVATNILELVGNEAQHNCRVQRAMNNNMQNSHLFEDDTTSQL----

>rhino_H2AQ

MSEKRSCQNSSRLKKQTFSCSTKAKLHFPVSHMDRHQQENHSAQQLSLSTPVFLSAIRKYVTNNILELVGNESHNNRRIRRAVDNAEQLSHLFEDDNQFSG----

>Blackfruitbat_H2AQ

MSGKRSCLN-YKLKKQTLSCTTKTKLHLPVSHEDSLLQGNNSARNLRFSTQVFLSVILKYVTTNILELVDNEAHNNCCVQRAVDKNPQLGQHFKNGNNSQVDEMF

>cow_H2AQ

MSGNRSYHSSDGLKKRTVPCTMKTKLQFSKSHVDHHLQGNQDAHNQNLTTQIYLSAILKNVSSNVLKLVSDETQSNCKIHRAKHNHPQLQHVFDKDAKSQVHEMF

>pig_H2AQ

MSANRSCQNSCGLRKHTLSRSTKTKLQFPESQGGPLLQENHSAQHLNLSTRVFLSAILKYVTANVLELVGNETPSNCRIQRTVGNNPQLSQLFENETDPQVREMF

>polarBear_H2AQ

MSGKRSGPSSYRLGKQTSSCFPKSKLQFPVSHEEPLLQEDHPAQQLSLSSQVCLSAILKYVATNILELVGNEAQHNCRVQRAVNNNMQSGHLFKDDAASQVSEMF

>dog_H2AQ

MSGKRSSQNSCRLGKQTLSSSTKTKLKFSVSHEDHLLQENHPAQHLRFSSQVCLSAILKYVATNILELVGNEAHNDCRVQRAVNNNMQSSHLFEDDTTSQVSEMF

>walrus_H2AQ

MSGKRSGRSSYRLGKQTSSCSTKTKLQFSMSHEEPLLQENHPAQKLSFSRQVCLSAILKYVATNILELVGNKAHHNCRVQTAMDHDMQISHLFEDDTTSQVSEMF

>horse_H2AQ

MSGKRSCQN-YKLMKQTFSCSAKTKLQFPVSHVDCLQQENHSAQHLSLSTQVFLPAILKYVTNNILEWVGNEAHNSCRIRKAVANNQQLSHLFEDDTDSQVNEMF
