# Supplementary material for: Evolutionary origins and diversification of testis-specific short histone H2A variants in mammals
Source: HighWire-hosted journal article supplement (doi:10.1101/gr.229799.117), 2018-03-16
Supplement: Supplemental_Data_S3.docx [file Supplemental_Data_S3.docx]

**Supplemental Data S3: Alignments used for selection analysis.**

***H2A.B* eight species**

>Mouse_H2ABRatMouse1

ATGCCAAGGAACAGGGAAAACTGTCTTCGAGAG---------------------------

---------------TCTTCAGGTCGCCGCCACCGT---CGCTCCCGCACCTCCAGAGCT

GAGCTAATCTTTGCTGTGAGCCTGGTGGAACAGCATCTGAGGGAGGTTAGCCGTGCC---

CGGAGGCTCAGTGATACGGTGCCCATCTTCCTGGCAGCCATCCTGGAGTCCCTCACCCGC

AGGTTGCTGGAGCTTGCCGGCAATGAGGCCCAACGCAGAGGTACCGAGAGGCGCATCACT

CCTGAACTGCTGGACTTGGCTGTCTACAGCAATATGGAGCTAAGTGATGTGTTCCAATTC

ATCACCATCTCCCAGGTGGCCCCGGCTCATCGCTAG---------------------

>Rat_H2ABRatMouse1

ATGCCCAGGACCACGGAGAACAGTCTTCGAGGT---------------------------

---------------TCCTCATCTCGTCGCCGCCGT---CGCTCCCGCACCTCAAGAGCC

GAGCTGATCTTTGCCGTGAGCCTGGTGGAACAACATCTGAGGGAAGGCGGCCATGCCCGG

AGGAGGCTGAGTGAAACGGTGCCCATTTTCCTGGCAGCCATCCTGGAGTTCCTCACCCGC

AGGCTGCTGGAGCTGGCAGGCAATGAAGCCCAACGAAGAGGTACCCAGAGCCGCATCACT

CCGGAGCTGCTGGACTTGGCAGTCTACAGCAATACCCTGCTCAGCGAATTGTTCCAATTC

ATCACCATCTCACGGGTGGCTCCAGCTCATCACTAG---------------------

>chineseHamster_H2ABa

ATGCCCAGGACCAGGCAGAGCAGCCGTCGAGGG---------------------------

---------------TCGTCGTCTCGCCGC------------TCCCGCACCGACAGAGCT

GAGCTAACCTTCTCTGTGAGCCTGGTGGAGCACCATCTTCGTGAGAGCGGCCATGCC---

CCGAGGCTGAGCGAAACAGTGCCCATCTTGCTGACCGCCATCCTGGAGTTCCTGACACGC

AGGCTGCTGGAGCTGGCAAGCAACGAGGCCCAACGCCTAGGCGCCCAGAGGCTCATCACC

CCTGAAATCCTAGACTTGACCATCTACAACAACGCCCTTCTGAGCGAAATGTTCCAGTTC

ACCACCATCTCTCAGACGGCCCCAGCTGGACCTCGTCGTCGTCGACGTCAAATCTAG

>Pig_H2AB11

ATGCCCGGGAAAAGG------AGCCGTCGAAAG---------------------------

---------------TCACCCGGTCGCCAGGGGCGGACCTGCGCCCGCACCACCCGAGCC

GGGCTGTCCGCCTCCGTGAGCCACATGGAGCGCCTCCTGCGGGAGGGCCCCTACGCC---

CAGTGCCTGAGCTCGTCCGCCCGGGTCTTCCTCGCGGCCACCATCGAGTACCTGACGGCC

AGGGTCCTGGAGCTGGCGGGCGACGAGGCCCAGATTGTGGGT---AGGAGGTGCATCACC

CCAGAGCTGGTGGCCATGGCGGTCCACAACAACGCCCTGCTCAGCGCCTTCTTCGGAACC

CTCGCCATCTCGCAAGTGGCCCCGACCCAGGAGTAG---------------------

>ailMel1_dna_H2AB11

ATGCCGGGGGACAGA------AGCCGTCGAGGG---------------------------

---------------TCGTCCAGTGGCCAGAGGCGGACCCGCTCCCGCACTGCCCGAGCC

GAGCTGTCGTTCTCTGTGAGCCACGTGGAGCGCCTCCTGCGGGAGGGCCACTACGCC---

CAGCGCCTGGGCTCGTCCGCGCCGGTCTTCCTAGCAGCAGTCATCCAGTACCTGACGGCC

AAAGTCCTGGAGCTGGCGGGCAACGAGGCCCAGAACAGCGGC---GGGAGGCGCATCACC

CCGCAGCTCGTGGACATGGCAGTCCACAACCACGCGCTGCTCAGCGGCTTCTTCGGGACC

ACGACCATCTCCCAGGTGGCCCCGGCCTGGAAC------------------------

>leopard_H2AB2

ATGCCTGTGAGGAGG------AGCCGTCGAGGG---------------------------

---------------TCGTCCGGTGGCCAGAGCCGGGTCCGCTCCCGCACTGCCCGAGCC

GAGTTGACGTTCTCCGTGAGCCACGTGGAGCGCCTCCTGCGGGAGGGCCGCTACTCG---

CAGCGCCTGGGCGCGTCCGCCCCGATCTTCCTAGCGGCCGTCATCCAGTCCCTGACGGCC

AAGGTCCTGGAGCTGGCCGGCATCGAGGCCCGGAACAGAGGC---AGGAGGCTCATCACC

CCGCATGTCGTGGACATGGTGGTCCACAACCACCCGCTGCTCAGCGCCTTCTTCCAGTCC

ACCATCATCTCCCAGGCGGTCCCGGGCCGGTACTAG---------------------

>rhino_H2AB11

ATGCCCGGGAACCGG------AGCCGTCGTCGCCGTCGTCGCCGTCGTCGTCGTCGTCGT

CGTCGTCGTCGAGGGTCGTCCGGTGGCCAGAGTCGGCCCCGCTCCCGCACCGCCCGAGCG

GAGCTATCGTTCTCTGTGAGCCACGTGGAGCGCCTCCTGCGGCAGGGCCACTACACC---

CGGCGCCTGAGCCCCTCCACCCCGGTCTTCCTGGCCGCCGTCGTCCAGTACCTGACGGCC

AAGGTCCTGGAGCTGGCGAGCAACGAGGCCCACAACGGCGGC---AGGAGGCGCATCACC

CCAGAGCTCGTGGACATGGCGGTCCACAACAACGCGCTGCTCAGCGGCTTCTTTGGGGCT

ACGACCATCTCCCAGGTGGCCCCGACCCGGGAGTAG---------------------

>dasNov3_H2AB11

ATGTCCGGGAGAAGG------AGCCACGGAGGG---------------------------

---------------TCGTCCGGTCGTCGGAGGCGGAACCGCTCCCGCACGTCCCGAGCC

GAGCTGAGCTTCTCCGTGAGCCACGTGGAGCGCCTGCTGCGGGAGGGCCACTACGCC---

CAGCGCCTGAGCTCGTCGGCGCCCGTCTACCTGGCTGCCATCCTCGAGTACCTGACGGCC

ACGATCCTGGAGCTGGCCGGCAACGAGGCCCGCAACAGCGGC---ATGAGGCGCATCACC

CCCCAGCTGGTGGACATGGCCGTCCACAACAACGCTCTGCTGAGTGGGTTCTTCGACACT

ACAACCGTCTCCCAAGTGGCCCCCGCCCGGGAG------------------------

***cenH3* eight species**

>mouse_cenH3

ATG---------------------GGCCCGCGTCGC------------------------

------------------------------AAACCGCAGACCCCAAGGAGGAGACCCTCC

AGCCCGGCGCCTGGACCCTCGCGACAGAGCTCCAGTGTAGGCTCTCAGACACTGCGCAGA

AGA---CAGAAATTC---ATGTGGCTTAAGGAAATCAAGACCCTGCAGAAGAGCACAGAC

CTCTTGTTCAGGAAGAAGCCTTTCAGCATGGTTGTTAGAGAAATATGTGAGAAGTTCAGC

CGTGGTGTGGATTTTTGGTGGCAAGCCCAGGCCTTGTTGGCCCTTCAGGAGGCAGCAGAA

GCTTTCCTCATCCACCTCTTTGAGGACGCCTACCTCCTCTCCTTACATGCTGGTCGGGTC

ACGCTTTTCCCCAAAGACATTCAGTTGACCAGGAGAATCCGAGGCTTCGAGGGCGGACTC

CCCTAA

>rat_cenH3

ATGGTCGGGCGCCGCAAGCCAGGGACCCCGAGGAGGCGACCCTCTAGTCCGGCGCCCGGA

CCCTCTCAGCCAGCCACGGACTCGCGTCGCCAGTCGAGGACTCCGACGAGGCGGCCCTCC

AGTCCGGCGCCCGGACCCTCGCGACGGAGCTCCGGAGTAGGCCCTCAGGCACTACACAGA

AGA---CGGAGATTC---CTGTGGCTTAAGGAAATAAAGAACCTGCAAAAGAGCACAGAC

CTCTTGTTTAGGAAGAAGCCTTTCGGCCTCGTGGTAAGAGAAATATGTGGGAAATTCAGC

CGTGGTGTGGATTTATATTGGCAAGCTCAGGCCTTGTTGGCCCTTCAAGAGGCAGCAGAA

GCGTTTCTCGTTCACCTCTTTGAGGACGCCTATCTCCTCTCCTTACATGCTGGCCGAGTC

ACGCTTTTCCCCAAAGATGTGCAGCTAGCCAGGAGGATCCGAGGCATTGAGGGAGGACTC

GGCTGA

>Chinese_hamster_cenH3

ATG---------------------GGCCCGCGCCGC------------------------

------------------------------AAGCCGAGGACCCCGAGAAGGCGCCCCTCC

AGCCCGGTTCCCGGACCCTCGCGACGCAGCTCCCGTCCAGGTAAGAGG------------

------CGGAAATTT---CTGTGGCTTAAGGAGATAAAGAAACTGCAGAGGAGCACCGAC

CTCCTGCTAAGGAAGCTTCCTTTCAGCCGAGTTGTAAGAGAAATATGTGGGAAATTCACT

CGAGGTGTGGACCTATGTTGGCAAGCCCAAGCCTTGTTGGCCCTTCAAGAGGCAGCAGAA

GCATTTCTAGTTCACCTCTTTGAGGATGCCTATCTCCTCACCTTACATGCCGGCAGAGTC

ACTATCTTCCCCAAGGACATACAGCTCACCAGGAGGATCCGAGGCATTGAGGGAGGACTT

GGCTGA

>leopard_cenH3

ATG---------------------GGCCCGCGCCGCCGG---------------------

------------------------AGCCGCAAACCCGAAGTCCCGAAGAGGCGCACCGCG

AGCCCGACCCCCAGCCCCCCCCGGCGGGGCCCCTCCTTAGGCGCTTCCTCCCGTCAGCGT

GGTCCCCGGAGAAGT---CGGGTTCTGAAGGAGATCCGAAAGCTTCAGAAAAGCACAGAC

CTGTTGTTAAGGAAGAGCCCCTTTGGCCGCCTGGCAAGAGAGATATGTGTTAAATTCACT

CGTGGTGTGGACTTCTACTGGCAAGCCCAGGCCCTGTTGGCCCTACAAGAGGCTGCAGAA

GCATTTCTGGTTCATCTCTTTGAGGACGCCTATCTTCTCTCCTTACATGCCGGCCGCGTT

ACTCTCTTCCCGAAGGATGTGCAGCTGGCCAGGAGGATCCGAGGCATTCAGGAAGGGCTT

GGCTGA

>panda_cenH3

ATG---------------------GGCCCGCGCCGCCGG---------------------

------------------------ACCCGCAAGCCCGAAGTCCCGAGGAGGCGCACCGCG

AGCCCGGCCCCCAGCCCTCCCCGGCGGGGCCCCCGCTTAGGCGCTCCCTCCCGTCAGCGT

CGTCCCCGGAGACAT---CGGGTTCTGAAGGAGATCCGAATGCTTCAGAAGAGCACAGGC

TTGTTGATAAGGAAGACCCCCTTTGGCCGCCTGGCAAGAGAGATATGTGTTAAATTCACT

CGAGGTGTGGACTTCTCTTGGCAAGCCCAGGCCCTGTTGGCCCTACAAGAGGCCGCAGAA

GCATTTCTAGTTCATCTCTTTGAGGACGCCTATCTCCTGTCCTTACATGCCGGCCGCGTT

ACTCTCTTCCCGAAGGATGTGCAGTTGGCCAGGAGGATCCGAGGCATTCAGGAAGGGCTT

GGCTGA

>pig_cenH3

ATG---------------------GGCCCGCGCCGCCGG---------------------

------------------------AGACGCAAGCCCGAAACTCCACGGAGGCGCCCCGCG

AGCCCGGCTCCCGCCGCCCCCCGGCGGGGCCCCCCCTTAGGTCCC---------------

------CGGAGACAC---CGCGTTCTGAGGGAGATCCGAATTCTTCAGAAGAGCACGCAC

CTGTTGTTAAGGAAGAACCCCTTCTGCCGCCTGGCACGAGAAATATGTGTTCAGTTCACT

CGTGGTGTGGATTTCAATTGGCAAGCCCAGGCCCTGCTGGCCCTACAAGAGGCGGCAGAA

GCGTTTCTCGTTCATCTCTTTGAGGACGCCTACCTCCTCTCCCTGCACGCCGGCCGCGTG

ACTCTCTTCCCCAAGGACATCCAGCTGGCCAGGAGGATCCGGGGCATTCAGGAAGGGCTC

GGCTGA

>rhino_cenH3

ATG---------------------GGCCCGCGCCGC------------------------

------------------------------AAGCCCGAAGTCCCGAGGAGGCGCGCCGCC

AGCCCGGCCCCCGGCAGCCCCCGGCGGGCCGCCTCCTTAGGCACTTCCTCCCGTCCACGT

GGTCGCCGGAGGTACGCGAAGGTTCTGAGTGAGATCCGAAAGCTTCAGAAGAGCACACAC

CTATTGTTAAGGAAGAGCCCCTTCGCCCGCCTGGCAAGAGAAATATGTGTTACATTCACT

CGTGGTGTGGACTTCAGTTGGCAAGCCCAGGCCCTGTTGGCCCTACAAGAGGCAGCAGAA

GCATTTCTAGTTCATCTCTTTGAGGACGCCTATCTGCTCTCCTTACATGCCGGCCGAGTT

ACTCTCTTCCCGAAGGATGTGCAGCTGGCCAGGAGGATCCGAGGCATTGAGGAAGGGCTC

GGCTGA

>armadillo_cenH3

ATG---------------------GCCCCGCGCCGCCGG---------------------

------------------------AGCCGCAAGCCCGAAGCCCCCGAGAGGCGGCCCGCG

GCCCCCGCT------ACCCCGCGGCGGGACGTCTCCTCAGGCGCTTCCTTCCGTCGACGT

GGTGTGCAGAGATAC---AGGGTTCTGAAGGAGATCAAAAAGCTTCAGAAGAGCACAGAT

CTATTGATAAGGAAGCGGCCCTTCAGCCTCCTGGTAAGAGAGATATGCTCTAAATTCACT

CGCGGTGTGGACTTCAATTGGCAAGCCCAGGCCCTGCTGGCCCTACAAGAGGCAGCAGAA

GCATTTCTAGTTCATCTCTTTGAGGACGCCTACCTCCTCTCTCTGCATGCTGGCCGTGTC

ACTCTTTTCCCGAAGGATGTGCAGCTGGCCAGGAGGATCCGAGGCATTGAAGCGGGACTT

GGCTGA

***H2A* eight species**

>panda_H2A

ATGTCAGGACGCGGAAAGCAGGGAGGCAAAGCTCGCGCCAAGGCCAAGTCGCGGTCGTCCCGCGCTGGCCTGCAGTTCCC

GGTGGGCCGAGTGCACCGCCTGCTGCGCAAGGGCAACTACGCCGAGCGGGTGGGGGCCGGCGCGCCGGTGTACCTGGCCG

CGGTGCTGGAGTACCTGACGGCGGAAATCCTGGAGCTGGCGGGGAACGCGGCCCGCGACAACAAGAAGACGCGCATCATC

CCGCGCCACCTGCAGCTGGCCATCCGCAACGACGAGGAGCTCAACAAGCTGCTGGGCCGCGTGACCATCGCGCAGGGCGG

CGTCCTGCCCAACATCCAGGCCGTGCTGCTGCCCAAGAAGACCGAGAGCCACCACAAGGCCAAGGGCAAGTGA

>armadillo_H2A

ATGTCCGGACGCGGCAAGCAGGGCGGCAAGGCGCGCGCCAAGGCCAAGACGCGCTCGTCGCGGGCCGGCCTGCAGTTCCC

CGTGGGCCGCGTGCACCGCCTGCTGCGCAAGGGCAACTACGCCGAGCGGGTCGGCGCCGGCGCCCCGGTCTACCTGGCCG

CCGTGCTCGAGTACCTGACGGCCGAGATCCTCGAGCTGGCGGGCAACGCGGCCCGCGACAACAAGAAGACGCGCATCATC

CCGCGCCACCTGCAGCTGGCCATCCGCAACGACGAGGAGCTCAACAAGCTGCTGGGCAAGGTCACCATCGCGCAGGGCGG

CGTGCTGCCCAACATCCAGGCCGTGCTGCTGCCCAAGAAGACCGAGAGCCACCACAAGGCCAAGGGCAAGTGA

>chineseHamster_H2A

ATGTCTGGACGCGGCAAGCAGGGTGGCAAGGCTCGCGCCAAGGCCAAGACCCGCTCCTCACGGGCCGGCCTTCAGTTCCC

CGTCGGCCGTGTGCACCGTCTGCTCCGCAAGGGCAACTACTCGGAGCGGGTGGGCGCCGGCGCCCCGGTGTACCTGGCGG

CCGTGCTGGAGTACCTGACGGCCGAGATCCTGGAGCTGGCTGGCAACGCGGCCCGCGACAACAAGAAGACCCGCATCATC

CCGCGCCACCTGCAGCTGGCCATCCGCAACGACGAGGAGCTCAACAAGCTCCTGGGACGCGTGACCATCGCGCAGGGCGG

CGTCCTGCCCAACATCCAGGCGGTGCTGCTGCCCAAGAAGACCGAGAGCCACCACAAGGCCAAGGGAAAGTAA

>leopard_H2A

ATGTCTGGACGTGGCAAGCAGGGAGGTAAGGCTCGCGCCAAGGCGAAGTCTCGCTCTTCTCGCGCCGGCCTGCAGTTCCC

GGTGGGGCGCGTGCACCGCCTGCTCCGCAAGGGCAACTACGCCGAGCGGGTCGGGGCCGGCGCGCCGGTGTACCTGGCGG

CCGTGCTGGAGTACCTGACGGCCGAGATCCTGGAGCTGGCGGGCAACGCGGCCCGCGACAACAAGAAGACGCGCATCATC

CCGCGCCACCTGCAGCTGGCCATCCGCAACGACGAGGAGCTCAACAAGCTGCTGGGCCGCGTCACCATCGCGCAGGGCGG

CGTCCTGCCCAACATCCAGGCCGTGCTGCTGCCCAAGAAGACCGAGAGCCACCACAAGGCCAAGGGCAAGTGA

>mouse_H2A

ATGTCTGGACGCGGCAAACAGGGCGGCAAGGCTCGCGCCAAGGCCAAGACCCGCTCCTCCCGGGCCGGCCTGCAGTTCCC

CGTGGGCCGCGTGCACCGGCTGCTCCGCAAGGGCAACTACTCGGAGCGCGTGGGCGCCGGCGCCCCGGTGTACCTGGCGG

CCGTGCTGGAGTACCTGACGGCCGAGATCCTGGAGCTGGCGGGCAACGCGGCCCGCGACAACAAGAAGACGCGCATCATC

CCGCGCCACCTGCAGCTGGCCATCCGCAACGACGAGGAGCTCAACAAGCTGCTGGGCCGCGTGACCATCGCGCAGGGCGG

CGTCCTGCCCAACATCCAGGCCGTACTGCTGCCGAAGAAGACCGAGAGCCACCACAAGGCCAAGGGAAAATAA

>rat_H2A

ATGTCTGGTCGTGGCAAGCAGGGCGGCAAAGCTCGTGCAAAAGCGAAGTCTCGCTCATCCCGCGCTGGCCTGCAGTTTCC

AGTGGGCCGTGTGCACCGCCTTCTCCGTAAGGGCAACTACTCGGAGCGGGTGGGCGCCGGCGCTCCGGTGTACCTAGCGG

CTGTGCTGGAATACCTGACTGCTGAGATCCTGGAGCTGGCTGGGAATGCGGCCCGCGATAATAAGAAGACGCGGATTATC

CCGCGCCACCTGCAGTTGGCCATCCGCAACGACGAGGAGCTCAACAAGCTGCTGGGCCGCGTGACCATCGCGCAGGGCGG

CGTCCTGCCCAACATCCAGGCGGTGTTGCTGCCCAAGAAGACGGAGAGCCACCACAAGGCCAAGGGCAAGTGA

>rhino_H2A

ATGTCTGGCCGAGGAAAGCAAGGAGGTAAAGCGCGCGCTAAAGCGAAATCTCGTTCTTCTCGCGCTGGTCTTCAGTTCCC

CGTGGGCCGAGTGCACCGCCTGCTCCGCAAGGGCAACTATGCCGAGCGGGTGGGGGCTGGCGCGCCGGTGTACCTGGCGG

CGGTGCTGGAGTACCTGACGGCCGAGATCCTGGAGCTGGCGGGCAACGCGGCCCGCGACAACAAGAAGACGCGCATCATC

CCGCGCCACCTGCAGCTGGCCATCCGCAACGACGAGGAGCTCAACAAGCTGCTGGGCCGCGTGACCATCGCGCAGGGCGG

CGTCCTGCCCAACATCCAGGCCGTGCTGTTGCCCAAGAAGACCGAGAGTCATCACAAGGCCAAGGGCAAGTGA

>pig_H2A

ATGTCGGGCCGCGGAAAACAAGGTGGCAAGGCTCGTGCCAAAGCCAAGACTCGGTCTTCGCGGGCCGGCCTCCAATTCCC

CGTCGGCCGAGTGCACCGTTTGCTCCGAAAAGGCAACTACGCCGAGCGAGTCGGTGCCGGCGCACCAGTGTACTTGGCGG

CGGTGCTGGAGTACCTGACGGCTGAGATCCTGGAGCTGGCAGGCAACGCGGCTCGCGACAACAAGAAGACCCGCATTATC

CCGCGCCACCTGCAGCTGGCCATCCGCAACGATGAGGAGCTCAATAAACTGCTGGGCAAAGTTACCATCGCGCAGGGCGG

CGTCCTGCCCAACATCCAGGCTGTGCTCTTGCCCAAAAAGACGGAGAGCCACCACAAGGCCAAGGGCAAGTAA

***H2A.L* eight species**

>chineseHamster_H2A.L.3

ATGGAAGAGAAAAAGCGC------------------------AAGGAGACCATCTCCCGT

ATCACCAGAGGTCAGCTACAATTCTCTCTAGATCGAATAGAACGCTTCTTCCGAGACGGA

AACTTCTCTCAACGCCTGAGCGCTTCTGCACCTGTGTTCCTGGCCGGTGTGCTCGAGTTC

TTGACATCCAACATTTTGGACCTGGCAGGCAGGGAGGCCCACGCCAACGGCACAAGGCTC

ATAACCCCAGAGCACGTGACCCAGGTAGTCCAGAACAATGATCAGCTTCGAGAAGTCTTC

AAAGAGCATGAGGACCCTGTGGTC------------TCTGAGACA---------------

CCAGAACCTGAGAAGAACTAA

>Rat_H2AL.2

ATGGCCGGGAAAAGGCGA------------------------AGACGGAACATATCCCGC

TCAAGAAGAGCTGAGCTTCAGTTTCCAGTCAGCCGTGTAGACCGCTTCCTCCGGGAGGGA

AACTATTCTAGACGGCTGAGTTCCTCTGCACCCGTGTTCCTTGCGGGTGTTCTCGAGTAC

CTGACATCCAACATCCTTGAACTGGCTGGTGAAGAGGCCCACACCAGTGGCAGGAAGCGC

ATATCTCCAGAACATTTGTGCCGGGTGGTACAGAACAACGACCAGCTCCACCAACTCTTC

AAAGAAGGCACCAAGTCTGTG---------------TTTGAGTCA---------------

GCAGATCCTGATGAGAACTGA

>Mouse_H2A.L.2

ATGGCCAAGAAAATGCAA---------------AGGCGAAGAAGACAGAAAAGAACCCGC

TCCCAGAGAGGTGAGCTT------CCTCTTAGCCTTGTAGATCGTTTCCTACGAGAGGAA

TTCCATTCCAGTCGCCTGAGCTCTTCCGCACTTTCATTCCTCACGAGTGTGCTCGAGTAC

TTAACATCGAACATCCTCGAACTGGCTGGTGAGGTGGCCCACACCACTGGCAGGAAGCGC

GTAACTCCAGAGGATGTACGTCTGGTGGTACAGAACAACGAACAGCTCCGCCAACTCTTC

AAACCAGGTGGCACATCAGTG---------------AATGAG------------------

---------GATGACAACTGA

>Pig_H2A.L.3

ATGTCTCGGAAAAGAAACCTCCCGCAATGCAGTCATCGTAAGAAGCACGCCCTCTCGTGC

TCCTCAAGAGCAGAGCTGCAATTCCCAATGAGCAGCTTGGACTGCGTCCTGCCAGAGGGT

CAGTATGCGCAGCGCTTGAGCTCATATACCCCTGTGTTCCTCGCCGGCGTCCTCGAGCAC

CTGATGGCACACATCTTGGAGTTGGCGGCCAGAGAGGCCCGCAGCAGCCGCAAGGTGCGC

ATCACCCCCGAGCACGTGCAGAGAGCCTTGAACAACAACGAGACCCTCAGCCGCCTCTTC

CAGGCCAGCAGCGTTTCCCGGGGGGCTGAGGAGGGGGCTGAGGAGCCCGGGGCCGAGGAG

CCCCTGCCC------------

>leopard_H2A.L.1

ATGTCTGGGAGGCACCGCCGCCGGCACCGTCGCAGACGGAGGAGGCACGCGGTGTCCCGC

TCCAGGAGAGCCGAGCTGCAATTCCCGGTCAGCCGCGTGGAGCGTCTCCTGCGAGAGGGT

CGCTACGCCCCGCGCCTGAGCGCGTCCACCCCGGTCTTCCTGACCGCCGTTCTCGAGTAC

CTGACGGCCAACATCCTGGAGCTGGCGGGCAAGGAGGCTCTGGACAGCCACAAGATGCGC

ATCACCCCGGAGCACGTGCAGCGAGCCCTGGGCAGCAACCAGCACCTCAGGGGTCTCCTC

GAGAACACCACCTCCCCTCGGGTG------------GATGGGCTG---------------

CCCCGAGTTCGGAAGTGGTGA

>panda_H2A.L.3

ATGTCTGGAAGGAGAAGCCCCTGGCACTCTCACCAACATAAGAGGCACGGTCTGTCCCGC

TCCATGAGAGCCAAGCTCCAGTTCCCGGTTAGCCGCGTGGACCGCCTCCTGCGGGAGGGT

TGCTATGCCCAGCGCCTGAGCTCATCCACACCGGTCTTCCTCACTGGCGTTCTCGAGTAC

CTGACGGCCAACATCCTGGAGCTGGCGGGCCAGGAGGCCCGCAACCACCACAAGATGCGC

ATCACCCCGGAGCACGTGCAGAGGGCCCTGGTGAACAACCAGCACCTGAGCTGCCTCTTT

GAAGACATCACCTCCCCGCCGGCC------------AAAGGGACG---------------

CCCCAGCTCAGGAAGTGC---

>rhino_H2A.L.3

ATGCCTGGGAAGAGAAGTCGCCAGCTCTCGCTTAGGCGTAAGAGGCAGGCCCAATCCCGC

TCTACGAGAGCTGAGCTGCAGTTCCCCGTTAGCCGCGTGGACCACTTCCTGCGACAGGGT

CCCTATGGCCAGCGCCTGAGCTCGTCCACACCTGTTTTCCTCGCTGGTGTTCTCGAATAC

CTGACGGCCAATATCCTGGAGCAGGCGAGCAAGGAGGCCCACAGCAGCCGAAAGATCCGC

ATCACCCCAGAACACGTGCAGAGGGCCGTAGACAACAACCTGAACCTCAGCCACCTCTTT

GAGAATGACACCTACCGTCAGGAT------------GAGCAGATG---------------

CCACAACCCAGTAGGAAGTGA

>Armadillo_H2A.L.3

ATGCGTGGGAAAAAGAGCCGCCAGAGTACCTATTGGCGCAGGAGGCCAGCCCTCTCCCGC

TCCACAAGAGCAGAGCTGCAGTTCCCCGTCAGCCGTGTGGACCGTGTTCTGCGGGAGAGC

CACTGTGCCCAGCGCCTGAGCCTGTCCACACCGGTTTTCCTCGCTGGCATTCTGGAATAC

CTGACGGCCAATGTCCTGGAGCTGGCGAGCCACGAG------ACCGGCCAGAGGAAGCGC

ATCACCCCAGAGAACGTGGAGAAAGCCGTGAGCAAGAACCCACAGCTCAGCCGCGTCTTT

GGGGATGACATCAACCCGCAGGGT------------GATTATATG---------------

CCTCACCCTAGGAATAAC---

***H2A.P* eight species**

>Mouse_H2AP

ATGTCGGAGAAGAAGAGCCAAGAAAAGCCTTGCAGCGACAACAACCAGATAGAAGATCCT

TCTTCTAGGCCTGAGGTACAGGTTCCTGTGAATTATGTGTACCGTATACTGCAGGAGGAG

CAATATACCCCCTGCATAGGGTCCACAACTTCAGATTTCCTTCTTGCCATGCTTGATTAC

CTCACCGACTACATCCTGGAGGTGGTGGGCTCCGAAGCC---AACATCAACAACCAGCAA

AATATCTCACAAGATAGAGAGAGACAGAGAGACAACGACCGCGAACCCTCTCGAGGCTTC

AAGAATGCGCCTTTCTCTCTGTTTGACGAGATGCCTGGACCCAGAAGGAATGGCTAA

>Rat_H2AP

ATGTCGGGGAAGAAGAGCCAAGAGAAGGCTTGCAGCGACAACAAGCAGACGGAAGATCCT

TCTTCTAGGCCTGAGGTACAGGTGCCTGTGAACTATGTGTACCGCCTACTGCAGGAGGAG

CAATACACCCCCTGCCTAGGTTCCACAACTTCTGACTTCCTCCTTGCCATGCTTGATTAC

CTTACCGACTACATCCTGGAGGTGGTGGGCTCCGAAGCC---AACATCAACAGCCAGCAA

AATATTTCACAAGATAGAGAGAGACAGAGAGAGAATGACCGTGAACCCCCTCAAGCCTTC

AAGAATGCGCCTTTCTCTCTGTTTGATGAGATGCCTGGACCCAGAAGGAATGGCTAA

>chineseHamster_H2AP

ATGTCAGGGAAGAAGAACCAAGGAAAGTCTTGCAGTGACAACAAGAAGATGGAAGATCCT

TCTTCTAAGCCCGAGGTACAGATTCCTGTGAACTATGTGTACCATCTACTGCAGGAGGAG

CAATATACACCCTGCCTAGGCTCTACCACTTCAGATTTCCTCCTCGCCATGCTTGATTAC

ATTACTGACTATATCCTGGAGGTGGTGGGCTCCGAAGCC---AACATCAACAGCCAGCAA

GACATCCCACAAGACAGAGAGAGGCAAGGGGACAACGACCATGACCATTCTCATGCCTTC

AAGAATGCACCTTTCTCTCTGTTTGATGAGATGCCTGGACCCAGAAGGAATGGCTAA

>Pig_H2AP

ATGTCAGGAAAACAAAGCCCCGAGGGCTCTTAT------------GAGGCTCCAACTCAT

CTTACAACAACCGAGCCACAGGTCCCTGTGAGCTTCGTGGACCATCTTCTGCAGGAAGAT

CAGTATGTCCACACTCTGAGTTCATCCACAACACATTTCCTCTTCTCCGTGCTCGAATAC

CTTACCGACTACATCCTGGATCTGGTAGACACTAAGGCC---AACACCGGCAGGATGCAG

ATGACCCCACAAGACGTGGAGAGGGCAGTGGACAGCAACGCAGAGCCCCATCGGCAGGTG

AAGGATACAGCTTTTGCTCTGTTTGATGAAATGCCTGGATCCCGAAGGAATGGCTGA

>leopard_H2AP

ATGTCGGGGAAAAAAATCCAGGCGAGCTCCTGT------------CAGACTCCATCCCAT

CTTATAAGAAGTGAGCTACAGTGTCCTTTGAGCTACGTGGACCGCCTCCTGCTTGAGGAT

CAACATACCCAAGGCTGGAATTCATCCACAAATCATTTCCGCCTTACCATGCTTGACCAC

CTTACTGACTACATCCTACAGATGGTAGCCAATGAGGCC---ATCAATAGCAATATGCAC

ACCGTCCCACAAGAT---GATAGAGGCGTTGGCAGCAACGGACAGCGCCCCCAAAACTTG

AAGAATGTGAGCTTCACTCTGTTTGATGAGATGCCTGGACCCAGGAGAAGTGGCTAA

>Panda_H2AP

ATGTCAGGAAAGAAAAGCCATGAGAGCTCTTAT------------CAGACTCAAGCCCAT

CTTATAACAACCGAGCTCCAAGTCCCTGTGAGCTACGTGGACCGCCTCCTGCAGGAGAAT

CAATACAACCATCCCCTGAGTTCATCCACAACTGATTTCCTCCTTACCATGCTCGACTAC

CTCACTGATTACATCCTGGACGTGGTAGGCACTGAGGCC---AACAACAGCAACATGCCG

ACTGCCCCACAAGATGTGGAGAGAGCAGTGGACAGCAGCGGAGAGCCCTACCACCGCTCG

AAGGATACAGCCTTCACGCTGTTTGATGAGATGCCTGGATCCAGAAGAAATGGC---

>rhino_H2AP

ATGGCAGAAGAGCAGAACCGTGACAGCTCCTAT------------CAGACTCGAGCCTGT

CTTCCAACAGCCGAGCTACAGTTTCCTGTGAGCTACCTGGACCGCCTTCTGCAGAAAGAT

GAACACGCCCAGCATCCGAGTTCATCCACAGAAGATTTCCTCGTTGCCATGCTCGACTGC

CTTACCGACTACATCCTGGAGATGGTAGGCAACGAGGCC---------ACCAATAGCAGT

AGCGTCGCACAAGATGTGGAGGGAGGAGTGAACAACAACAGAGAGCCCCAGCGCCAAGTG

AAGGATGCGGCCTTCACTCTGTTTGACAAGATGCCCGGAGGCAGGAAGAACGGCTGA

>Aramdillo_H2AP

ATGTCGGGGAAAAGAAGCCATGAGAGCTCCCACAATCGTAGAACGCTGACTCCCTCCCTC

TCTGCAAGAACTGAGATGGAGTTCTCTCCGAGTGGCCTGGAACGCCTTCTGCAGGAGGAC

CGTTATGCCCAGTACCTGCGCTCAAACACACCGGACTTTCTTCTTGCCTTTCTCGACTAC

CTTACCACCTACATCCTAGAACTGGCAGCCAATGAGGCCCACAACAACCATCGGAGTCAT

ATCGCGCCACTGGATGTGGAGAGAGGAGTGCGCAACAACCGGCTGCTCCGCCACCTCTTG

AGGGGTGTGAACTTCTCTCAGAGTGATGAGATGTTCCATTCCAGGAAGAACGGCTGA

**Primate *H2A.B* for PAML**

>crabEatingMacaque_H2A.B.2

ATGTCGGAGAGGAGGAGCCATCGCCGGTCCTCCAGGGCTGGTGGCCGGGGGCGGACCCGC

TCTCGCACCGTCCGAGCGGAGCTTTCGTTTTCGGTGAGCCAGGTGGAGCGCGGTCTACGG

GAGGGCCACTACGCTCAGCGCCTGAGTCCCACGGCGCCGGTCTACCTCGCTGCGGTTATC

GAGTACCTGACGGCCAAGGTCCTGGAGCTGGCGGGCAACGAGGCCCAGAACAACGGAGAG

AGGAACATCACTCCACTGCTGCTGGACATGGCGGTTCACAACAACAGGCTGCTGAGCACC

CTTTTTGACACAACCACCATCTCTCAAGTGGCCCCCGGCGGGGAC

>rhesusMacaque_H2A.B.1.1

ATGTCGGAGAGGAGGAGCCATCGCCGGTCCTCCAGGGCTGGTGGCCGGGGGCGGACCCGC

TCTCGCACCGTCCGAGCGGAGCTTTCGTTTTCGGTGAGCCAGGTGGAGCGCGGTCTACGG

GAGGGCCACTACGCTCAGCGCCTGAGTCCCACGGCGCCGGTCTACCTCGCTGCGGTTATC

GAGTACCTGACGGCCAAGGTCCTGGAGCTGGCGGGCAACGAGGCCCAGAACAACGGAGAG

AGGAACATCACTCCACTGCTGCTGGACATGGCGGTTCACAACAACAGGCTGCTGAGCACC

CTTTTTGACACAACCCCCATCTCTCAAGTGGCCCCCGGCGGGGAC

>oliveBaboon_H2A.B.1.1

ATGTCGGGGAGGAGGAGCCATCGCCGGTCCTCCGGGGCTGGTGGCCGGGGGCAGACCCGC

TCTCGCACCGTCCGAGCGGAGCTTTCGTTTTCGGTGAGCCAGGTGGAGCGCGGTCTACGG

GAGGGCCACTACGCTCAGCGCCTGAGTCCCACGGCGCCGGTCTACCTCGCTGCGGTTATC

GAGTACCTGACGGCCAAGGTCCTGGAGCTGGCGGGCAACGAGGCCCAGGACAACGGAGAG

AGGACCATCACTCCACTGCTGCTGGACAGGGCGGTTCACAACAACAGGCTGCTGAGCACC

CTTTTTGACACAACCATCATCTCTCAAGTGGCCCCCGGCGGGGAC

>greenMonkey_H2A.B.1.2

ATGTCGGGGAGGAGGAGCCATCGCCGGTCCTCCGGGGCTGGCGACCGGGGGCGGACCCGC

TCTCGCACCGTCCGAGCGGAGCTTTCGTTTTCGGTGAGCCAGGTGGAGCGCGGTCTACGG

GAGGGCCACTACGCTCAGCGCCTGAGTCCCACGGCGCCGGTCTACCTCGCTGCGGTTATC

GAGTACCTGACGGCCAAGGTCCTGGAGCTGGCGGGCAACGAGGCCCAGAACAACGGAGAG

AGGAACATCACTCCACTACTCCTGGACATGGCGGTTCACAACAACAGGCTGCTGAGCACC

CTTTTTCACACAACCACCATCTCTCAAGTGGCCCCCGGTGGGGAC

>blackAndWhiteColobus_H2A.B

ATGTCGGGGAGGAAGAGCCATCACCGGTCCTCCGGGGCTGGCGGCCGGGGGCGGACCTGC

TCTCGCACTGTCCGAGCGGAGCTTTCGTTTTCGGTGAGCCAGGTGGAGCGCCGTCTACGG

GAGGGCCACTACGCTCAGCGCCTGAGTCCCACGGCGCCGGTCTACCTCGCTGCGGTTATC

GAGTACCTGAGGGCCAAGGTCCTGGAGCTGGCGGGGAACGCGGCCCAGAACAACGGAGAG

AGGAACATCACTCCACTGCTACTGGACATGGCGGTTCACAACAACAGCCTGCTGAGCACC

CTCTTTGATACAACCACTTTCTCTCAAGTGCCCCCCGGCGGGGAC

>snubNosedMonkey_H2A.B.2

ATGTCGGGGAGGAGGAGCCATCGCCGGTCCTCCGGGGCTGGCGGCCGGGGGCGGACCTGC

TCTCGCACCGTCCGAGTGGAGCTTTCGTTTTCGGTGAGCCAGGTGGAGCGCGGTCTACGG

GAGGGCCACTACGCTCAGCGCCTGAGTCCCACGGCGCCGGTCTACCTCGCTGCGGTTATC

GAGTACCTGACCGCCAAGGTCCTGGAGCTGGCGGGGAACGAGGCCCAGAACCACGGAGAG

AGGAACATCACTCCACTGCTACTGGACATGGCGGTTCACAACGACAGCCTGCTGAGCACC

CTCTTTGACACAACCACTATCTCTCAAGTGGCCCCCGGCGGGGAC

>talapoin_H2A.B

ATGTCGGGGAGGAGGAGCCATCGCGGGTCCTCCGGGGCTGGCGGCCGGGGGCGGACCCGC

TCTCGCACCGTCCGAGCGGAGCTTTCGTTTTCGGTGAGCCAGGTGGAGCGCGGTCTACGG

GAGGGCCACTACGCTCAGCGCCTGAGTCCCACGGCGCCGGTCTACCTCGCTGCGGTTATC

GAGTACCTGACGGCCAAGGTCCTGGAGCTGGCGGGCAACGAGGCCCAGAACAACGGAGAG

AGGAACATCACTCCACTGCTGCTAGACATGGCGGTTCACAACGACAGGCTGCTGAGCACC

CTTTTTCACACGACCACCATCTCTCAAGTGGCCCCCGGCGGGGAC

>siamang_H2A.B

ATGCCGAGGAGGAGGAGCCACCGAGGGTCCTCCGGTGCTGGCGGCCGGGGGCGGACCTGC

TCTCGCACCGTCCGAGCGGAGCTTTCGTTTTCGGTGAGCCAGGTGGAGCGCGGTCTACGG

GAGGGCCACTACGCTCAGCGCCTGAGTCGCACGGCGCCGGTCTACCTCGCTGCGGTTATT

GAGTACCTGACGGCCAAGGTCCTGGAGCTGGCGGGCAACGAGGCCCAGAACAACGGAGAG

AGGAACATCACTCCCCTGCTGCTGAACATGGTGGTTCACAACAACAGGCTGCTGAGCACC

CTTTTCGACACAACCACCATCTCTCAAGTGGCCCCCGGCGGGGAC

>whiteCheekedGibbon_H2A.B.1.1

ATGCCGAGGAGGAGGAGCCACCGAGGGTCCTCCGGTGCTGGCGGCCGGGGGCGGACCTGC

TCTCGCACCGTCCGAGCGGAGCTTTCGTTTTCGGTGAGCCAGGTGGAGCGCGGTCTACGA

GAGGGCCACTACGCTCAGCGCCTGAGTCGCACGGCGCCGGTCTACCTCGCTGCGGTTATT

GAGTACCTGACGGCCAAGGTCCTGGAGCTGGCGGGCAACGAGGCCCAGAACAACGGAGAG

AGGAACATCACTCCCCTGCTGCTGGACATGGTGGTTCACAACAACAGGCTGCTGAGCACC

CTTTTCCACACAACCACCATCTCTCGAGTGGCCCCCGGCGGGGAC

>human_H2A.B.1.1

ATGCCGAGGAGGAGGAGACGCCGAGGGTCCTCCGGTGCTGGCGGCCGGGGGCGGACCTGC

TCTCGCACCGTCCGAGCGGAGCTTTCGTTTTCAGTGAGCCAGGTGGAGCGCAGTCTACGG

GAGGGCCACTACGCTCAGCGCCTGAGTCGCACGGCGCCGGTCTACCTCGCTGCGGTTATT

GAGTACCTGACGGCCAAGGTCCTGGAGCTGGCGGGCAACGAGGCCCAGAACAGCGGAGAG

CGGAACATCACTCCCCTGCTGCTGGACATGGTGGTTCACAACGACAGGCTACTGAGCACC

CTTTTCAACACGACCACCATCTCTCAAGTGGCCCCTGGCGAGGAC

>chimpanzee_H2A.B.1.2

ATGCCGAGGAGGAGGAGACACCGAGGGTCCTCCGGTGCTGGCGGCCGGGGGCGGACCTGC

TCTCGCACCGTCCGAGCGGAGCTTTCGTTTTCAGTGAGCCAGGTGGAGCGCAGTCTACGG

GAGGGCCAGTACGCTCAGCGCCTGAGTCGCACGGCGCCGGTCTACCTCGCTGCGGTTATT

GAGTACCTGACGGCCAAGGTCCTGGAGCTGGCGGGCAACGAGGCCCAGAACAGCGGAGCG

CGGAACATCACTCCCCTGCTGCTGGACATGGTGGTTCACAACGACAGGCTACTGAGCACC

CTTTTCAACACGACCACCATCTCTCAAGTGGCCCCCGGCGAGGAC

>gorilla_H2A.B.1.1

ATGCCGAGGAGGAGGAGACATCGAGGGTCCTCCGGTGCTGGCGGCCGGGGGCGGACCTGC

TCTCGCGCCGTCCGAGCGGAGCTTTCGTTTTCAGTGAGCCAGGTGGAGCGCAGTCTACGG

GAGGGCCACTACGCTCAGCGCCTGAGTCGCACGGCGCCGGTCTACCTCGCTGCGGTTATT

GAGTACCTGACGGCCAAGGTCCTGGAGCTGGCGGGCAACGAGGCCCAGAACAGCGGAGAG

CGGAACATCACTCCCCTGCTGCTGGACATGGCGGTTCACAACGACAGGCTGCTGAGCACC

CTTTTCAGCTCGACCACCATCTCTCAAGCGGCCCCTGGCGAGGAC

>orangutan_H2A.B.2

ATGCCGAGGAGGAGGAGCCATCGAGGGTCCTCCGGTGCTGGTGGCCGGGGGCGGACCTGC

TCTCGCACCGTCCGAGCGGAGCTTTCGTTTTCGGTGAGCCAGGTGGAGCGCAGTCTACGG

GAGGGCCACTACGCTCAGCGCCTGAGTCGCACGGCGCCGGTCTACCTCGCTGCGGTTATT

GAGTACCTGACGGCCAAGGTCCTGGAGCTGGCGGGCAACGAGGCCCAGAACAACGGAGAG

AGGAACATCACTCCCCTGCTGCTGGACATGGTGGTTCACAACAACAGGCTGCTGAGCACC

CTTTTCGACACAACCACCATCTCTCAAGTGGCCCCCGGCGGGGAC

>squirrelMonkey_H2A.B

ATGTCGGAGAGGAGGAGCCGTCGAGGGTCCTCTGGTGCTGGCGGCCGGAGGCACACCCGC

TCTCGCACCGCCCGAGCGGAGGTTTTGTTTTCTGTGAGCCAAGTGGAGCGTAGTCTACGG

GAAGGCCACTACGCCCAGCGCCTGAGTCCCTGTGCGCCAGTCCACCTCGCTGTCGTGATT

GAGTCCCTCACGGCCCAGATCCTGGAGCTGGCGGGCAAGGAGGCCCACAACAGCGGAGAC

ACGACCATCACTCCGCAGCTGCTGCACATGCCGGTTCACAACAACGCGCTGCTGAGCACC

CTCTTTGACACAACCACCATCTCTCAAGTGGTTCCCGGCCGGGAC

>marmoset_H2A.B.1.1

ATGTTGGGGAGGAGGAGCCGTCGAGGGTCCTCTGGTGCTGGCGGCCGGGGGCATACCCTC

TCTCGCACCGCCCGAGGGGAGCTTTTGTTTTCTGTGAGCGAGGTGGAGCGTAGTCTACAG

GAAGGCCAGTGCGCCCAGCGCCTGAGTCCCTCTGCGCCAGTCTTCCTCGCTGCCGTGATT

CAGTACCTGACGGCCCAGATCCTGGAGCTGGCGGGCAAGGAGGCCCACAACAACGGAGAG

AGGACCATCACTCCACAGCCGCTGGACATGGCGGTTCACGACAACGCGCTGCTGAGCACC

CTCTTTGACACAACAACCGTCTCTCAAGTGGTTCCCGGCCGGGAC

>nightMonkey_H2A.B

ATGTCGGAGGGAAGGCGCCATCGAGGGTCCTCTGGTGCTGGCGGCTGGGGGCATACCCGC

TGTCGCACCGCCCACACGGAGGTTTCGTTTTTTGTGAGTGAGGTGGAGCGTGGTCTATGG

GAAGACCGCTACGCCCAGCGCCTGAGTCCCTCTGCGCCAGTCTACCTCGCTGCCGTGATT

GAGTACCTGACGGCCCAGATCCTGGAGCTGGCGGGCAAGGAGGCCCACAACAATGGAGAG

AGGACCATCACTCCACGGCTGCTGGACATGGCGGTTCACAACAACGCACTGCTGAGCACC

CTCTTTGACACAAGAACCATCTCTCAAGTGGCTCCCGGCCGGGAC

>spiderMonkey_H2A.B

ATGTCGGAGAGGAGGAGCCGTCGAGGGTCCTCTGGTGCTGGCGGCCGGGGGCATACCCGC

TCTCGCACCGCCCGAGCGGAGCTTTTGTTTTCTGTGAGCGACGTGGAGCGCAATCTACGA

GAAGGCCACTACGCCCAGCGCCTGAGTCCCTCTGCGCCAGTCTACCTCGCTGCGGTGATT

GAGTACCTGACGGCCCAGATCCTGGAGCTGGCGGGCAAGGAGGCCCGCAACCGCGGAGAG

AGGACCATCACTCCGCAGCTGCTGGACATGGCAGTTCACAACAGCGCGCTGCTGAGCGCC

CTCTTTGACACAACCACCATCTCTCAAGTGGTTCCCGACCGGGAC

>woollyMonkey_H2A.B

ATGTCGGCGAGGAGGAGCCGTCGAGGGTCCTCTGGTGCTGGAGGCCGGGGGCGTACCCGC

TCTCGCACCGCCCGAGCGGAGCTTTTGTTTTCTGTGAGCGAGGTGGAGCGCGATCCACGG

GAAGGCCACTACGCCCAGCGCCTGAGTCCCTCTGCGCCAGTCTACCTCGCTGCGGTGATT

GAGTACCTGACGGCCCAGATCCTGGAGCTGGCGGGCAAGGGGGCCCACAACCACGGAGAG

GGGACCATCACTCCGCAGCTGCTGGACGTGGCAGTTCACAACAACGCGCTGCTGAGCGCC

CTCTCTGACACAACCGCCCTCTCTCAAGTGGTTCCCGACCGGGAC

>howlerMonkey_H2A.B

ATGTCGGAGAGGAGGAGCCGTCGAGGGTCCTCTGGTGCTGGCGGCCGGGGCCGTACCCGC

TCTCGCACCGCCCGAGCGGAGCTTTTGTTTTCTGTGAGCCAGGTGGAGCGCAGTCTACGG

GAAGGCCACTACGCCCAGCTCCTGAGTCCCTCTGCGCCAGTCTACCTCGCTGCGGTGACT

GAGTACCTGGCGGCCCACATCCTGGAGCTGGCGGGCAACGAGGCCCACAACCACGGAGAG

AGGATCATCACTCCGCGGCTGCTGGACATGGCGGTTCACAACGACGTGCTGCTGAGCGCC

CTCTTTGACACAACCACCATCTCTCAAGTGGTTCCGGACCGGGAC

>saki_H2A.B

ATGTCGGAGAGGGGGAGCCGTCGAGGGTCCTCTGGTGCTGGAGGCCGGGGGCATACCCGC

TCTCGCACCGCCCGAGCGGAGCTTTTGTTTTCTGTGAGCGAGGTGGAGCACAGTCTACGG

GAAGGCCACTACGCCCAGCGCCTGAGTCCCTCTGCGCCAGTCTACCTCGCTGCGGTGATT

GAGTACCTGACGGCCTACGTCCTGGAGCTGGCGGGCAAGGAGGCCCACAACAACGGGGAG

AGGACCATCACTCCGCGGCTGCTAGACATGGCGGTTCACAACAACGCGCTGCTGAGCACC

CTCTTTGACACAACCACCATCTCTCAAGTGGTTCCCGGCCAGGAC

>capuchin_H2A.B.b

ATGTCGGAGAGGAGGAGCCGCAGAGGGTCCTCTGGTGCCCGCCGCCGGCGGCATACCCGC

TCGCGCACTGCCCGAGCGGAACTTCTATTTTCGGTTGGCCACATGGAGCGCAGTCTACGG

GAAAGCCACTACGCCCAGTGCCTGAGTCACAACGCGCCAGTCTACCTCGCTGCGGTGATT

GAGTATCTGACGACCAAGATCCTGGAGCTGGCGGTCAAGGAGGCCCAAAACAACGGTGAG

AGGATCATCACTCCGCGGCTGTTGGACATGGCGGTTCATAATAACGGGCTGCTGAGCACC

CTCTTTCATACAACAACCATCTCTCAAGTGGCTCCCGGCCCGAAC

**Primate *H2A.L* for PAML**

>Sifaka_H2A.L.1

ATGTCTGGGAAAAAAAGGAGTCGAGGATCCCATAGGCGTAGGAGGCAGGCCATCTCCCGC

TCCACAAGGGCAGAGCTGCAGTTCCCGGTTAGCCGCGTGGACCGCCATCTGCGAGAAGGT

CGCTATGCCCGGCGCCTGAGCTCGGCCACTCCCGTTTTCCTCTCCAGCGTTCTGGAGTAC

CTGACGGCCAACATCCTGGAGCTGGCGGGCCAGGAGGCCGACAACAACCGCAGGGTGCGC

ATCACCCCCGAACACGTGGAGAGGGCAGTGGACCAGAACCAGCAGCTCAGCTGTCTCTTT

GAG------GAAGACACCCACTCCCAGGTT

>Human_H2A.L.1.longORF

ATGGCTGGAAACAAACACAGTCGCAGCTCCTGTAAGCCTAGAAGACAGTGCCTTTCCCGT

TCCAGAAGAGCGGAGCTGCAGTTTCCTGTTAGCCACATGGAACGCTGCCTGCGAGAAGGT

CAGTATGCCCGGCACCTGAGCTCAACCACACCTGTTTTCCTGGCTGCTGTTCTCGAGTAC

CTGACAGCCAACATCCTGGAACAGGCAGGCAAGGAGGCCCAGAACAGCCACAGGGTGTGC

ATCACCCCAGAACACCTGAAGAGAGCACTGCAAAAGAATGAGCAGCTAAGATGGATCTTG

GAGGAGGAAGATGACATCCACTCTCAGGAA

>Macaque_H2A.L.1.longORF

ATGGCTGGAAACAAACACAATCGCAGCTCCTGTAAGCCTAGAAGACAACGCCGTTCCCAT

TTCAGAAGAGCAGAGCTGCAGTTTCCTGTTAGCCACGTGGAACGCTGCCTGCGAGAAGGT

CAGTATGCCCGACGCCTGAGCTCAACAACACCTGTTTTCCTGGCTGGTGTTCTCCAGTAC

CTGACAGCCAACATCCTGGAACAGGCAGGGAAGGAGGCCGAGAACAGCCACAGGGTGTGC

ATCACTCCAGAACACGTGAAGAGGGCACTGCAAAAGGATGAACAGCTCAGATGGCTCTTG

GAGAAGGAAGATGACACCCATTCTCAGGAA

>Baboon_H2A.L.1.longORF

ATGGCTGGAAACAAACACAATCGCAGCTCCTGTAAGCCTAGAAGACAACGCCGTTCCCGT

TTCAGAAGAGCAGAGCTGCAGTTTCCTGTTAGCCACGTGGAATGCTGGCTGCGAGAAGGT

CAGTATGCCCGACGCCTGAGCTCAACAACACCTGTTTTCCTGGCTGGTGTTCTCCAGTAC

CTGACAGCCAACATCCTGGAACAGGCAGGGAAGGAGGCCGAGAATAGCCACAGGGTGCGC

ATCACTCCAGAACACGTGAAGAGGGCACTGCAAAAGGATGAACAGCTCAGATGGCTCTTG

GAGAAGGAAGATGACACCCATTCTCAGGAA

>Gibbon_H2A.L.3.longORF

ATGGCTGGAAACAAACACAGTCGCAGCTCCTGTAAGCCTAGAAGACAGCGCCTTTCCCGT

TCCAGAAGAGTAGAGCTGCAGTTTCATGTTAGCCACATGGTACGCTGCCTGCAAGAAGGT

CAGCATGCCCGGCACCTGAGCTCAACCACACTTGACTTCTTGGCTACTGTTCTCCAGTAC

CCGATAGCCAACATCCTGGAACAAGCGGGCACGGAGGCCCAGAACAGCCACACGGTGGGG

ATCACCATGGAACACCTGAAGAGAGGACTATCAAAGAATCAAGAGCTCAGATGGATCTTG

GAGGAGGAAGACGACACTGACTCTCAGGAA

>Human_H2A.L.3.longORF

ATGGCTGGAAACAAA---------ATGTTCTGTAGGCCTAGGAGACAACGCCTTTCCCAT

TCCAGAAGAGCAGAGCTGCAGTTTCCTGTCAGCCACTTGGAACGCTGCCTGCGAGAAAGT

CAGCATGCCCGGCACCTGAGCTCAACCACACCTGTTTTCCTGGCTGGTGTTCTCGAGTAT

CTGACAGCCAACATCCTGGAAAAGGTGGGCAAGGAGGTCAAGAACAGCTGCAGGCTGTGC

ATCACCCCAGAACACGTGAAGAGGGCACTGCAAAAGGATGAGCAGCTCAGATGGATCTTG

GAGTTGGAAGATGACACCCACTCTCAAGTA

>Marmoset_H2A.L.1

ATGGCTGGGAAGAAGAGCAGTCATAGCTCCTGTAAGCCTAGGAAACAGCGCCGTTCCCGT

TCCAGCAGAGCAGGGCTGCAGTTTTCTGTCAGCCGCGTGGAACGCTCCCTGCGAGAAGGT

CGGTATGCCCGGCGCCTGAGCACAACCACGCCTGTTTTCCTGGCTGGTGTTCTGGAGTAC

CTGATGGCCAACATCCTGGAGCAGGCGGGCAAGGAGGCCGAGAACAGCGGCATGATGCGC

ATCACCCCGGAACACGTGCAGAGGGCACTGCAAAAGAACGAACAGCTCAGACAAATCTTG

AAGTTGGAAGATGTCACCCAGTCTCAGGTA

>Marmoset_H2A.L.3-1

ATGGCTGGGAAGAAGAGCAGTCATAGCTCCTGTAAGCCTAGGAAACAGTGCCGTTCCCGT

TCCAGCAGAGCAGGGCTGCAGTTTTCTGTCAGCCGCGTGGAACGCTCCCTGCGAGAAGGT

CGGTATGCCCGGCGCCTGAGCACAACCACGCCTGTTTTCCTGGCTGGTGTTCTGGAGTAC

CTGATGGCCAACATCCTGGAGCAGGCGGGCAAGGAGGCCGAGAACAGCGGCATGATGCGC

ATCACCCCGGAACACGTGCAGAGGGCACTGCAAAAGAACGAACAGCTCAGACAAATCTTG

AAGTTGGAAGATGTCACCCAGTCTCAGGTA

>Marmoset_H2A.L.3-2

ATGGCTGGGAAGAAGAGCAGTCATAGCTCCTGTAAGCCTAGGAAACAGCGCCGTTCCCGT

TCCAGCAGAGCAAGGCTGCAGTTTTCTGTCAGCCGCGTGGAACGCTCCCTGCGAGAAGGT

CGGTATGCCCGGCGCCTGAGCACAACCACGCCTGTTTTCCTGGCTGGTGTTCTGGAGTAC

CTGATGGCCAACATCCTGGAGCAGGCGGGCAAGGAGGCCGAGAACAGCGGCATGATGCAC

ATCACCCCGGAACACGTGCAGAGGGCACTGCAAAAGAACGAACAGCTCAGACAAATCTTG

AAGTTGGAAGATGTCACCCAGTCTCAGGTA

>SquirrelMonkey_H2A.L_sqMonk1

ATGGCTGGAAAGAAAAACAGTCGCAGCTCCTGTAAGCCTAGGAGACAGCGCCGTTCCCGT

TCCAGCAGAGCAGAGCTGCACATTCCCGTCAGCCGCGTGGAGCGCTCCCTGCGAGAAGGT

CAGTACGCCCAGCGCCTGAGCGCAACAACACCTGTCTTTCTGGCTGGTGTTCTGGAGTAC

CTGACCGCCAACATCCTGGAGCAAGCGGGCCAGGAGGCCGAGAACAGCCGCAGGGTGCGT

ATCACCCCAGAACACGTGCAGAGGGCACTGCAAAAGGATGAACAGCTTAGATGGATCTTG

GAGCTGGAAGTTGACACCCCGTCTCAGGTA

>SquirrelMonkey_H2A.L_sqMonk2

ATGGCTGGAAAGAAAAACAGTCGCAGCTCCTGTAAGCCTAGGAGACAGCGCCGTTCCCGT

TCCAGCAGAGCAGAGCTGCACATTCCCGTCAGCCGCGTGGAGCGCTCCCTGCGAGAAGGT

CAGTACGCCCAGCGCCTGAGCGCAACAACACCTGTCTTTCTGGCTGGTGTTCTGGAGTAC

CTGACCGCCAACATCCTGGAGCAAGCGGGCCAGGAGGCCGAGAACAGCCGCAGGGTGCGT

ATCACCCCAGAACACGTGCAGAGGGCACTGCAAAAGGATGAACAGCTTAGATGGATCTTG

GAGCTGGAAGTTGACACCCCGTCTCAGGTA

>SquirrelMonkey_H2A.L.3

ATGGCTGGAAAGAAAAGCAGTTGTACCTCCTGTAAGCCTAAAAGACAGCGCCGTTCCCAT

TCCAGAAGAGCAGGGCTGCAGTTTTCAGTCAGCCACGTGGAACGCTCCCTGCGA---GGT

CAGTATGCCCGGCGCCTGAGCACAACCACGCCTGTCTTCCTGGCTGGTGTTTTGGAGTAC

CTGACGACCAGCATACTGGAGCAGGCGGGCCAGGAGGCCAAGAAGAGCGGCATGACGTGC

ATCACCCCAGAACATGTGCAGAGGGCACTGCAAAAGAATGAACAGCTCAGAAGAATCTTG

AAGTTGGAAGATGACACCCATTCCCAA---

>Sapajou_H2A.L.3

ATGGCTGGAAAGAAAAGCAGTCGTAGCTCCTGTAAGCCTAAGAGACAGCGCCGTTCCCAT

TCCAGAAGAGCAGGGCTGCAGTTTTCAGTCAGCCGCGTGGAACGCTCCCTGCGAGAAGGT

CAGTATGCCCGGCGCCTGAGCACAACCACGCCTGTCTTCCTGGCTGGTGTTCTGGAGTAC

CTGATGGCCAACATCCTGGAGCAGGCGGGCAAGGAGGCCGAGAAGAGCGGCATGACGTGC

ATCACCCCGGAACACGTGCAGAGGGCACTGCAAAAGAATGAACAGCTCAGAAGAATCTTG

AAGTTGGAAGATGACAGCCATTCCCAGGTA

>NightMonkey_H2A.L_nightMonk1

ATGGCTGGAAAGAAAAGCAGTTGTAGCTTCTGTAAGCCTAGGAGACAGCGCCGCTCCCGT

TCCAGAAGAGCAGGGCTGCAGTTTTCTGTCAGCTGCATGGAACGCTCCCTGCGAGAAGGT

CAGTATGCCCGGCGCCTGAGCACAGCCACACCTCTCTTCCTGGTTGGTGTTCTGGAGTAC

CTGACAGCCAGCATCCTGGAGCAGGCGGGCAAGGAGGCCAAGAAAAGCTGCAGGGTGCGT

ATCACCCCAGAACACGTGCAGAGGGCACTGGAAAAGAATGAACAGCTCAGAAGAATCTTG

AAGTTGGAAGATGACACCCAGTCTCAGGTA

>Pig_H2A.L.3

ATGTCTCGGAAAAGAAACCTCCCGCAATGCAGTCATCGTAAGAAGCACGCCCTCTCGTGC

TCCTCAAGAGCAGAGCTGCAATTCCCAATGAGCAGCTTGGACTGCGTCCTGCCAGAGGGT

CAGTATGCGCAGCGCTTGAGCTCATATACCCCTGTGTTCCTCGCCGGCGTCCTCGAGCAC

CTGATGGCACACATCTTGGAGTTGGCGGCCAGAGAGGCCCGCAGCAGCCGCAAGGTGCGC

ATCACCCCCGAGCACGTGCAGAGAGCCTTGAACAACAACGAGACCCTCAGCCGCCTCTTC

CAG------GCCAGCAGCGTTTCCCGGGGG

>ChineseHamster_H2A.L.3

ATGGAAGAGAAAAAGCGC------------------------AAGGAGACCATCTCCCGT

ATCACCAGAGGTCAGCTACAATTCTCTCTAGATCGAATAGAACGCTTCTTCCGAGACGGA

AACTTCTCTCAACGCCTGAGCGCTTCTGCACCTGTGTTCCTGGCCGGTGTGCTCGAGTTC

TTGACATCCAACATTTTGGACCTGGCAGGCAGGGAGGCCCACGCCAACGGCACAAGGCTC

ATAACCCCAGAGCACGTGACCCAGGTAGTCCAGAACAATGATCAGCTTCGAGAAGTCTTC

AAA------GAGCATGAGGACCCTGTGGTC

>Rat_H2A.L.2

ATGGCCGGGAAAAGGCGA------------------------AGACGGAACATATCCCGC

TCAAGAAGAGCTGAGCTTCAGTTTCCAGTCAGCCGTGTAGACCGCTTCCTCCGGGAGGGA

AACTATTCTAGACGGCTGAGTTCCTCTGCACCCGTGTTCCTTGCGGGTGTTCTCGAGTAC

CTGACATCCAACATCCTTGAACTGGCTGGTGAAGAGGCCCACACCAGTGGCAGGAAGCGC

ATATCTCCAGAACATTTGTGCCGGGTGGTACAGAACAACGACCAGCTCCACCAACTCTTC

AAA------GAAGGCACCAAGTCTGTG---

>Mouse_H2A.L.2

ATGGCCAAGAAAATGCAA---------------AGGCGAAGAAGACAGAAAAGAACCCGC

TCCCAGAGAGGTGAGCTT------CCTCTTAGCCTTGTAGATCGTTTCCTACGAGAGGAA

TTCCATTCCAGTCGCCTGAGCTCTTCCGCACTTTCATTCCTCACGAGTGTGCTCGAGTAC

TTAACATCGAACATCCTCGAACTGGCTGGTGAGGTGGCCCACACCACTGGCAGGAAGCGC

GTAACTCCAGAGGATGTACGTCTGGTGGTACAGAACAACGAACAGCTCCGCCAACTCTTC

AAA------CCAGGTGGCACATCAGTG---

>Leopard_H2A.L.1

ATGTCTGGGAGGCACCGCCGCCGGCACCGTCGCAGACGGAGGAGGCACGCGGTGTCCCGC

TCCAGGAGAGCCGAGCTGCAATTCCCGGTCAGCCGCGTGGAGCGTCTCCTGCGAGAGGGT

CGCTACGCCCCGCGCCTGAGCGCGTCCACCCCGGTCTTCCTGACCGCCGTTCTCGAGTAC

CTGACGGCCAACATCCTGGAGCTGGCGGGCAAGGAGGCTCTGGACAGCCACAAGATGCGC

ATCACCCCGGAGCACGTGCAGCGAGCCCTGGGCAGCAACCAGCACCTCAGGGGTCTCCTC

GAG------AACACCACCTCCCCTCGGGTG

>Panda_H2A.L.3

ATGTCTGGAAGGAGAAGCCCCTGGCACTCTCACCAACATAAGAGGCACGGTCTGTCCCGC

TCCATGAGAGCCAAGCTCCAGTTCCCGGTTAGCCGCGTGGACCGCCTCCTGCGGGAGGGT

TGCTATGCCCAGCGCCTGAGCTCATCCACACCGGTCTTCCTCACTGGCGTTCTCGAGTAC

CTGACGGCCAACATCCTGGAGCTGGCGGGCCAGGAGGCCCGCAACCACCACAAGATGCGC

ATCACCCCGGAGCACGTGCAGAGGGCCCTGGTGAACAACCAGCACCTGAGCTGCCTCTTT

GAA------GACATCACCTCCCCGCCGGCC

>Rhino_H2A.L.3

ATGCCTGGGAAGAGAAGTCGCCAGCTCTCGCTTAGGCGTAAGAGGCAGGCCCAATCCCGC

TCTACGAGAGCTGAGCTGCAGTTCCCCGTTAGCCGCGTGGACCACTTCCTGCGACAGGGT

CCCTATGGCCAGCGCCTGAGCTCGTCCACACCTGTTTTCCTCGCTGGTGTTCTCGAATAC

CTGACGGCCAATATCCTGGAGCAGGCGAGCAAGGAGGCCCACAGCAGCCGAAAGATCCGC

ATCACCCCAGAACACGTGCAGAGGGCCGTAGACAACAACCTGAACCTCAGCCACCTCTTT

GAG------AATGACACCTACCGTCAGGAT

>Armadillo_H2A.L.3

ATGCGTGGGAAAAAGAGCCGCCAGAGTACCTATTGGCGCAGGAGGCCAGCCCTCTCCCGC

TCCACAAGAGCAGAGCTGCAGTTCCCCGTCAGCCGTGTGGACCGTGTTCTGCGGGAGAGC

CACTGTGCCCAGCGCCTGAGCCTGTCCACACCGGTTTTCCTCGCTGGCATTCTGGAATAC

CTGACGGCCAATGTCCTGGAGCTGGCGAGCCACGAG------ACCGGCCAGAGGAAGCGC

ATCACCCCAGAGAACGTGGAGAAAGCCGTGAGCAAGAACCCACAGCTCAGCCGCGTCTTT

GGG------GATGACATCAACCCGCAGGGT

**Primate *H2A.P* for PAML**>human_H2A.P

ATGTCAGAGAAAAAGAACTGTAAGAACTCGTCTACAAATAACAACCAGACTCAAGACCCT

TCTAGAAATGAGCTACAGGTCCCTAGGAGCTTCGTGGACCGCGTTGTGCAAGATGAACGA

GACGTCCAAAGCCAGAGTTCCTCCACAATAAATACCCTCCTTACCTTGCTCGATTGCCTT

GCTGACTACATCATGGAGCGGGTAGGCTTGGAGGCCAGCAACAATGGCAGTATGCGCAAC

ACTTCACAAGATAGGGAGAGAGAAGTGGACAACAACCGTGAGCCCCACAGCGCTGAGAGT

GATGTGACTCGCTTTTTGTTTGATGAGATGCCCAAATCCAGGAAGAATGACTGA

>bonobo_H2A.P

ATGTCAGAGAAAAAGAACTGTAAGAACTCGTCTACAAATAACAACCAGACTCAAGACCCT

TCTAGAAATGAGCTACAGGTCCCTATGAGCTTCGTGGACCGCGTTGTGCAAGATGAACGA

GACGTCCAAAGCCAGAGTTCCTCCACAATAAATACCCTCCTTACCTTGCTCGATTGCCTT

GCTGACTACATCATGGAGCGGGTAGGCTTGGAGGCCAGCAACAATGGCAGTATGCGCAAC

ACTTCACAAGATAGGGAGAGAGAAGTGGACAACAACCGTGAGCCCCACAGCGCTGAGAGT

GATGTGACTCGCTTTTTGTTTGATGAGATGCCCAAATCCAGGAAGAATGACTGA

>chimpanzee_H2A.P

ATGTCAGAGAAAAAGAACTGTAAGAACTCGTCTACAAATAACAACCAGACTCAAGATCCT

TCTAGAAATGAGCTACAGGTCCCTATGAGCTTCGTGGACCGCGTTGTGCAAGATGAACGA

GACGTCCAAAGCCAGAGTTCCTCCACAATAAATACCCTCCTTACCTTGCTCGATTGCCTT

GCTGACTACATCATGGAGCGGGTAGGCTTGGAGGCCAGCAACAATGGCAGTATGCGCAAC

ACTTCACAAGATAGGGAGAGAGAAGTGGACAACAACCGTGAGCCCCACAGCGCTGAGAGT

GATGTGACTCGCTTTTTGTTTGATGAGATGCCCAAATCCAGGAAGAATGACTGA

>orangutan_H2A.P

ATGTCAGAGAAAAAGAACTGTAAGAACTCCTCTACAAATAACAACCAGACTCAAGATCCT

TCTAGAAATGAGCTACAGGTCCCTATGAGCTTCGTGGACCGCGTTGTGCAAGACGAACGA

GACGCCCAAAGCCAGAGTTCCTCCACAATAAATACCCTCCTTACCTTGCTCGATTGCCTT

GCTGACTACATCATGGAGCGGGTAGGCTTGGAGGCCAGCAACAATGGCAGTATGCGCAAC

ACTTCACAAGATGGGGAGAGAGAAGTGGACAACAACCGTGAGCCCCACCACTCTGAGAGT

GATATGACTCGCTTTTTGTTTGATGAGATGCCCAAATCCAGGAAGAATGACTGA

>gorilla_H2A.P

ATGTCAGAGAAAAAGAACTGTAAGAACTCGTCTACAAATAACAACCAGACTCAAGACCCT

TCTAGAAATGAGCTACAGGTCCCTATGAGCTTCGTGGACCACGTTGTGCAAGATGAACGA

GACGCCCAAAGCCAGAGTTCCTCCACAATAAATACCCTCCTTACCTTGCTCGATTGCCTT

GCTGACTACATCATGGAGCAGGTAGGCTTGGAGGCCAGCAACAATGGCAGTATGCACAAC

ACTTCACAAGATGGGGAGAGAGAAGTGGACAACAACCGTGAGCCCCACAGCGCTGAGAGT

GATGTGACTCGCTTTTTGTTTGATGAGATGCCCAAATCCAGGAAGAGTGACTGA

>whiteCheekedGibbon_H2A.P

ATGTCAGAGAAAAAGAACTGTAAGAACTCCTCTACAAATAAC---CAGACTCAAGACCCT

TCTAGAAATGAGCTACAGGTCCCTATGAGCTTCGTGGACCGCGTTGTGCAAGATGAACGA

GACGCCCGAAGCCAGAGTTCCTCCACAATAAATACCCTCCTTACCTTGCTCGATTGTCTT

GCTGGCTACGTCATGGAGCGGGTAGGCTTGGAGGCCGACAACAATGGCAGCATGAGCAAC

ACTTCACAAGATGGGGAGAGAGAAGTGGACAATAACCGTGAGCCCCACCACGCTGAGAGT

GATGTGACTCGCTTTTTGTTTGATGAGATGCCCAAATCCAGAAAGGATGACTGA

>snubNosedMonkey_H2A.P

ATGTCAGAGAAAAATAACCGTAAGAACTCCTCTACAAATAACAACCAGATTCAAGACCCT

TCTAGAAATGGGCTGCGGGTCCCTATGAGCTTCGTGGACCGAGTTGTGCAAGATGAACAA

GACGCCCAAAGCCAGAGTTCCTCCACAATAAATATCCTCCTTACCCTGCTCGATTGCCTT

GCTGACTACATCATGCAGCAGGTAGGCTTGGAGGCCATCAACAATGGCAGGATGCGCAAC

ACTTCACAAGATGGGGAGAGAGAAGTGGACAACCACCAGGAGCCCGACCGCGCTGAGAGT

GATGGAACCCGCTTTGTGTTTGATGAGATGCCCAAATCCAAAAAGAATGACTGA

>squirrelMonkey_H2A.P

ATGTCAGAGACAAATAACTGTAAGAACTCTCCTACAAATAACAATCAGAATCAAGACCCT

TCTAGAAATGAGCTACAGGTCCCTAGGAGCTTTGTTGACCACCTTGTTCAGGATGAACGA

GATGCCCAAAGCCAAAGTTCCTCCATAATAAATAGCCTCCTTGCCTTGCTCGATTGCCTT

GGTGACTACATCATGGAGCAGGTAGGCCTGGAGGCCAGCCACAATGACAATATGAACAAC

ACTTCACAAGATGGGGAGAGAGAAGTGGACAACAACCGTGAGCCCCACTGCCTCGAGAGT

GATGTAACCTCCTTTCTGTTGGATGAGATGCCTAAATCTGAGAAGAATGGCTGA

>capuchin_H2A.P

ATGTCAGAGACAAAGAACTGTAAGAGTTCCCCTACAAATAACAATCAGAATCAAGACCCTTCTAGAAATGAGCTACAGGT

CCCTAGGAGCTTCGTTGACCGCCTTGTTCAGGATGAACGCGATGCCCAAAGCCAGAGTGCCTCTGTAATAAATAGCCTCC

TTACCTTGCTTGATTGCCTTGGTGACTACATCATGGAGCAGGTAGGCCTGGAGGCCAGCCACAATGACAGTATGAACAAC

ATTTCACAAGATGGGGAGAGAGAAGTGGACAACAACCGTGAGCCCCACCACCTCGAGAGTGATGTAATCTGCTTTCTGTT

GGATGAGATGCCCAAATCTAAGAAGAATGGCTGA

>oliveBaboon_H2A.P

ATGTCAGAGAAAAATAACCGTAAGAACTCCTCTACAAATAACAACCAGACTCAAGACCGG

TCTAGAAATGAGCTGCGGGTCCCTATGAGCTTCGTGGACCGAGTTGTGCAAGATGAACAA

GATGCCCAAAGCCAGAGTTCCTCCACAATAAATATCCTCCTTACCCTGCTCGATTGCCTT

GCTGACTACATCATGGAGCAGGTAGGCTTGGAGGTCATCAACAATGGCAGAATGCGCAAC

ACTTCACAAGATGGGGAGAGAGAAGTGGACAACCACCATGAGCCCCACCGCACTGAGAGT

GATGGAACCCGCTTTGTGTTTGATGAGATGCCCAAATCCGGAAAGAATGACTGA

>sootyMangabey_H2A.P

ATGTCAGAGAAAAATAACCGTAAGAACTCCTCTACAAATAACAACCAGACTCAAGACCGGTCTAGAAATGAGCTGCGGGT

CCCTATGAGCTTCGTGGACCGAGTTGTGCAAGATGAACAAGATGCCCAAAGCCAGAGTTCCTCCACAGTAAATATCCTCC

TTACCCTGCTCGATTGCCTTGCTGACTACATCATGGAGCAGGTAGGCTTGGAGGTCATCAACAATGGCAGGATGCGCAAC

ACTTCACAAGATGGGGAGAGAGAAGTGGACAACCACCATGAGCCCCACCGCACTGAGAGTGATGGAACCTGCTTTGTGTT

TGATGAGATGCCCAAATCCGGAAAGAAGGACTGA

>pigTailedMacaque_H2A.P

ATGTCAGAGAAAAATAACCGTAAGAACTCCTCTGCAAATAACAACCAGATTCAAGACCGG

TCTAGAAATGAGCTGCGGGTCCCTATGAGCTTCGTGGACCGAGTTGTGCAAGATGAACAA

GATGCCCAAAGCCAGAGTTCCTCCACAATAAATATCCTCCTTACCCTGCTCGATTGCCTT

GCTGACTACATCATGGAGCAGGTAGGCTTGGAGGCCATCAACAATGGCAGGATGCGCAAC

ACTTCACAAGATGGGGAGAGAGAAGTGGACAACCACCATGAGCCCCACCGCACTGAGAGT

GATGGAACCCGCTTTGTGTTTGATGAGATGCCCAAATCCGGAAAGAATGACTGA

>crabEatingMacaque_H2A.P

ATGTCAGAGAAAAATAACCGTAAGAACTCCTCTGCAAATAACAACCAGATTCAAGACCGG

TCTAGAAATGAGCTGCGGGTCCCTATGAGCTTCGTGGACCGAGTTGTGCAAGATGAACAA

GATGCCCAAAGCCAGAGTTCCTCCACAATAAATATCCTCCTTACCCTGCTCGATTGCCTT

GCTGACTACATCATGGAGCAGGTAGGCTTGGAGGCCATCAACAATGGCAGGATGCGCAAC

ACTTCACAAGATGGGGAGAGAGAAGTGGACAACCACCATGAGCCCCACCGCACTGAGAGT

GATGGAACCCGCTTTGTGTTTGATGAGATGCCCAAATCTGGAAAGAATGACTGA

>nightMonkey_H2A.P

ATGTCAGAGACAAACAACTGTAAGAACTCCCCTACAAATAACAATCAGAATCAAGACCCT

TCTAGAAATGAGCTACAGGTCCCTAGGAGCTTCGTTAACCGCGTTGTTCAGGATGAACGA

GATGCCCGAAGCCAGAGTTCCTCCATAATAAATAGCCTCCTTACCTTGCTTGATTGCCTT

GGTGACTACATCATGGAGCAGGTAGGCCTGGAGGCCAGCCACAATGACAGTATGAACAAC

ACTTCGCAAGATGGGGAGAGAGAAGTGGACAACAACCGTGAGCCCCACTGCCTCGAGAGT

GATGTAACCTGCTCTCTGTTGGATGAGATGGCCAAATCCGAGAAGAATGGCTGA

>saki_H2A.P

ATGTCAGAGACAATGAACTGTAAGAACTCCCCTACAAATAACAATCCGAATCAAGACCCT

TCTAGAAATGAGCTACAGGTCCCTAGGAGCTTTGTTGACTGCCTTGTGCAGGATGAACGA

GATGCCCAAAGCCAGAGTTCCTCCATAATAAGTAGCCTCCTTACCTTGCTCGATTGCCTT

GGCAACTACATCATGGAGCAGGTAGGCCTGGAGGCCAGCCACAATGACAGGATGAACAAC

ACTTCAAAAGATGGGGAGAGAGAAGCGGAAAACAACCGTGAGCCCCACCGCCTTGAGAGT

GATGTAACCTGCTTTCTGTCGGACGAGATGCCCAAATCTGAGAAGAATGGC---

>marmoset_H2A.P

ATGTCAGAAACAGAAAACTGTAAGAACTCCCCTACAAATAACAATCAGAATCAAGAACCT

TCAAGAAATGAGCCACAGGTCCCTAGGACCTTCGTTGACCGCCTTCTTCAGGATGAACGA

GATGCCCAAAGCCAGACTTCCTCCATGATAAATAGCCTCCTTACCTTGCTCGATTGCCTT

GGTGACTTCATCATGGAGCAGGTAGGCCTGGAGGCCAGCCACAATGACAGTATGAACAAC

ACTTCACAAGATGCGGAGAGAGAAGTGGACAACAACCGTGAGCCCCACTGCCTCGAGAGC

GATATAACCTGCTTTCTGTTGGATGGGATGCCCAAATCCGAGAAGAATGGCTGA

>woollyMonkey_H2A.P

ATGTCAGAGACAATGAACTGTAAGAACTCCCCTACAAATAACAATCAGAATCAAGACTCT

TCTAGAAATGAGCTACAGGTCCCTAGGAGCTTCATTGACCACCTTGTGCAGGATGAACGA

GATGCCCAAAGCTGGAGTTCCTCCATAATAAATAGCCTCCTTACCTTGCTCGATTGCCTT

GGTGACTACATCATGGAGCAGGTAGGCCTGGAGGCCAGCCACAATGACAGTATGAACAAC

ACTTCACAAGATGGGGAGAGAGAAGTGGACAACAACCATGAGCCCCACTGCCTTGAGAGT

GATGTAACCTGCTTTCTGTTGGATGAGATGCCCAAATCCGAGAAGAATGGC---

>mandrill_H2A.P

ATGTCAGAGAAAAATAACCGTAAGAACTCCTCTACAAATAACAACCAGACTCAAGACCGG

TCTAGAAATGAGCTGCGGGTCCCTATGAGCTTCGTGGACCGAGTTGTGCAAGATGAACAA

GATGCCCAAAGCCAGAGTTCCTCCACAATAAATATCCTCCTTACCCTGCTCGATTGCCTT

GCTGACTACATCATGGAGCAGGTAGGCTTGGAGGTCATCAACAATGGCAGAATGCGCAAC

ACTTCACAAGATGGGGAGAGAGAAGTGGACAACCACCATGAGCCCCACCGCACTGAGAGT

GATGGAACCCGCTTTGTGTTTGATGAGATGCCCAAATCCGGAAAGAAGGACTGA

>rhesusMacaque_H2A.P

ATGTCAGAGAAAAATAACCGTAAGAACTCCTCTGCAAATAACAACCAGATTCAAGACCGG

TCTAGAAATGAGCTGCGGGTCCCTATGAGCTTCGTGGACCGAGTTGTGCAAGATGAACAA

GATGCCCAAAGCCAGAGTTCCTCCACAATAAATATCCTCCTTACCCTGCTCGATTGCCTT

GCTGACTACATCATGGAGCAGGTAGGCTTGGAGGCCATCAACAATGGCAGGATGCGCAAC

ACTTCACAAGATGGGGAGAGAGAAGGGGACAACCACCATGAGCCCCACCGCACTGAGAGT

GATGGAACCCGCTTTGTGTTTGATGAGATGCCCAAATCCGGAAAGAATGACTGA

>greenMonkey_H2A.P

ATGTCAGAGAAAAATAACCGTAAGAACTCCTCTACAAATAACAACCAGATTCAAGACCGG

TCTAGAAATGAGCTGCGGGTCCCTATGAGGTTCGTGGACCGAGTTGTGCAAGATGAACAA

GATGCCGAAAGCCAGAGTTCCTCCACAATAAATATCATCCTTACCCTGCTCGATTGCCTT

GCTGACTACATCATGGAGCAGGTAGCCTTGGAGGCCATCAACAATGGCAGGATGCGCAAC

ACTTCACAAGATGGGGAGAGAGAAGTGGACAACCACCATGAGCCCCACCGCACTGAGAGT

GATGGAACCCGCTTTGTGTTTGATGAGATGCCCAAATCCGGAAAGAATGACTGA

>AngolanColobus_H2A.P

ATGTCAGAGAAAAATAACCATAAGAACTCCTCTACAAATAACAACCAGATTCAAGACCTT

TCTAGAAATGGGCAGCGGGTCCCTATGAGCTTCGTGGACGGAGTCGTGCAAGATGAACAA

GACGCCCAAAGCCAGAGTTCCTCCACAGTAAATATCCTCCTTACCCTGCTCGATTGCCTT

GCTGACTACGTCATGCAGCAGGTAGGCTTGGAGGCCATCAACAATGGCAGGATGCGCAAC

ACTTCACAAGATGGGGAGAGAGAAGTGGACAACCACCATGAGCCCGACCGCGCTGAGAGT

GATGGAACCCGCTTTGCGTTTGATGAGATGCCCAAATCCAAAAAGAATGACTGA

**Primate *H2A.Q* for PAML**

>nightMonkey_H2A.Q

ATGTTTTGGAAGAGAAGCCAAAGGAGCTCCTATAGGTGTAGAAATCAGACTTTCTCCTACTCCATGAGAGTCAAGCAGCAGTTCCCCTTAAGCTGTATGCACTGCCTTTTGTGGAAGAATCACTGCCCAAGACCTGAGCTTGTTCACCACTTTCAAATACTTGGTGGCAACATCCTGGAGCTGATGAGCAACAAGGTCCACAAAAACTATAGGATGCACATCACCCCAAAATATGTGGAAAGAGCAGTGGACAACAATCCATGGCTCAGCCACCTCTTTGAAGGTGACATAAATTCAGGTTGA

>drill_H2A.Q

ATGTTTTGGAAGAGAAGGCAAAGGAGGTCCTATAGGTGTAGAAATCAGACTTTCTCCTACTCCATAAAAGCCAAGCAGCAGTTCCCCTTGAGCTGTGTGCACTGCCTTTTGTGGAAGAATCACTGCCCAAGACCGGAGCTTGTTCACTACTTTCAAATACTTGGTGGCAACATCCTGGAGCTGATGGGCAACAAGGTCCACAAAAACTATAGGATGCACATCACCCCAAAATATGTGGAAAGAGCAGTGGACAACAATTCATTGATCAGCCACCTCTTTGAAGGTGACACAAA------TTGA

>sootyMangabey_H2A.Q

ATGTTTTGGAAGAGAAGGCAAAGGAGGTCCTATAGGTGTAGAAATCAGACTTTCTCCTACTCCATAAAAGCCAAGCAGCAGTTCCCCTTGAGCTGTGTGCACTGCCTTTTGTGGAAGAATCACTGCCCAAGACCGGAGCTTGTTCACTACTTTCAAATACTTGGTGGCAACATCCTGGAGCTGATGGGCAACAAGGTCCACAAAAACTATAGGATGCACATCACCCCAAAATATGTGGAAAGAGCAGTGGACAACAATTCATTGATCAGCCACCTCTTTGAAGGTGACACAAA------TTGA

>greenMonkey_H2A.Q

ATGTTTTGGAAGAGAAGGCAAAGGAGGTCCTATAGGTGTAGAAATCAGACTTTCTCCTACTCCATAAAAGCCAAACAGCAGTTTCCCTCGAGCTGTGTGCACTGCCTTTTGTGGAAGAATCACTGCCCAAGACCTGAGCTTGTTCACTACTTTCAAATACTTGGTGGCAACATCCTGGAGCTGATGGGCAACAAGGTCCACAAAACCTATAGGATGCACATCACCCCAAAATATGTAGAAAGAGCAGTGGACAACAATTCATTGATCAGCCACCTCTTTGAAGGTGACACAAA------TTGA

>proboscisMonkey_H2A.Q

ATGTTTTGGAAGAGAAGGCAAAGGAGGTCCTATAGGTGTAGAAATCAGACTTTCTCCTACTCCATAAAAGCCAAGCAGCAGTTCCCCTTGAGCTGTGTGCACTGCCTTTTGTGGAAGAATCACTGCCCAAGACCGGAGCTTGTTCACTACTTTCAAATACTTGGTGGCAACATCCTGGAGCTGATGGGCAACAAGGTCCACAAAAACTATAGGATGCACATCACCCCAAAATATGTGGAAAGAGCGGTGGACAACAATTCATTGATCAGCCACCTCTTTGAAGGTGACACAAATTCAGGTTGA

>baboon_H2A.Q

ATGTTTTGGAAGAGAAGGCAAAGGAGGTCCTATAGGTGTAGAAATCAGACTTTCTCCTACTCCATAAAAGCCAAGCAGCAGTTCCCCTTGAGCTGTGTGCACTGCCTTTTGTGGAAGAATCACTGCCCAAGACAGGAGCTTGTTCACTACTTTCAAATACTTGGTGGCAACATCCTGGAGCTGATGGGCAACAAGGTCCACAAAAACTATAGGATGCACATCACCCCAAAATATGTGGAAAGAGCAGTGGACAACAATTCATTGATCAGCCACCTCTTTGAAGGTGACACAAA------TTGA

>gibbon_H2A.Q

ATGTTTTGGAAGAGAAGGCAAAGGAGCTCCTATAGGTGTAGAAATCAGACTTTCTCCTACTCCATAAGAGCCAAGCAGCAGTTCCCCTTGAGCTGTGTGCACTGCCTTTTGTGGAAGAATCACTGCCCAAGACCTGAACTTGTTCACTACTTTCAAATACTTGGTGGCAACATCCTGGAGCTGATGGGCAACAAGGTCCACAAAAACTATAGGATGCACATCACCCCAAAATATGTGGAAAGAGTAGTGGACAACAATCTATTGCTCAGCCACCTCTTTGAAGGTGACACAAATTCAGGTTGA

>gorGor5_H2A.Q

ATGTTTTGGAAGAGAAGGCAAAGGAGCTCCTATAGGTGTAGAAATCAGACTTTCTCCTACTCCATAAGAGCCAAGCAGCAGTTCCTCTTGAGCTGTGTGCACTGCCTTTTGTGGAAGAATCACTGCCCAAGACCTGAACTTGTTCACTACTTTCAAATACTTGGTGGCAACATCCTGGAGCTGATGGGCAACAAAGTCCACAAAAACTATAGGATGCACATCACCCCAAAATATGTGGAAAGAGTAGTGGACAACAATCCATTGCTCAGCCACCTCTTTGAAGGTGACACAAATTCAGGCTGA

>orangutan_H2A.Q

ATGTTTTGGAAGAGAAGGCAAAGGAGCTCCTATAGGTGTAGAAATCAGACTTTCTCCTACTCCATAAGAGCCAAGCAGCAGTTCCCCTTGTGCTGTGTGCACTGCCTTTTGTGGAAGGATCACTGCCCAAGACCTGAACTTGTTCACTACTTTCAAATACTTGGTGGCAACATCCTGGAGCTGATGGGCAACAAGGTCCACAAAAACTATAGGATGCACATCACCCCAAAATACGTGGAAAGAGTAGTGGACAACAATCCATTGCTCAGCCACCTTCTT---------------------TGA

>bonobo_H2A.Q

ATGTTTTGGAAGAGAAGGCAAAGGAGCTCCTATAGGTGTAGAAATCAGACTTTCTCCTACTCCATAAGAGCCAAGCAGCAGTTCCTCTTGAGCTGTGTGCACTGCCTTTTGTGGAAGAATCACTGCCCAAGACCTGAACTTGTTCACTACTTTCAAATACTTGGTGGCAACATCCTGGAGCTGATGGGCAACAAGGTCCACAAAAACTATAGGATGCACATCACCCCAAAATATGTGGAAAGAGTAGTGGACAACAATCCATTGCTCAGCCACCTCTTTGAAGGTGACACAAATTCAGGCTGA

>chimp_H2A.Q

ATGTTTTGGAAGAGAAGGCAAAGGAGCTCCTATAGGTGTAGAAATCAGACTTTCTCCTACTCCATAAGAGCCAAGCAGCAGTTCCTCTTGAGCTGTGTGCACTGCCTTTTGTGGAAGAATCACTGCCCAAGACCTGAACTTGTTCACTACTTTCAAATACTTGGTGGCAACATCCTGGAGCTGATGGGCAACAAGGTCCACAAAAACTATAGGATGCACATCACCCCAAAATATGTGGAAAGAGTAGTGGACAACAATCCATTGCTCAGCCACCTCTTTGAAGGTGACAGAAATTCAGGCTGA

>human_H2A.Q

ATGTTTTCGAAGAGAAGGCAAAGGAGCTCCTATAGGTGTAGAAATCAGACTTTCTCCTACTCCATAAGAGCCAAGCAGCAGTTCCTCTTGAGCTGTGTGCACTGCCTTTTGTGGAAGAATCACTGCCCAAGACCTGAACTTGTTCACTACTTTCAAATACTTGGTGGCAACATCCTGGAGCTGATGGGCAACAAGGTCCACAAAAACTATAGGATGCACATCACCCCAAAATATGTGGAAAGAGTAGTGGACAACAATCCATTGCTCAGCCACCTCTTTGAAGGTGACACAAATTCAGGCTGA

**Non-Primate *H2A.Q* for PAML (test of neutrality)**

>cow_H2A.Q

ATGTCTGGAAATAGAAGCTATCACAGCTCCGATGGGCTTAAGAAGCGTACAGTCCCCTGC

ACCATGAAAACTAAGCTGCAGTTCTCCAAGAGCCATGTGGATCACCACCTCCAGGGAAAC

CAGGATGCCCATAACCAGAACTTGACCACCCAAATTTACCTCTCTGCCATTCTCAAAAAC

GTGTCTTCCAACGTTCTGAAGCTGGTGAGCGATGAGACCCAGAGCAACTGCAAGATTCAC

AGGGCAAAGCACAACCACCCACAGCTCCAACACGTCTTTGACAAGGACGCCAAATCTCAG

GTT---CATGAAATGTTCTGA

>sheep_H2A.Q

ATGTCTGGAAATAGAAGCTATCACAGCTCCGATGGGTTTAGGAAGCATATACTCCCCTGT

ACCATGAAAACCAAGCTACAGTTCTCCAAGAGCCATGTGGATCACCACCTCCAGGAAAAC

CAGGATGCCCAGAACCAGAACTTGACCAACCAGATTTACCTCTCTGCCATTCTCAAATAC

TTGTCTTCCAACGTTCTGAAGCTGGTGAGCAATGAGACCCAGAGCGACTGCAGGATTCAC

AAGGCAATGGACAACCACCCGCAGCTCCATCACGCCTTTGACAAGGACGCCAAATCTCAG

GTT---CATGAAATGTCCTGA

>goat_H2A.Q

ATGTCTGGAAATAGAAGCTATCACAGCTCCAATGGGTTTAGGAAGCATATACTCCCCTGT

ACCATGAAAACCAAGCTACAGTTCTCCAAGAGCCATGTGGATCACCACCTCCAGGAAAAC

CAGGATGCCCAGAACCAGAACTTGACCAACCAGATTTACCTCTCTGCCATTCTCAAATAC

TTGTCTTCCAACGCTCTGAAGCTGGTGAGCAATGAGACCCAGAGCGACTGCAGGATTCAC

AAGGCAATGGACAACCACCCACAGCTCCATCACGCCTTTGACAAGGACGCCAAATCTCAG

GTT---CATGAAATGTCCTGA

>pig_H2A.Q

ATGTCTGCAAATAGAAGCTGTCAGAACTCCTGCGGGCTTAGGAAGCACACACTCTCTCGC

TCCACGAAAACCAAGCTGCAGTTCCCTGAGAGCCAGGGGGGCCCCCTCTTGCAGGAAAAC

CACTCCGCCCAGCACCTGAACTTGTCCACGAGGGTTTTCCTCTCTGCCATTCTCAAGTAC

GTGACCGCCAACGTTCTAGAACTGGTGGGCAACGAGACCCCCAGCAACTGCAGGATCCAG

AGGACGGTCGGCAACAACCCGCAGCTCAGCCAACTGTTTGAAAATGAGACCGATCCTCAG

GTT---CGGGAAATGTTCTAA

>dog_H2A.Q

ATGTCTGGGAAAAGAAGTAGTCAGAACTCCTGCAGGCTTGGGAAGCAGACACTCTCCTCT

TCCACAAAAACCAAGTTGAAATTCTCTGTGAGCCATGAAGACCATCTCCTGCAGGAAAAC

CACCCTGCCCAGCACCTACGCTTTTCCAGCCAGGTTTGCCTCTCCGCCATTCTGAAATAT

GTGGCCACCAACATTCTGGAGCTGGTGGGCAATGAGGCCCACAATGACTGCAGGGTTCAA

AGGGCAGTGAACAACAACATGCAGAGCAGCCACCTCTTTGAGGATGACACCACTTCTCAG

GTC---TCTGAAATGTTCTGA

>ferret_H2A.Q

ATGTCTGGGAAAAGAAGCAGTCAGACCTCCTACAGGCTAGGGAAGCAGACATCGTCCTGC

TCCACAAAAACCAAGCTGCAGGTCCCCGTGAGCCATGTAGAGCCCATCCTGCAGGAGCAC

CAGCCTGTCCAGAACCTAAGCTTCTCCAGCCAGGTCTGCCTGTCGGCCATCCTGAAGTAC

GTGGCCACCAACATTCTGGAGCTGGTGGGCAATGAGGCCCAGCACAACTGCAGGGTCCAG

AGGGCCATGAACAACAACATGCAGAACAGCCACCTCTTTGAGGATGACACCACTTCTCAG

CTC---------------TGA

>polarBear_H2A.Q

ATGTCTGGGAAAAGAAGTGGTCCGAGCTCCTACAGGCTCGGGAAGCAGACATCCTCCTGC

TTCCCAAAATCCAAGCTGCAGTTCCCCGTGAGCCACGAAGAGCCCCTCCTGCAGGAAGAC

CACCCTGCCCAGCAGCTGAGCCTCTCCAGCCAGGTCTGCCTGTCGGCCATTCTGAAGTAC

GTGGCCACCAACATCCTGGAGCTGGTGGGCAACGAGGCCCAGCACAACTGCAGGGTGCAG

CGGGCCGTGAACAACAACATGCAGAGCGGCCACCTCTTCAAGGACGATGCCGCTTCTCAG

GTC---TCTGAAATGTTCTAA

>walrus_H2A.Q

ATGTCTGGGAAAAGAAGTGGTCGGAGCTCCTATAGGCTGGGGAAGCAGACATCCTCCTGC

TCCACAAAAACCAAGCTGCAGTTCTCCATGAGCCATGAAGAACCCCTCCTGCAGGAAAAC

CACCCTGCCCAGAAACTGAGCTTCTCCAGACAGGTCTGCCTGTCGGCCATCCTGAAGTAC

GTGGCCACCAACATTCTGGAGCTGGTGGGCAACAAGGCCCACCACAACTGCAGGGTGCAG

ACGGCCATGGACCACGACATGCAAATCAGCCACCTCTTTGAGGATGACACCACTTCTCAG

GTC---TCTGAAATGTTCTAA

>bat_pteropusAlecto_H2A.Q

ATGTCTGGAAAAAGAAGCTGTCTGAAC---TATAAGCTTAAGAAGCAGACTTTGTCGTGC

ACCACAAAAACCAAGCTGCATCTCCCTGTGAGCCACGAGGACAGCCTCCTGCAGGGAAAC

AACTCTGCCCGGAACCTGAGATTTTCCACTCAGGTTTTCCTCTCTGTCATTCTCAAATAT

GTGACCACCAACATCCTGGAGCTGGTAGACAACGAGGCCCACAACAACTGCTGCGTTCAG

AGGGCAGTGGACAAGAACCCACAGCTCGGCCAACACTTTAAGAATGGCAATAATTCTCAG

GTT---GATGAAATGTTCTAA

>horse_H2A.Q

ATGTCTGGAAAAAGAAGCTGTCAGAAC---TATAAGCTTATGAAGCAGACATTCTCCTGC

TCCGCAAAAACCAAGCTGCAGTTCCCTGTGAGCCATGTGGACTGCCTCCAGCAAGAAAAC

CACTCTGCCCAGCACCTGAGCTTGTCCACCCAGGTTTTCCTCCCTGCCATCCTCAAATAT

GTGACCAACAACATTCTGGAGTGGGTAGGCAACGAAGCCCACAACAGCTGCAGGATTCGG

AAGGCAGTAGCTAACAACCAGCAGCTTAGCCACCTCTTTGAGGATGACACTGATTCTCAA

GTT---AATGAAATGTTCTAA

>rhino_H2A.Q

ATGTCTGAGAAGAGAAGCTGTCAGAACTCCAGTAGGCTTAAGAAGCAGACATTCTCCTGC

TCCACAAAAGCCAAGCTGCACTTCCCTGTGAGCCATATGGACCGCCACCAGCAGGAAAAC

CACTCTGCCCAACAACTCAGCTTGTCCACCCCGGTTTTCCTCTCTGCCATTCGCAAATAC

GTGACCAACAACATTCTGGAGCTGGTGGGCAACGAATCCCACAACAACCGCAGGATCCGG

AGGGCAGTAGATAACGCCGAGCAGCTCAGCCACCTCTTTGAGGATGACAACCAATTCTCA

GGT---------------TGA

**Cetartiodactyla *H2A.Q* for PAML (test for positive selection)**

>Camel_H2A.Q

ATGTCTGGAAATAGAAGCTGTCAGAGCTCCTGTTGGCTAAGGAAGCAAACATTCTCCTGC

TCCACAAAAAACAAGCCACTGTTCCCTAAGAGCCATGCGGACCACCTCCTGCAGGAAAAC

CACTTTGCCCAGCAGCTGAACTTGCCCACCCAGGTTTTCCTCTCCGCCATTCTCAAATAT

GTCACCTCCAACGTTCTAGAGGTGGTGGGCAACAAGACCCACAGCAACTGCAGGATTCAG

AAGGCAGTGGACAACGACCTGCAGCTCAGCCACCTCTTTGAAGAGGACACCAATTCTCAG

GCTCGTGAAACATTCTAG

>Dromedary_H2A.Q

ATGTCTGGAAATAGAAGCTGTCAGAGCTCCTGTTGGCTAAGGAAGCAAACATTCTCCTGC

TCCACAAAAAACAAGCCACTGTTCCCTAAGAGCCATGCAGACCACCTCCTGCAGGAAAAC

CACTTTGCCCAGCAGCTGAACTTGCCCACCCAGGTTTTCCTCTCCGCCATTCTCAAATAT

GTCACCTCCAACGTTCTAGAGGTGGTGGGCAACAAGACCCACAGCAACTGCAGGATTCAG

AAGGCAGTGGACAACGACCTGCAGCTCAGCCACCTCTTTGAAGAGGACACCAATTCTCAG

GCTCGTGAAACATTCTAG

>Alpaca_H2A.Q

ATGTCTGGAAATAGAAGCTGTCAGAGCTCCTGTTGGCTAAGGAAGCAAACATTCTCCTGC

TCCACAAAAAACAAGCCACTGTTCCCTAAGAGCCATGCGGACCACCTCCTGCAGGAAAAC

CACTTTGCCCAGCAGCTGAACTTGTCCACCCAGGTTTTCCTCTCTGCCATTCTCAAATAT

GTCACCTCCAACGTTCTAGAGGTGGTGGGCAACAAGAGCCACAGCAACTGCAGGATTCAG

AAGGCAGCGGACAACGACCTGCAGCTCAGCCACCTCTTTGAAGAGGACACCAATTCTCAG

GCTCGTGAAACATTCTAG

>Pig_H2A.Q

ATGTCTGCAAATAGAAGCTGTCAGAACTCCTGCGGGCTTAGGAAGCACACACTCTCTCGC

TCCACGAAAACCAAGCTGCAGTTCCCTGAGAGCCAGGGGGGCCCCCTCTTGCAGGAAAAC

CACTCCGCCCAGCACCTGAACTTGTCCACGAGGGTTTTCCTCTCTGCCATTCTCAAGTAC

GTGACCGCCAACGTTCTAGAACTGGTGGGCAACGAGACCCCCAGCAACTGCAGGATCCAG

AGGACGGTCGGCAACAACCCGCAGCTCAGCCAACTGTTTGAAAATGAGACCGATCCTCAG

GTTCGGGAAATGTTC---

>Giraffe_H2A.Q

ATGTCTGGAAATAGAAGCTATCACAGCTCTGATGGGCTTAAGAAGCGTACACTCCCCTGC

ACCATGAAAACCAAGCTGCAGTTCTCCAAGAGCCATGTGGATCACCTCCTCCAGGAAAAC

CAGGCTGCCCAGAACCAGAACTTGACCACCCAGATTTTCCTCTCTGCCATTCTCAGGCAC

ATGTCTTCCAACATTCTGAAGCTGATGAGCAACGAGACCCAGAGCAACTGCAGGATTCAC

AGGGCAATGGACAACCCCACCCAGCTCCATCACGTCTTTGACAATGACGCCAAATCTCAG

GTTCATGAAATGTTCTGA

>Okapi_H2A.Q

ATGTCTGGAAATAGAAGCTATCACAGTTCTGATGGGCTTAAGAAGCATACACTCCCCTGC

ACCATGAAAACCAAGCTGCAGTTCTCCAAGAGCCATGTGGATCACCTCCTCCGGGAAAAC

CAGGCTGCCCAGAACCAGAACTTGACCACCCAGATTTTCCTCTCTGCCATTCTCAAGTAC

ACGTCTTCCAACATTCTGAAGCTGGTGAGCAACGAGACCCAGAGCAACTGCAGGATTCAC

AGGGCAATGGACAACCCCACCCAGCTCCATCATGTCTTTGACAATGGTGCCAAATCTCAG

GTTCATGAAATATTCTGA

>Cow_H2A.Q

ATGTCTGGAAATAGAAGCTATCACAGCTCCGATGGGCTTAAGAAGCGTACAGTCCCCTGC

ACCATGAAAACTAAGCTGCAGTTCTCCAAGAGCCATGTGGATCACCACCTCCAGGGAAAC

CAGGATGCCCATAACCAGAACTTGACCACCCAAATTTACCTCTCTGCCATTCTCAAAAAC

GTGTCTTCCAACGTTCTGAAGCTGGTGAGCGATGAGACCCAGAGCAACTGCAAGATTCAC

AGGGCAAAGCACAACCACCCACAGCTCCAACACGTCTTTGACAAGGACGCCAAATCTCAG

GTTCATGAAATGTTC---

>Yak_H2A.Q

ATGTCTGGAAATAGAAGCTATCACAGCTCCGATGGGCTTAGGAAGCGTACAGTCCCCTGC

ACCATGAAAACTAAGCTGCAGTTCTCCAAGAGCCATGTGGATCACCACCTCCAGGGAAAC

CAGGATGCCCATAACCAGAACTTGACCACCCAAATTTACCTCTCTGCCATTCTCAAAAAC

GTGTCTTCCAACGTTCTGAAGCTGGTGAGCGATGAGACCCAGAGCAACTGCAAGATTCAC

AGGGCGAAGCACAACCACCCACAGCTCCAACATGTCTTTGACAAGGACGCCAAATCTCAG

GTTCATGAAATGTTC---

>Bison_H2A.Q

ATGTCTGGAAATAGAAGCTATCACAGCTCCGATGGGCTTAGGAAGCGTACAGTCCCCTGC

ACCATGAAAACTAAGCTGCAGTTCTCCAAGAGCCATGTGGATCACCACCTCCAGGGAAAC

CAGGATGCCCATAACCAGAACTTGACCACCCAAATTTACCTCTCTGCCATTCTCAAAAAC

GTGTCTTCCAACGTTCTGAAGCTGGTGAGCGATGAGACCCAGAGCAACTGCAAGATTCAC

AGGGCAAAGCACAACCACCCACAGCTCCAACACGTCTTTGACAAGGACGCCAAATCTCAG

GTTCATGAAATGTTC---

>Antelope_H2A.Q

ATGTCTGGAAATAGAAGCTATCACAGCTCCGATGGGTTTAGGAAGCATATACTCCCCTGT

ACCATGAAAACCAAGCTACAGTTCTCCAAGAGCCATGTGGATCACCACCTCCAGGAAAAC

CAGGATGCCCAGAACCAGAACTTGACCAACCAGATTTACCTCTCTGCCATTCTCAAATAC

TTGTCTTCCAACGTTCTGAAGCTGGTGAGCAATGAGACCCAGAGCAACTGCAGGATTCAC

AAAGCAATGGACAACCACCCGCAGCTCCATCACGTCTTTGACAAGGACGCCAAATCTCAG

GTTCATGAAATG------

>Mouflon_H2A.Q

ATGTCTGGAAATAGAAGCTATCACAGCTCCGATGGGTTTAGGAAGCATATACTCCCCTGT

ACCATGAAAACCAAGCTACAGTTCTCCAAGAGCCATGTGGATCACCACCTCCAGGAAAAC

CAGGATGCCCAGAACCAGAACTTGACCAACCAGATTTACCTCTCTGCCATTCTCAAATAC

TTGTCTTCCAACGTTCTGAAGCTGGTGAGCAATGAGACCCAGAGCGACTGCAGGATTCAC

AAGGCAATGGACAACCACCCGCAGCTCCATCACGCCTTTGACAAGGACGCCAAATCTCAG

GTTCATGAAATG------

>Goat_H2A.Q

ATGTCTGGAAATAGAAGCTATCACAGCTCCAATGGGTTTAGGAAGCATATACTCCCCTGT

ACCATGAAAACCAAGCTACAGTTCTCCAAGAGCCATGTGGATCACCACCTCCAGGAAAAC

CAGGATGCCCAGAACCAGAACTTGACCAACCAGATTTACCTCTCTGCCATTCTCAAATAC

TTGTCTTCCAACGCTCTGAAGCTGGTGAGCAATGAGACCCAGAGCGACTGCAGGATTCAC

AAGGCAATGGACAACCACCCACAGCTCCATCACGCCTTTGACAAGGACGCCAAATCTCAG

GTTCATGAAATG------

>BarbarySheep_H2A.Q

ATGTCTGGAAATAGAAGCTATCACAGCTCCGATGGGTTTAGGAAGCATATACTCCCCTGT

ACCATGAAAACCAAGCTACAGTTCTCCAAGAGCCATGTGGATCACCACCTCCAGGAAAAC

CAGGATGCCCAGAACCAGAACTTGACCAACCAGATTTACCTCTCTGCCATTCTCAAATAC

TTGTCTTCCAACGCTCTGAAGCTGGTGAGCAATGAGACCCAGAGCGACTGCAGGATTCAC

AAGGCAATGGACAACCACCCGCAGCTCCATCACGCCTTTGACAAGGACGCCAAATCTCAG

GTTCATGAAATG------
