# Supplementary material for: Evolutionary origins and diversification of testis-specific short histone H2A variants in mammals
Source: HighWire-hosted journal article supplement (doi:10.1101/gr.229799.117), 2018-03-16
Supplement: Supplemental_Data_S4_.docx [file Supplemental_Data_S4_.docx]

**Supplemental Data S4: Alignments used for gene conversion analysis shown in Figure 4 and Supplemental Fig S7.**

**Primate Gene Conversion (Figure 4)**

>RhesusMacaque_H2A.B.2

ATGTCGGAGAGGAGGAGCCATCGCCGGTCCTCCAGGGCTGGTGGCCGGGGGCGGACCCGC

TCTCGCACCGTCCGAGCGGAGCTTTCGTTTTCGGTGAGCCAGGTGGAGCGCGGTCTACGG

GAGGGCCACTACGCTCAGCGCCTGAGTCCCACGGCGCCGGTCTACCTCGCTGCGGTTATC

GAGTACCTGACGGCCAAGGTCCTGGAGCTGGCGGGCAACGAGGCCCAGAACAACGGA---

GAGAGGAACATCACTCCACTGCTGCTGGACATGGCGGTTCACAACAACAGGCTGCTGAGC

ACCCTTTTTGACACAACCACCATCTCTCAAGTGGCCCCCGGCGGGGACTAG

>RhesusMacaque_H2A.B.Mac1

ATGTCGGAGAGGAGGAGCCATCGCCGGTCCTCCAGGGCTGGTGGCCGGGGGCGGACCCGC

TCTCGCACCGTCCGAGCGGAGCTTTCGTTTTCGGTGAGCCAGGTGGAGCGCGGTCTACGG

GAGGGCCACTACGCTCAGCGCCTGAGTCCCACGGCGCCGGTCTACCTCGCTGCGGTTATC

GAGTACCTGACGGCCAAGGTCCTGGAGCTGGCGGGCAACGAGGCCCAGAACAACGGA---

GAGAGGAACATCACTCCACTGCTGCTGGACATGGCGGTTCACAACAACAGGCTGCTGAGC

ACCCTTTTTGACACAACCCCCATCTCTCAAGTGGCCCCCGGCGGGGACTAG

>RhesusMacaque_H2A.B.Mac2

ATGTCGGAGAGGAGGAGCCATCGCCGGTCCTCCAGGGCTGGTGGCCGGGGGCGGACCCGC

TCTCGCACCGTCCGAGCGGAGCTTTCGTTTTCGGTGAGCCAGGTGGAGCGCGGTCTACGG

GAGGGCCACTACGCTCAGCGCCTGAGTCCCACGGCGCCGGTCTACCTCGCTGCGGTTATC

GAGTACCTGACGGCCAAGGTCCTGGAGCTGGCGGGCAACGAGGCCCAGAACAACGGA---

GAGAGGAACATCACTCCACTGCTGCTGGACATGGCGGTTCACAACAACAGGCTGCTGAGC

ACCCTTTTTGACACAACCACCATCTCTCAAGTGGCCCCCGGCGGG------

>Bonobo_H2A.B.2

ATGCCGAGGAGGAGGAGACACCGAGGGTCCTCCGGTGCTGGCGGCCGGGGGCGGACCTGC

TCTCGCACCGTCCGAGCGGAGCTTTCGTTTTCAGTGAGCCAGGTGGAGCGCAGTCTACGG

GAGGGCCAGTACGCTCAGCGCCTGAGTCGCACGGCGCCGGTCTACCTCGCTGCGGTTATT

GAGTACCTGACGGCCAAGGTCCTGGAGCTGGCGGGCAACGAGGCCCAGAACAGCGGA---

GCGCGGAACATCACTCCCCTGCTGCTGGACATGGTGGTTCACAACGACAGGCTACTGAGC

ACCCTTTTCAACACGACCACCATCTCTCAAGTGGCCCCCGGCGAGGACTAG

>Bonobo_H2A.B.bonobo1

ATGCCGAGGAGGAGGAGACACCGAGGGTCCTCCGGTGCTGGCGGCCGGGGGCGGACCTGC

TCTCGCACCGTCCGAGCGGAGCTTTCGTTTTCAGTGAGCCAGGTGGAGCGCAGTCTACGG

GAGGGCCAGTACGCTCAGCGCCTGAGTCGCACGGCGCCGGTCTACCTCGCTGCGGTTATT

GAGTACCTGACGGCCAAGGTCCTGGAGCTGGCGGGCAACGAGGCCCAGAACAGCGGA---

GCGCGGAACATCACTCCCCTGCTGCTGGACATGGTGGTTCACAACGACAGGCTACTGAGC

ACCCTTTTCAACACGACCACCATCTCTCAAGTGGCCCC-GGCGAGGACTAG

>Human_H2A.B.1.1

ATGCCGAGGAGGAGGAGACGCCGAGGGTCCTCCGGTGCTGGCGGCCGGGGGCGGACCTGC

TCTCGCACCGTCCGAGCGGAGCTTTCGTTTTCAGTGAGCCAGGTGGAGCGCAGTCTACGG

GAGGGCCACTACGCTCAGCGCCTGAGTCGCACGGCGCCGGTCTACCTCGCTGCGGTTATT

GAGTACCTGACGGCCAAGGTCCTGGAGCTGGCGGGCAACGAGGCCCAGAACAGCGGA---

GAGCGGAACATCACTCCCCTGCTGCTGGACATGGTGGTTCACAACGACAGGCTACTGAGC

ACCCTTTTCAACACGACCACCATCTCTCAAGTGGCCCCTGGCGAGGACTAG

>Human_H2A.B.2

ATGCCGAGGAGGAGGAGACGCCGAGGGTCCTCCGGTGCTGGCGGCCGGGGGCGGACCTGC

TCTCGCACCGTCCGAGCGGAGCTTTCGTTTTCAGTGAGCCAGGTGGAGCGCAGTCTACGG

GAGGGCCACTACGCTCAGCGCCTGAGTCGCACGGCGCCGGTCTACCTCGCTGCGGTTATT

GAGTACCTGACGGCCAAGGTCCCGGAGCTGGCGGGCAACGAGGCCCAGAACAGCGGA---

GAGCGGAACATCACTCCCCTGCTGCTGGACATGGTGGTTCACAACGACAGGCTACTGAGC

ACCCTTTTCAACACGACCACCATCTCTCAAGTGGCCCCTGGCGAGGACTAG

>Human_H2A.B.1.2

ATGCCGAGGAGGAGGAGACGCCGAGGGTCCTCCGGTGCTGGCGGCCGGGGGCGGACCTGC

TCTCGCACCGTCCGAGCGGAGCTTTCGTTTTCAGTGAGCCAGGTGGAGCGCAGTCTACGG

GAGGGCCACTACGCTCAGCGCCTGAGTCGCACGGCGCCGGTCTACCTCGCTGCGGTTATT

GAGTACCTGACGGCCAAGGTCCTGGAGCTGGCGGGCAACGAGGCCCAGAACAGCGGA---

GAGCGGAACATCACTCCCCTGCTGCTGGACATGGTGGTTCACAACGACAGGCTACTGAGC

ACCCTTTTCAACACGACCACCATCTCTCAAGTGGCCCCTGGCGAGGACTAG

>Gorilla_H2A.B.1.2

ATGCCGAGGAGGAGGAGACATCGAGGGTCCTCCGGTGCTGGCGGCCGGGGGCGGACCTGC

TCTCGCGCCGTCCGAGCGGAGCTTTCGTTTTCAGTGAGCCAGGTGGAGCGCAGTCTACGG

GAGGGCCACTACGCTCAGCGCCTGAGTCGCACGGCGCCGGTCTACCTCGCTGCGGTTATT

GAGTACCTGACGGCCAAGGTCCTGGAGCTGGCGGGCAACGAGGCCCAGAACAGCGGA---

GAGCGGAACATCACTCCCCTGCTGCTGGACATGGCGGTTCACAACGACAGGCTGCTGAGC

ACCCTTTTCAGCTCGACCACCATCTCTCAAGCGGCCCCTGGCGAGGACTAG

>Gorilla_H2A.B.1.1

ATGCCGAGGAGGAGGAGACATCGAGGGTCCTCCGGTGCTGGCGGCCGGGGGCGGACCTGC

TCTCGCGCCGTCCGAGCGGAGCTTTCGTTTTCAGTGAGCCAGGTGGAGCGCAGTCTACGG

GAGGGCCACTACGCTCAGCGCCTGAGTCGCACGGCGCCGGTCTACCTCGCTGCGGTTATT

GAGTACCTGACGGCCAAGGTCCTGGAGCTGGCGGGCAACGAGGCCCAGAACAGCGGA---

GAGCGGAACATCACTCCCCTGCTGCTGGACATGGCGGTTCACAACGACAGGCTGCTGAGC

ACCCTTTTCAGCTCGACCACCATCTCTCAAGCGGCCCCTGGCGAGGACTAG

>Gorilla_H2A.B.2

ATGCCGAGGAGGAGGAGACATCGAGGGTCCTCCGGTGCTGGCGGCCGGGGGCGGACCTGC

TCTCGCGCCGTCCGAGCGGAGCTTTCGTTTTCAGTGAGCCAGGTGGAGCGCAGTCTACGG

GAGGGCCACTACGCTCAGCGCCTGAGTCGCACGGCGCCGGTCTACCTCGCTGCGGTTATT

GAGTACCTGACGGCCAAGGTCCTGGAGCTGGCGGGCAACGAGGCCCAGAACAGCGGA---

GAGCGGAACATCACTCCCCTGCTGCTGGACATGGCGGTTCACAACGACAGGCTGCTGAGC

ACCCTTTTCAGCTCGACCACCATCTCTCAAGCGGCCCCTGGCGAGGACTAG

>Baboon_H2A.B.2

ATGTCGGGGAGGAGGAGCCATCGCCGGTCCTCCGGGGCTGGTGGCCGGGGGCAGACCCGC

TCTCGCACCGTCCGAGCGGAGCTTTCGTTTTCGGTGAGCCAGGTGGAGCGCGGTCTACGG

GAGGGCCACTACGCTCAGCGCCTGAGTCCCACGGCGCCGGTCTACCTCGCTGCGGTTATC

GAGTACCTGACGGCCAAGGTCCTGGAGCTGGCGGGCAACGAGGCCCAGGACAACGGA---

GAGAGGACCATCACTCCACTGCTGCTGGACAGGGCGGTTCACAACAACAGGCTGCTGAGC

ACCCTTTTTGACACAACCATCATCTCTCAAGTGGCCCCCGGCGGGGACTAG

>Baboon_H2A.B.1.2

ATGTCGGGGAGGAGGAGCCATCGCCGGTCCTCCGGGGCTGGTGGCCGGGGGCAGACCCGC

TCTCGCACCGTCCGAGCGGAGCTTTCGTTTTCGGTGAGCCAGGTGGAGCGCGGTCTACGG

GAGGGCCACTACGCTCAGCGCCTGAGTCCCACGGCGCCGGTCTACCTCGCTGCGGTTATC

GAGTACCTGACGGCCAAGGTCCTGGAGCTGGCGGGCAACGAGGCCCAGGACAACGGA---

GAGAGGACCATCACTCCACTGCTGCTGGACAGGGCGGTTCACAACAACAGGCTGCTGAGC

ACCCTTTTTGACACAACCATCATCTCTCAAGTGGCCCCCGGCGGGGACTAG

>Baboon_H2A.B.1.1

ATGTCGGGGAGGAGGAGCCATCGCCGGTCCTCCGGGGCTGGTGGCCGGGGGCAGACCCGC

TCTCGCACCGTCCGAGCGGAGCTTTCGTTTTCGGTGAGCCAGGTGGAGCGCGGTCTACGG

GAGGGCCACTACGCTCAGCGCCTGAGTCCCACGGCGCCGGTCTACCTCGCTGCGGTTATC

GAGTACCTGACGGCCAAGGTCCTGGAGCTGGCGGGCAACGAGGCCCAGGACAACGGA---

GAGAGGACCATCACTCCACTGCTGCTGGACAGGGCGGTTCACAACAACAGGCTGCTGAGC

ACCCTTTTTGACACAACCATCATCTCTCAAGTGGCCCCCGGCGGGGACTAG

>Marmoset_H2A.B.Mar4

ATGTCGGAGAGGAGAAGCCGTAGAGGGTCCTCTGCTGCTGGCCGCCGGGGGCATACCCGC

TCTCGCACTGCCCGAGCGGAACTGATATTTTCCGTTAGCAAGATGGAGCGCGGTCTATGG

GAAGGCCACTACGCCCAGCGCCTGAGCGACAATGCGCCAGTCTACCTTGCTGCTGTCATC

CAGTATCTGACGGCCAAGATCCTGGAGCTGGCGGCCAAGGAGGCCGACAACAGAGGA---

GAGAGGATCATCACTCCGCGGCTGCTGGACATGGCGGTTCATAACGACGGGCTGCTGAGC

ACCCTCTTCCACGCCATCACCATCTCTCAAGTGGGTCCCGGCCCGAACTAG

>Marmoset_H2A.B.Mar3

ATGTCGGAGAGGAGAAGCCGTAGAGGGTCCTCTGCTGCTGGCCGCCGGGGGCATACCCGC

TCTCGCACTGCCCGAGCGGAACTGATATTTTCCGTTAGCAAGATGGAGCGTGGTCTATGG

GAAGGCCACTACGCCCAGCGCCTGAGCGACAATGCGCCAGTCTACCTTGCTGCTGTCATC

CAGTATCTGACGGCCAAGATCCTGGAGCTGGCGGCCAAGGAGGCCGACAACAGAGGA---

GAGAGGATCATCACTCCGCGGCTGCTGGACATGGCGGTTCATAACGACGGGCTGCTGAGC

ACCCTCTTCCACGCCATCACCATCTCTCAAGTGGGTCCCGGCCCGAACTAG

>Marmoset_H2A.B.1

ATGTTGGGGAGGAGGAGCCGTCGAGGGTCCTCTGGTGCTGGCGGCCGGGGGCATACCCTC

TCTCGCACCGCCCGAGGGGAGCTTTTGTTTTCTGTGAGCGAGGTGGAGCGTAGTCTACAG

GAAGGCCAGTGCGCCCAGCGCCTGAGTCCCTCTGCGCCAGTCTTCCTCGCTGCCGTGATT

CAGTACCTGACGGCCCAGATCCTGGAGCTGGCGGGCAAGGAGGCCCACAACAACGGA---

GAGAGGACCATCACTCCACAGCCGCTGGACATGGCGGTTCACGACAACGCGCTGCTGAGC

ACCCTCTTTGACACAACAACCGTCTCTCAAGTGGTTCCCGGCCGGGACTAG

>Marmoset_H2A.B.Mar2

ATGTCGGAGAGGAGAAGCCGCAGAGGGTCCTCTGCTGCTGGCCGCCGGGGGCATACCCGC

TCTCGCACTGCCCGAGCGGAACTGATATTTTCCGTTAGCCAGATGGAGCGAGGTCTGTGG

GAAGGCCGCTACGCCCAGCGCCTGAGTTACAACGCGCCAATCTACCTTGCTGCTGTCATC

CAATATCTGACGGCCAAGATCCTGGAGCTGGCTGCTGAGGAGGCCGACAACAATGGAGGA

GAGAGGATCATCACTCCGCGGCTGCTGGACCTGGTGATTCGTAATGATGGGCTGCTGAAC

ACCCTCTTCCGAAACATACTCATCTCTCAAGTGGCTCCTGGCCCAAACTAG

>Marmoset_H2A.B.Mar1

ATGTCGGAGAGGAGAAGCCGCAGAGGGTCCTCTGCTGCTGGCCGCCGGGGGCATACCCGC

TCTCGCACTGCCCGAGCGGAACTGATATTTTCCGTTAGCCAGATGGAGCGAGGTCTGTGG

GAAGGCCACTACGCCCAGCGCCTGAGTGACAACGCGCCAATCTACCTTGCTGCTGTCATC

CAATATCTGACGGCCAAGATCCTGGAGCTGGCTGCCGAGGAGGCTGACAACAATGGAGGA

GAGAGGATCATCACTCCGCGGCTGCTGGACCTGGTGATTCGTAATGATGGGCTGCTGAGC

ACCCTCTTCCGAAACATACTCATCTCTCAAGTGGCTCCTGGCCCAAACTAG

>Pig_H2A.B.2

ATGCCCGGGAAAAGGAGCCGTCGAAAGTCACCC------GGTCGCCAGGGGCGGACCTGC

GCCCGCACCACCCGAGCCGGGCTGTCCGCCTCCGTGAGCCACATGGAGCGCCTCCTGCGG

GAGGGCCCCTACGCCCAGTGCCTGAGCTCGTCCGCCCGGGTCTTCCTCGCGGCCACCATC

GAGTACCTGACGGCCAGGGTCCTGGAGCTGGCGGGCGACGAGGCCCAGATTGTGGGT---

AGGAGGTGCATCACCCCAGAGCTGGTGGCCATGGCGGTCCACAACAACGCCCTGCTCAGC

GCCTTCTTCGGAACCCTCGCCATCTCGCAAGTGGCCCCGACCCAGGAGTAG

>Pig_H2A.B.1.1

ATGCCCGGGAAAAGGAGCCGTCGAAAGTCACCC------GGTCGCCAGGGGCGGACCTGC

GCCCGCACCACCCGAGCCGGGCTGTCCGCCTCCGTGAGCCACATGGAGCGCCTCCTGCGG

GAGGGCCCCTACGCCCAGTGCCTGAGCTCGTCCGCCCGGGTCTTCCTCGCGGCCACCATC

GAGTACCTGACGGCCAGGGTCCTGGAGCTGGCGGGCGACGAGGCCCAGATTGTGGGT---

AGGAGGTGCATCACCCCAGAGCTGGTGGCCATGGCGGTCCACAACAACGCCCTGCTCAGC

GCCTTCTTCGGAACCCTCGCCATCTCGCAAGTGGCCCCGACCCAGGAGTAG

**Carnivore Gene Conversion (Figure S7)**

>leopard_H2A.L.1

ATGTCTGGGAGGCACCGCCGCCGGCACCGTCGCAGACGGAGGAGGCACGCGGTGTCCCGC

---TCCAGGAGAGCCGAGCTGCAATTCCCGGTCAGCCGCGTGGAGCGTCTCCTG---CGA

GAGGGTCGCTACGCCCCGCGCCTGAGCGCGTCCACCCCGGTCTTCCTGACCGCCGTTCTC

GAGTACCTGACGGCCAACATCCTGGAGCTGGCGGGCAAGGAG---GCTCTGGACAGCCAC

AAGATGCGCATC---ACCCCGGAGCACGTGCAGCGAGCCCTGGGCAGCAACCAGCACCTC

AGGGGTCTCCTCGAGAACACCACCTCCCCTCGGGTG---GATGGGCTGCCCCGAGTTCGG

AAGTGGTGA------------------------------------

>leopard_H2A.L.2

ATGTCTGGGAGGCACCGCCGCCGGCACCGTCGCAGACGGAGGAGGCACGCGGTGTCCCGC

---TCCAGGAGAGCCGAGCTGCAATTCCCGGTCAGCCGCGTGGAGCGTCTCCTG---CGA

GAGGGTCGCTACGCCCCGCGCCTGAGCGCGTCCACCCCGGTCTTCCTGACCGCCGTTCTC

GAGTACCTGACGGCCAACATCCTGGAGCTGGCGGGCAAGGAG---GCTCTGGACAGCCAC

AAGATGCGCATC---ACCCCGGAGCACGTGCAGCGAGCCCTGGGCAGCAACCAGCACCTC

AGGGGTCTCCTCGAGAACACCACCTCCCCTCGGGTG---GATGGGCTGCCCCGAGTTCGG

AAGTGGTGA------------------------------------

>cheetah_H2A.L.a.partial

---------------CGCCGTCGGCACCGTCGCAGACGGAGGAGGCACGCGGAGTCCCGC

---TCCAGGAGAGCCGAGCTGCAATTCCCGGTCAGCCGCGTGGAGCGTCTCCTG---CGA

GAGTGTCGCTACGCCCCGCGCCTGAGCGCGTCCACCCCGGTCTTCCTGACCGCCGTTCTC

GAGTACCTGACGGCCAACATCCTGGAGCTGGCGGGCAAGGAG---GCTCTGGACAGCCAC

AAGATGCGCATC---ACCCCGGAGCACGTGCAGCGAGCCCTGGGCAGCAACCAGCACCTC

AAGGGTCTCCTCGAGAACACCACCTCCCCTCGGGTG---GATGGGATGCCCCGAGTTCGG

AAGTGGTGA------------------------------------

>ferret_H2A.L.1

ATGCCTGGGAGAAGAAGCCCCTGGCACTATCCTAGACATAGGAGGCACAGTCTGTCCCGC

---TCCATGAGAGCTGAGCTCCAATTCCCGGTTAGCCGCGTGGACCGCCTCCTG---AGA

CAGGGTCGCTATGCTCAGCGCCTGAGCTCATCTACACCGATCTTCCTCACGGGCGTTCTC

GAGTACCTGACGGCCAACATCCTCGAGCTGGCGGGCCAGGAG---GCTCGCAACAACAAC

AAGATACGCATC---ACCCCAGAGCACGTGCAGAGGGCCCTGAGCAGCCACCAGCACCTG

AGCCGCCTCTTTGAGGACAGCGCCTGCCCTCAGGTG---GAGGGGGTGCCCCAGCCCAGA

AAG---TGCGGCGGCCTGGGTCCCAGAGACAACAACCTCATCTAG

>ferret_H2A.L.3

ATGCCTGGGAGAAGAAGCCCCTGGCACTATCCTAGACATAGGAGGCACAGTCTGTCCCGC

---TCCATGAGAGCTGAGCTCCAATTCCCGGTTAGCCGCGTGGACCGCCTCCTG---AGA

CAGGGTCGCTATGCTCAGCGCCTGAGCTCATCTACACCGATCTTCCTCACGGGCGTTCTC

GAGTACCTGACGGCCAACATCCTCGAGCTGGCGGGCCAGGAG---GCTCGCAACAACAAC

AAGATACGCATC---ACCCCAGAGCACGTGCAGAGGGCCCTGAGCAGCCACCAGCACCTG

AGCCGCCTCTTTGAGGACAGCGCCTGCCCTCAGGTG---GAGGGGGTGCCCCAGCCCAGA

AAG---TGCGGCGGCCTGGGTCCCAGAGACAACAACCTCATCTAG

>dog_H2A.L.1

ATGTCTGGAGAAAGAGGCCCCGGGCATTCCCGTAGACCGAGGAGGCACGGCCTGTCCCGC

---TCTAGAAGAGCCGAACTGCAGTTCCCCGTCAGCCGCGTGGACCGCCTCCTG---CGC

GAGGGTCACTATGCCCACCGCTTAAGCTCGTCCACGCCTGTGTTCCTGGCCGGCATCCTA

GAGTACCTGACATCCAACATCCTGGAGCTCGCGGGCCAGGAG---GCCCGCAACAGCCAC

AAGATGCGCATC---ACCCCTGAGCACCTGCAGAAGGCCCTGGGCAACAACCAGTACCTG

AGCCAACTCTTTGAGGAGAACACCTACTCCCAGGGG---GATGGGATGGTCCAGGCCAGG

AAG---TGGTCAGGCCCGGGCACTGGGGCCGACAGCCGCATCTAG

>dog_H2A.L.3

ATGTCTGGAGAAAGAGGCCCCGGGCATTCCCGTAGACCGAGGAGGCACGGCCTGTCCCGC

---TCCAGAAGAGCCGAACTGCAGTTCCCCGTCAGCCGCGTGGACCGCCTCCTG---CGC

GAGGGTTGCTACGCCCACCGCTTAAGCTCATCCACACCTGTGTTCCTGACCGGCATCCTA

GAGTACCTGACATCCAACATCCTGGAGCTCGTGGGCCAGGAG---GCCTGCAACAGCCAC

AAGATGCGCATC---ACCCCCGAGCACATGCAGAAGGCCCTGGGCAACAACCAGTACCTG

AGCCAACTCTTTGAGGAGAACACCTACTCCCAGGGG---GATGGGATGGTCCAGGCCAGG

AAG---TGGTCAGGCCCGGGCACTGGGGCCGACAGCCGCATCTAG

>seal_H2A.L.2.pseud

------------------------------------------------TTGCTTTCCCTG

ATGCTATTAGGCAACAAGCTGCAGCTCCCCATTAGCCACAGGGACCTCCTACTGAA-AAA

AAAGGTCACTAAATTCAGCGCCTGAGCTCATGCATTCCTGTTTTCCTCGCCAGCATTCTC

AAGTACGGGATGGCCAACATCCTGGAGCTGGCAGGCCAGGAG---GCCCTCAACAGCCAC

AAGATGCGCATC---ACCCCAGAGCACGTGCAGAGGGCCCTGGGCAACAAGCAGCACCTG

AGCCACCTCTTTGAGGATAACACCTACTCTCAGGTG---GAAGCCGTGCCCCAACCCAAG

GAGTGGTGA------------------------------------

>dog_H2A.L.2.pseud

------------------------------------------------GTGCTTTCCCTG

---GTATTAGGCAACAAGCTGCAGTTCCCCATCAGCCGTGTGGACCGCCTCCTG---CGC

GAGGGTCATTATGCCCACTGCTTAAGCTTGTCCATGCCTGTGTTCCTGGCCAGCATCCTC

GAGTACCTGACGGCCAACATCCTGGAGCTGGCGGGCCAGGAG---GCCCATAACAGCCAC

AAGATGCGCATCA--CCCCCCCAGCACATGCAGAAAGCCCTGGGCAACAACCAACACCTG

AGCCAACTCTTTGAGGAGAACACCTACTGGGGGGGGGG-GTGGTGATGGGATGCCCCAGG

CCA---CGAAGTGGTCAGTCCCAGGGGGCTGACAGCCTCATCTAG

>ferret_H2A.L.2.pseud

------------------------------------------------GTGCTTTCCCTG

ATTCTATCAGGCAACAAGCTACAGCTCCCCATTAGCCACATGGACCTCCTACCGA--AAA

AAAGTTCACTAAATCCACTGCCTGAGCTCAGGCACACCTGTCTTCCTCACTGGCATTCTC

AAGTACCTGACAACCAACATCCTGGACCTGGTGGGCCAGGAG---GCCCCCAACAACCAC

AAGATGTGCATC---ACCCCAGAGCCTGTGCAGAGGGCCCTGGGCAACCACCAGCACCTG

AGCCGCCTCTTTGAG---------------------------------------------

---------------------------------------------

>walrus_H2A.L.2.pseud

------------------------------------------------TTGCTTTCCCTG

ATGCTATTAGGCAACAAGCTGCAGCTCCCCATTAGCCACAGGGACCTCCTACTGAA-AAA

AAAGGTCACTAAATTCAGCGCCTGAGCGCTGGC---------TGCCTCACAGGTATTCTC

GAGTACCTGATGGCCAACATCCTGGAGCTGGCAGGCCAGGAG---GCCCCGAACAACCAC

AAAATGCACAGC---ACCCCAGAACAAGTGCAGAGGGCCCTGGGCAACAACCAGCACCTG

AGCCGCCTCTTTGAGGATAACACCTACTCTCAGGTG---GAAGCCGTGCCCCAACCCAGG

GAGTGGTGA------------------------------------

>walrus_H2A.L.1

ATGTCTCGGAGAAGAAACCACTGGCGCTGTCATAGACGTAAGAGGCACGGTCTGTCCCGC

---TCCGTGAGGGCCGAGCTCCAGTTCCCGGTTAGCCGCGTGCACCGCCTCCTG---CGA

GAGGGTCACTATGCACAGCGCCTGAGCTCATCTACACCGGTCTTCCTCACTGGCGTTCTC

GAGTACCTGACGGCCAAAATCCTGGAGCTGGCGGGCCAGGAG---GCCCGCAACAGCCAC

AAGATGCGCATC---ACCCCAGAGCACGTGCAGAAGGCCCTGGGCAACAGCGAGCACCTG

AGCCGCCTCTTTGAGGATAACACCTACTCTCAGGTG---GAAGCCGTGCCCCAACCCAGG

GAGCGGTGA------------------------------------

>walrus_H2A.L.3

ATGTCTCGGAGAAGAAACCACTGGCGCTGTCATAGACGTAAGAGGCACGGTCTGTCCCGC

---TCCGTGAGGGCCGAGCTCCAGTTCCCGGTTAGCCGCGTGCACCGCCTCCTG---CGA

GAGGGTCACTATGCACAGCGCCTGAGCTCATCTACACCGGTCTTCCTCACTGGCGTTCTC

GAGTACCTGACGGCCAAAATCCTGGAGCTGGCGGGCCAGGAG---GCCCGCAACAGCCAC

AAGATGCGCATC---ACCCCAGAGCACGTGCAGAAGGCCCTGGGCAACAGCGAGCACCTG

AGCCGCCTCTTTGAGGATAACACCTACTCTCAGGTG---GAAGCCGTGCCCCAACCCAGG

GAGCGGTGA------------------------------------

>seal_H2A.L.1

ATGTCTCGGAGAAGAAACCACCGGCACTCTCACAGACGTAAGAGGCACAGTCTGTCCCGC

---TCCATGAGGGCCGAGCTCCATTTCCCGGTTAGCCGCGTGGACCGCCTCCTG---CGA

GAGGGTCGCTATGCCCAGCGCCTAAGCTCATCTACACCGGTCTTCCTCACCGGCATTCTC

GAGTACCTGACGGCCAACATCCTGGAGCTGGCAGGCCAGGAG---GCCCTCAAGAGCCAC

AAGATGCGCATC---ACCCCAGAGCACGTGCAGAGGGCCCTGGGCAACAACCAGTACCTG

AGCCGCCTCTTTGAGAATAACACCTACTCTCAGGTG---GAAGCCGTGCCCCAACCCAAG

GAGTGGTGA------------------------------------

>seal_H2A.L.3

ATGTCTCGGAGAAGAAACCACCGGCACTCTCACAGACGTAAGAGGCACAGTCTGTCCCGC

---TCCATGAGGGCCGAGCTCCATTTCCCGGTTAGCCGCGTGGACCGCCTCCTG---CGA

GAGGGTCGCTATGCCCAGCGCCTAAGCTCATCTACACCGGTCTTCCTCACCGGCATTCTC

GAGTACCTGACGGCCAACATCCTGGAGCTGGCAGGCCAGGAG---GCCCTCAAGAGCCAC

AAGATGCGCATC---ACCCCAGAGCACGTGCAGAGGGCCCTGGGCAACAACCAGTACCTG

AGCCGCCTCTTTGAGAATAACACCTACTCTCAGGTG---GAAGCCGTGCCCCAACCCAAG

GAGTGGTGA------------------------------------

>panda_H2A.L.3

ATGTCTGGAAGGAGAAGCCCCTGGCACTCTCACCAACATAAGAGGCACGGTCTGTCCCGC

---TCCATGAGAGCCAAGCTCCAGTTCCCGGTTAGCCGCGTGGACCGCCTCCTG---CGG

GAGGGTTGCTATGCCCAGCGCCTGAGCTCATCCACACCGGTCTTCCTCACTGGCGTTCTC

GAGTACCTGACGGCCAACATCCTGGAGCTGGCGGGCCAGGAG---GCCCGCAACCACCAC

AAGATGCGCATC---ACCCCGGAGCACGTGCAGAGGGCCCTGGTGAACAACCAGCACCTG

AGCTGCCTCTTTGAAGACATCACCTCCCCGCCGGCC---AAAGGGACGCCCCAGCTCAGG

AAGTGC---------------------------------------

>panda_H2A.L.1

ATGTCTGGAAGGAGAAGCCCCTGGCACTCTCACCAACATAAGAGGCACGGTCTGTCCCGC

---TCCATGAGAGCCGAGCTCCAGTTCCCGGTTAGCCGCGTGGACCGCCTCCTG---CGG

GAGGGTTGCTATGCCCAGCGCCTGAGCTCATCCACACCGGTCTTCCTCACTGGCGTTCTC

GAGTACCTGACGGCCAACATCCTGGAGCTGGCGGGCCAGGAG---GCCCGCAACCACCAC

AAGATGCGCATC---ACCCCGGAGCACGTGCAGAGGGCCCTGGTGAACAACCAGCACCTG

AGCTGCCTCTTTGAAGACATCACCTCCCTGCCGGCC---AAAGGGGCGCCCCGGCTCAGG

AAGTGC---------------------------------------

>panda_H2A.L.2.pseud

------------------------------------------------GCGCGTTCCCTG

ATGATATTAGGCAACGAGCTGCAGCTCTCCATTAGCCACACAGACC--TACTGT---AAA

AAAGGTCACTAAACCCAGCGCCTGAGCTCACGCACGCCTGTTTTCCTTGCAGGCATTCTC

------------------------------------CAGGCCAA-GGTAGCCACCACCAC

AAGATGCGCATC---ACTCCGGAGCACGTGCAGAGGGCCCTGGGCAACAACCAGCACCTG

AGCCACCTCTTTGAAGACATCACCTCCCCGCCGGCC---GAAGGGGCGCCCCAGCCCGGG

AAGTGC---------------------------------------

>rhino_H2A.L.3

ATGCCTGGGAAGAGAAGTCGCCAGCTCTCGCTTAGGCGTAAGAGGCAGGCCCAATCCCGC

---TCTACGAGAGCTGAGCTGCAGTTCCCCGTTAGCCGCGTGGACCACTTCCTG---CGA

CAGGGTCCCTATGGCCAGCGCCTGAGCTCGTCCACACCTGTTTTCCTCGCTGGTGTTCTC

GAATACCTGACGGCCAATATCCTGGAGCAGGCGAGCAAGGAG---GCCCACAGCAGCCGA

AAGATCCGCATC---ACCCCAGAACACGTGCAGAGGGCCGTAGACAACAACCTGAACCTC

AGCCACCTCTTTGAGAATGACACCTACCGTCAGGAT---GAGCAGATGCCACAACCCAGT

AGGAAGTGA------------------------------------
