# Supplementary material for: Evolutionary origins and diversification of testis-specific short histone H2A variants in mammals
Source: HighWire-hosted journal article supplement (doi:10.1101/gr.229799.117), 2018-03-16
Supplement: Supplemental_Tables_S1toS5_.xlsx [file Supplemental_Tables_S1toS5_.xlsx]

## Sheet: S1
Supplemental Table S1: Genomic coordinates of all short H2A variant genes identified in this study.
Species common name	Species binomial name	Source of sequence (assembly name, or other source)	Chromosome, contig, or Genbank accession	Start	End	Strand	H2A type	Gene name using synteny information. "(P)" denotes pseudogenes.	Note
African Green Monkey	Cercopithecus aethiops	Cercopithecus aethiops int22h-2 duplicon sequence	GenBank: AY781308.1	3767	4114	-	H2A.B	H2A.B.2
African Green Monkey	Cercopithecus aethiops	chlSab2	chrUn_KE147540v1	501697	502050	-	H2A.P	H2A.P
African Green Monkey	Cercopithecus aethiops	chlSab2	chrX	113609324	113609620	+	H2A.Q	H2A.Q
Alpaca	Vicugna pacos	RefSeq gene prediction	XM_015252163.1	1	318	+	H2A.Q
Angolan Colobus	Colobus angolensis	Cang.pa_1.0	KN979419.1	2731721	2732074	+	H2A.P	H2A.P
Antelope	Pantholops hodgsonii	GCF_000400835.1	NW_005815156.1	2464247	2464558	-	H2A.Q	H2A.Q
Armadillo	Dasypus novemcinctus	dasNov3	JH568955	670813	671205	-	canonical H2A	H2A
Armadillo	Dasypus novemcinctus	dasNov3	JH568190	455724	456062	+	H2A.B	H2A.B.1.2
Armadillo	Dasypus novemcinctus	dasNov3	JH573162	44275	44619	+	H2A.L	H2A.L.Armadillo1
Armadillo	Dasypus novemcinctus	dasNov3	JH575731	612126	612446	-	H2A.L	H2A.L.1(P)
Armadillo	Dasypus novemcinctus	dasNov3	JH570500	26464	26783	-	H2A.L	H2A.L.Armadillo2(P)
Armadillo	Dasypus novemcinctus	dasNov3	JH564780	114782	115138	-	H2A.P	H2A.P
Armadillo	Dasypus novemcinctus	dasNov3	JH582387	427879	428173	-	H2A.Q	H2A.Q(P)
Bank vole	Myodes glareolus	ASM130578v1	LIPI01017958.1	2003	2359	-	H2A.L	H2A.L.bankV2
Bank vole	Myodes glareolus	ASM130578v1	LIPI01003106.1	65871	66200	-	H2A.L	H2A.L.bankV3
Bank vole	Myodes glareolus	ASM130578v1	LIPI01366895.1	527	848	+	H2A.L	H2A.L.bankV1(P)
Bank vole	Myodes glareolus	ASM130578v1	LIPI01194796.1	257	570	+	H2A.L	H2A.L.bankV6(P)	interrupted by assembly gap
Bank vole	Myodes glareolus	ASM130578v1	LIPI01009700.1	306835	307136	-	H2A.L	H2A.L.bankV5(P)	interrupted by assembly gap
Bank vole	Myodes glareolus	ASM130578v1	LIPI01166080.1	12002	12293	-	H2A.L	H2A.L.bankV4(P)
Barbary sheep	Ammotragus lervia	A_lervia_NAZ_v1.0	NIVO01047802.1	4585	4896	-	H2A.Q
Bison	Bison bison bison	Bison_UMD1.0	NW_011478849.1	12942	13256	+	H2A.Q	H2A.Q
Black Flying Fox	Pteropus alecto	ASM32557v1	KB031147.1	3552491	3552805	-	H2A.Q	H2A.Q
Black-and-white Colobus	Colobus guereza	PCR product, this study	MF134877	NA	NA	+	H2A.B
Bonobo	Pan paniscus	panPan1	JH649721	8386	8739	+	H2A.B	H2A.B.bonobo1
Bonobo	Pan paniscus	panPan1	JH650279	437452	437799	-	H2A.B	H2A.B.2
Bonobo	Pan paniscus	panPan1	JH650433	4799175	4799618	-	H2A.L	H2A.L.3(P)
Bonobo	Pan paniscus	panPan1	JH650433	5090803	5091162	-	H2A.L	H2A.L.2(P)
Bonobo	Pan paniscus	panPan1	JH650433	4802811	4803164	-	H2A.P	H2A.P
Bonobo	Pan paniscus	panPan1	JH650359	2254168	2254470	-	H2A.Q	H2A.Q
Bushbaby	Otolemur garnettii	otoGar3	GL873677	603205	603555	+	H2A.P	H2A.P
Camel	Camelus bactrianus	RefSeq gene prediction	XM_010952547.1	1	318	+	H2A.Q
Capuchin	Cebus capucinus imitator	Cebus_imitator-1.0	KV389580.1	3307659	3308006	+	H2A.B	H2A.B.Capuchin1
Capuchin	Cebus capucinus imitator	Cebus_imitator-1.0	KV390194.1	235064	235696	+	H2A.L	H2A.L.capu2(P)
Capuchin	Cebus capucinus imitator	Cebus_imitator-1.0	KV390342.1	193990	194557	+	H2A.L	H2A.L.capu1(P)
Capuchin	Cebus capucinus imitator	Cebus_imitator-1.0	KV389710.1	2935158	2935595	-	H2A.L	H2A.L.3
Capuchin	Cebus capucinus imitator	Cebus_imitator-1.0	KV390214.1	293012	293377	-	H2A.L	H2A.L.2(P)
Capuchin	Cebus capucinus imitator	Cebus_imitator-1.0	KV390214.1	4921	5274	-	H2A.P	H2A.P
Cat	Felis catus	felCat8	chrX	126725995	126726336	+	H2A.B	H2A.B.1.1
Cat	Felis catus	felCat8	chrX	126738002	126738343	-	H2A.B	H2A.B.1.2
Cat	Felis catus	felCat8	chrUn_AANG03182762v1	60	401	-	H2A.B	H2A.B.cat1
Cat	Felis catus	felCat8	chrX	126326730	126326896	+	H2A.B	H2A.B.2	interrupted by assembly gap
Cat	Felis catus	felCat8	chrX	32026577	32026715	+	H2A.L	H2A.L.1(P)	interrupted by assembly gap
Cat	Felis catus	felCat8	chrX	32773603	32773941	+	H2A.P	H2A.P
Cheetah	Acinonyx jubatus	aciJub1	NW_015141336.1	1	339	+	H2A.L	H2A.L.Chee1	interrupted by assembly gap
Chimpanzee	Pan troglodytes	panTro5	chrX	154897444	154897791	+	H2A.B	H2A.B.1.1
Chimpanzee	Pan troglodytes	panTro5	chrX	154413245	154413592	+	H2A.B	H2A.B.2
Chimpanzee	Pan troglodytes	panTro5	chrUn_NW_015979360v1	4626	4973	-	H2A.B	H2A.B.Chimp1
Chimpanzee	Pan troglodytes	panTro5	chrX	154979582	154979912	-	H2A.B	H2A.B.1.2(P)
Chimpanzee	Pan troglodytes	panTro5	chrX	36998807	36999427	+	H2A.L	H2A.L.1(P)
Chimpanzee	Pan troglodytes	panTro5	chrX	38083985	38084428	+	H2A.L	H2A.L.3(P)
Chimpanzee	Pan troglodytes	panTro5	chrX	37772022	37772381	+	H2A.L	H2A.L.2(P)
Chimpanzee	Pan troglodytes	panTro5	chrX	38080441	38080794	+	H2A.P	H2A.P
Chimpanzee	Pan troglodytes	panTro5	chrX	138441866	138442168	+	H2A.Q	H2A.Q
Chinese Hamster	Cricetulus griseus	criGri1	KE382661	1348058	1348450	+	canonical H2A	H2A
Chinese Hamster	Cricetulus griseus	criGri1	KE377216	62412	62771	+	H2A.B	H2A.B.chineseH1
Chinese Hamster	Cricetulus griseus	criGri1	KE376757	1066352	1066705	-	H2A.L	H2A.L.2
Chinese Hamster	Cricetulus griseus	criGri1	KE376757	767259	767588	-	H2A.L	H2A.L.3
Chinese Hamster	Cricetulus griseus	criGri1	KE381409	10376	10696	+	H2A.L	H2A.L.chineseH1
Chinese Hamster	Cricetulus griseus	criGri1	KE376757	769503	769856	-	H2A.P	H2A.P
Coquerel's sifaka	Propithecus coquereli	Pcoq_1.0	NW_012141969.1	4053708	4054061	-	H2A.L	H2A.L.1
Coquerel's sifaka	Propithecus coquereli	Pcoq_1.0	NW_012141969.1	3237921	3238273	-	H2A.L	H2A.L.2(P)
Cow	Bos taurus	bosTau8	chrX	15232720	15233049	+	H2A.B	H2A.B_Cow1
Cow	Bos taurus	bosTau8	chrX	38476417	38476746	+	H2A.B	H2A.B.1.2(P)
Cow	Bos taurus	bosTau8	chrX	38968066	38968395	-	H2A.B	H2A.B.2(P)
Cow	Bos taurus	bosTau8	chrX	38556849	38557151	+	H2A.B	H2A.B.1.1(P)
Cow	Bos taurus	bosTau8	chrX	111752240	111752593	-	H2A.L	H2A.L.1
Cow	Bos taurus	bosTau8	chrX	110857583	110857936	-	H2A.L	H2A.L.3
Cow	Bos taurus	bosTau8	chrX	110867864	110868202	-	H2A.P	H2A.P(P)
Cow	Bos taurus	bosTau8	chrX	21929256	21929573	+	H2A.Q	H2A.Q
Crab-eating Macaque	Macaca fascicularis	macFas5	chrX	151761429	151761773	+	H2A.B	H2A.B.2
Crab-eating Macaque	Macaca fascicularis	macFas5	chrX	36191760	36192113	+	H2A.P	H2A.P
Deer mouse	Peromyscus maniculatus	Pman_1.0	NW_006501118.1	7201047	7201376	-	H2A.L	H2A.L.deerMouse2
Deer mouse	Peromyscus maniculatus	Pman_1.0	NW_006501118.1	6893206	6893535	-	H2A.L	H2A.L.deerMouse3
Deer mouse	Peromyscus maniculatus	Pman_1.0	NW_006501947.1	1215454	1215759	+	H2A.L	H2A.L.deerMouse1
Dog	Canis lupus familiaris	canFam3	chrX	123309169	123309804	-	H2A.B	H2A.B.1.2(P)
Dog	Canis lupus familiaris	canFam3	chrX	122912711	122913286	+	H2A.B	H2A.B.2(P)
Dog	Canis lupus familiaris	canFam3	chrX	31695347	31695733	+	H2A.L	H2A.L.1
Dog	Canis lupus familiaris	canFam3	chrX	32755403	32755789	+	H2A.L	H2A.L.3
Dog	Canis lupus familiaris	canFam3	chrX	32467474	32467815	-	H2A.L	H2A.L.2(P)
Dog	Canis lupus familiaris	canFam3	chrX	32745017	32745358	+	H2A.P	H2A.P
Dog	Canis lupus familiaris	canFam3	chrX	108617011	108617328	+	H2A.Q	H2A.Q
Drill	Mandrillus leucophaeus	Mleu1	KN978931.1	1766270	1766566	-	H2A.Q	H2A.Q
Drill	Mandrillus leucophaeus	RefSeq gene prediction	XM_011975414.1	NA	NA	+	H2A.P
Dromedary	Camelus dromedarius	RefSeq gene prediction	XM_010997073.1	1	318	+	H2A.Q
Elephant	Loxodonta africana	loxAfr3	scaffold_120	594299	594676	-	H2A.B	H2A.B.1.1
Elephant	Loxodonta africana	loxAfr3	scaffold_120	1136724	1137084	-	H2A.B	H2A.B.2(P)
Elephant	Loxodonta africana	loxAfr3	scaffold_134	552268	552630	-	H2A.L	H2A.L.2(P)
Elephant	Loxodonta africana	loxAfr3	scaffold_134	187903	188256	-	H2A.L	H2A.L.3
Elephant	Loxodonta africana	loxAfr3	scaffold_134	1525763	1526116	-	H2A.L	H2A.L.1
European woodmouse	Apodemus sylvaticus	ASM130590v1	LIPJ01557864.1	402	791	-	H2A.L	H2a.l.apod2
European woodmouse	Apodemus sylvaticus	ASM130590v1	LIPJ01111725.1	105771	106100	+	H2A.L	H2a.l.2
European woodmouse	Apodemus sylvaticus	ASM130590v1	LIPJ01275009.1	148300	148616	+	H2A.L	H2a.l.apod1(P)
Ferret	Mustela putorius furo	musFur1	GL896945	437606	437992	+	H2A.L	H2A.L.1
Ferret	Mustela putorius furo	musFur1	GL896945	1476604	1476990	+	H2A.L	H2A.L.3
Ferret	Mustela putorius furo	musFur1	GL896945	1209163	1209421	-	H2A.L	H2A.L.2(P)
Ferret	Mustela putorius furo	musFur1	GL897083	1861510	1861815	-	H2A.Q	H2A.Q
Field vole	Microtus agrestis	ASM130599v1	LIQJ01005704.1	157004	157384	-	H2A.L	H2A.L.fieldV3.a
Field vole	Microtus agrestis	ASM130599v1	LIQJ01228241.1	802	1122	+	H2A.L	H2A.L.fieldV2(P)
Field vole	Microtus agrestis	ASM130599v1	LIQJ01005921.1	76885	77187	+	H2A.L	H2A.L.fieldV1(P)
Giraffe	Giraffa camelopardalis tippelskirchi	LVKQ00000000.1	LVKQ01142055.1	141078	141395	-	H2A.Q
Goat	Capra hircus	capHir1	chrX	41002486	41002803	+	H2A.Q	H2A.Q
Golden hamster	Mesocricetus auratus	MesAur1.0	APMT01138415.1	129704	130036	-	H2A.L	H2A.L.goldenH2
Golden hamster	Mesocricetus auratus	MesAur1.0	APMT01138400.1	599	928		H2A.L	H2A.L.3
Golden hamster	Mesocricetus auratus	MesAur1.0	APMT01194247.1	8233	8553	+	H2A.L	H2A.L.goldenH1
Golden snub-nosed monkey	Rhinopithecus roxellana	rhiRox1	KN294671v1	280081	280419	-	H2A.B	H2A.B.2
Golden snub-nosed monkey	Rhinopithecus roxellana	rhiRox1	KN300096v1	12923	13276	-	H2A.P	H2A.P
Gorilla	Gorilla gorilla gorilla	gorGor5	CYUI01015804v1	441188	441535	-	H2A.B	H2A.B.2
Gorilla	Gorilla gorilla gorilla	gorGor5	CYUI01000471v1	82737	83084	-	H2A.B	H2A.B.1.1
Gorilla	Gorilla gorilla gorilla	gorGor5	CYUI01000471v1	14183	14530	+	H2A.B	H2A.B.1.2
Gorilla	Gorilla gorilla gorilla	gorGor5	CYUI01014941v1	8108399	8108941	+	H2A.L	H2A.L.1(P)
Gorilla	Gorilla gorilla gorilla	gorGor5	CYUI01014941v1	9188625	9189068	+	H2A.L	H2A.L.3(P)
Gorilla	Gorilla gorilla gorilla	gorGor5	CYUI01014941v1	8887211	8887572	+	H2A.L	H2A.L.2(P)
Gorilla	Gorilla gorilla gorilla	gorGor5	CYUI01014941v1	9185126	9185479	+	H2A.P	H2A.P
Gorilla	Gorilla gorilla gorilla	gorGor5	CYUI01015156v1	2675934	2676236	+	H2A.Q	H2A.Q
Guinea Pig	Cavia porcellus	cavPor3	scaffold_148	459659	460027	-	H2A.B	H2A.B.1.1(P)
Guinea Pig	Cavia porcellus	cavPor3	scaffold_148	1009668	1010036	-	H2A.B	H2A.B.2(P)
Guinea Pig	Cavia porcellus	cavPor3	scaffold_33	21882071	21882424	-	H2A.L	H2A.L.1-1
Guinea Pig	Cavia porcellus	cavPor3	scaffold_33	20996606	20996956	-	H2A.L	H2A.L.GuineaP1
Guinea Pig	Cavia porcellus	cavPor3	scaffold_33	21884069	21884419	-	H2A.L	H2A.L.1-2(P)
Guinea Pig	Cavia porcellus	cavPor3	scaffold_33	21106062	21106408	+	H2A.L	H2A.L.GuineaP2(P)
Guinea Pig	Cavia porcellus	cavPor3	scaffold_33	20390256	20390600	-	H2A.L	H2A.L.3-2(P)
Guinea Pig	Cavia porcellus	cavPor3	scaffold_33	20411017	20411357	-	H2A.L	H2A.L.3-1(P)
Guinea Pig	Cavia porcellus	cavPor3	scaffold_33	20403192	20403555	-	H2A.P	H2A.P.GuineaP1(P)
Guinea Pig	Cavia porcellus	cavPor3	scaffold_33	20407021	20407374	-	H2A.P	H2A.P
Guinea Pig	Cavia porcellus	cavPor3	scaffold_33	20411942	20412201	-	H2A.P	H2A.P.GuineaP2(P)
Guinea Pig	Cavia porcellus	cavPor3	scaffold_79	3622318	3622632	-	H2A.Q	H2A.Q(P)
Horse	Equus caballus	equCab2	chrX	123779499	123779848	-	H2A.B	H2A.B.1.1(P)
Horse	Equus caballus	equCab2	chrX	30573190	30573543	+	H2A.L	H2A.L.3
Horse	Equus caballus	equCab2	chrX	110244558	110244872	+	H2A.Q	H2A.Q
Howler Monkey	Alouatta sara	PCR product, this study	MF134878	NA	NA	+	H2A.B
Human	Homo sapiens	hg19	chrX	154610436	154610783	+	H2A.B	H2A.B.1.1
Human	Homo sapiens	hg19	chrX	154689241	154689588	-	H2A.B	H2A.B.1.2
Human	Homo sapiens	hg19	chrX	154113325	154113672	+	H2A.B	H2A.B.2
Human	Homo sapiens	hg19	chrX	36737991	36738590	+	H2A.L	H2A.L.1(longORF)
Human	Homo sapiens	hg19	chrX	37853597	37854043	+	H2A.L	H2A.L.3(longORF)
Human	Homo sapiens	hg19	chrX	37559216	37559578	+	H2A.L	H2A.L.2(P)
Human	Homo sapiens	hg19	chrX	37850093	37850446	+	H2A.P	H2A.P
Human	Homo sapiens	hg19	chrX	137641157	137641459	+	H2A.Q	H2A.Q
Leopard	Panthera pardus	PanPar1.0	NW_017619947.1	5930086	5930478	+	canonical H2A	H2A
Leopard	Panthera pardus	PanPar1.0	NW_017620118.1	9499	9840	+	H2A.B	H2A.B.2
Leopard	Panthera pardus	PanPar1.0	NW_017620046.1	1275355	1275708	+	H2A.L	H2A.L.1
Leopard	Panthera pardus	PanPar1.0	NW_017619914.1	11411	11764	+	H2A.L	H2A.L.2
Leopard	Panthera pardus	PanPar1.0	NW_017619914.1	346253	346591	+	H2A.P	H2A.P
Marmoset	Callithrix jacchus	calJac3	chrX	83726738	83727088	-	H2A.B	H2A.B.Mar1
Marmoset	Callithrix jacchus	calJac3	chrX	83691776	83692126	-	H2A.B	H2A.B.Mar2
Marmoset	Callithrix jacchus	calJac3	chrX_ACFV01190291_random	2176	2523	+	H2A.B	H2A.B.Mar3
Marmoset	Callithrix jacchus	calJac3	chrX_ACFV01190613_random	3334	3681	-	H2A.B	H2A.B.Mar4
Marmoset	Callithrix jacchus	calJac3	chrX_ACFV01180405_random	8292	8639	+	H2A.B	H2A.B.1.1
Marmoset	Callithrix jacchus	calJac3	chrX	36392977	36393461	+	H2A.L	H2A.L.2(P)
Marmoset	Callithrix jacchus	calJac3	chrX	36703965	36704405	+	H2A.L	H2A.L.3.1
Marmoset	Callithrix jacchus	calJac3	chrX	35683730	35684170	+	H2A.L	H2A.L.1
Marmoset	Callithrix jacchus	calJac3	chrX	36736960	36737400	+	H2A.L	H2A.L.3.2
Marmoset	Callithrix jacchus	calJac3	chrUn_GL286479	36316	36749	+	H2A.L	H2A.L.Mar1(P)
Marmoset	Callithrix jacchus	calJac3	chrX	36714773	36715123	+	H2A.P	H2A.P
Mouflon	Ovis aries musimon	Oori1	NW_011943201.1	466864	467175	-	H2A.Q
Mouse	Mus musculus	mm10	chr13	21786826	21787218	-	canonical H2A	H2a
Mouse	Mus musculus	mm10	chrX	117014757	117015104	+	H2A.B	H2a.b.mouse2
Mouse	Mus musculus	mm10	chrX	120312748	120313095	-	H2A.B	H2a.b.mouse3
Mouse	Mus musculus	mm10	chrX	116681178	116681525	+	H2A.B	H2a.b.RatMouse1
Mouse	Mus musculus	mm10	chrX	116198189	116198535	+	H2A.B	H2a.b.mouse(P)
Mouse	Mus musculus	mm10	chrX	9849751	9850137	+	H2A.L	H2a.l.3
Mouse	Mus musculus	mm10	chrX	66025549	66025890	+	H2A.L	H2a.l.mouse1(P)
Mouse	Mus musculus	mm10	chr2	17996538	17996873	-	H2A.L	H2a.l.Chr2
Mouse	Mus musculus	mm10	chrY	2599099	2599434	+	H2A.L	H2a.l.Y.1
Mouse	Mus musculus	mm10	chrY	2720339	2720674	-	H2A.L	H2a.l.Y.2
Mouse	Mus musculus	mm10	chrX	9572016	9572348	-	H2A.L	H2a.l.mouse3
Mouse	Mus musculus	mm10	chrX	79008689	79009019	-	H2A.L	H2a.l.1(P)
Mouse	Mus musculus	mm10	chrX	11327822	11328151	+	H2A.L	H2a.l.mouse_telo10
Mouse	Mus musculus	mm10	chrX	14211209	14211538	+	H2A.L	H2a.l.mouse2
Mouse	Mus musculus	mm10	chrX	11299321	11299638	+	H2A.L	H2a.l.mouse_telo1
Mouse	Mus musculus	mm10	chrX	11302489	11302806	+	H2A.L	H2a.l.mouse_telo2
Mouse	Mus musculus	mm10	chrX	11305655	11305972	+	H2A.L	H2a.l.mouse_telo3
Mouse	Mus musculus	mm10	chrX	11308824	11309141	+	H2A.L	H2a.l.mouse_telo4
Mouse	Mus musculus	mm10	chrX	11311991	11312308	+	H2A.L	H2a.l.mouse_telo5
Mouse	Mus musculus	mm10	chrX	11318325	11318642	+	H2A.L	H2a.l.mouse_telo7
Mouse	Mus musculus	mm10	chrX	11315158	11315475	+	H2A.L	H2a.l.mouse_telo6
Mouse	Mus musculus	mm10	chrX	11321492	11321809	+	H2A.L	H2a.l.mouse_telo8
Mouse	Mus musculus	mm10	chrX	11324659	11324976	+	H2A.L	H2a.l.mouse_telo9
Mouse	Mus musculus	mm10	chrX	9350696	9351013	+	H2A.L	H2a.l.mouse1
Mouse	Mus musculus	mm10	chrX	9283859	9284176	+	H2A.L	H2a.l.2
Mouse	Mus musculus	mm10	chrX	9847031	9847384	+	H2A.P	H2a.p
Mouse	Mus musculus	mm10	chrX	59012618	59012929	+	H2A.Q	H2a.q(P)
Mouse Lemur	Microcebus murinus	micMur2	KQ057363v1	203496	203837	-	H2A.B	H2A.B.2
Mouse Lemur	Microcebus murinus	micMur2	KQ056456v1	2108200	2108550		H2A.P	H2A.P
Mouse Lemur	Microcebus murinus	micMur2	KQ055152v1	1710993	1711336	+	H2A.Q	H2A.Q(P)
Mus caroli	Mus caroli	Sanger-REL-504	chrX	3822214	3822555	+	H2A.L	H2a.l.3
Mus caroli	Mus caroli	Sanger-REL-504	chrX	61171031	61171370	+	H2A.L	H2a.l.MCar2(P)
Mus caroli	Mus caroli	Sanger-REL-504	chrX	74554368	74554704	-	H2A.L	H2a.l.1(P)
Mus caroli	Mus caroli	Sanger-REL-504	chrX	5180597	5180932	+	H2A.L	H2a.l.MCar3(P)
Mus caroli	Mus caroli	Sanger-REL-504	chr2	14471684	14472019	-	H2A.L	H2a.l.Chr2
Mus caroli	Mus caroli	Sanger-REL-504	chrX	8006033	8006366	+	H2A.L	H2a.l.MCar4(P)
Mus caroli	Mus caroli	Sanger-REL-504	chrX	5177412	5177741	+	H2A.L	H2a.l.MCar1.c
Mus pahari	Mus pahari	Sanger-REL-504	chrX	3168453	3168833	+	H2A.L	H2a.l.3
Mus pahari	Mus pahari	Sanger-REL-504	chrX	67288784	67289109	-	H2A.L	H2a.l.1(P)
Mus spretus	Mus spretus	Sanger-REL-504	chrX	4598598	4598984	-	H2A.L	H2a.l.3
Mus spretus	Mus spretus	Sanger-REL-504	chrX	61443017	61443374	-	H2A.L	H2a.l.1(P)
Mus spretus	Mus spretus	Sanger-REL-504	chrX	4147404	4147739	+	H2A.L	H2a.l.MSp2
Mus spretus	Mus spretus	Sanger-REL-504	chrX	48643621	48643956	+	H2A.L	H2a.l.MSp3
Mus spretus	Mus spretus	Sanger-REL-504	chrX	4350108	4350443	-	H2A.L	H2a.l.MSp4
Mus spretus	Mus spretus	Sanger-REL-504	chrX	6170532	6170867	-	H2A.L	H2a.l.MSp6(P)
Mus spretus	Mus spretus	Sanger-REL-504	chr2	15585239	15585574	-	H2A.L	H2a.l.Chr2
Mus spretus	Mus spretus	Sanger-REL-504	chrX	4300318	4300635	+	H2A.L	H2a.l.MSp1
Mus spretus	Mus spretus	Sanger-REL-504	chrX	48616517	48616797	+	H2A.L	H2a.l.MSp5(P)
Mus spretus	Mus spretus	Sanger-REL-504	chrX	9094444	9094679	+	H2A.L	H2a.l.MSp7-gap	interrupted by assembly gap
Night Monkey	Aotus nancymaae	Anan1.0	KN993565.1	395702	396049	+	H2A.B	H2A.B.2
Night Monkey	Aotus nancymaae	Anan1.0	KN993310.1	2594204	2594683	-	H2A.L	H2A.L.nightMonk1
Night Monkey	Aotus nancymaae	Anan1.0	KN988173.1	114133	114505	+	H2A.L	H2A.L.2(P)
Night Monkey	Aotus nancymaae	Anan1.0	KN988173.1	393635	393988	+	H2A.P	H2A.P
Night Monkey	Aotus nancymaae	Anan1.0	GL192750.1	177251	177593	+	H2A.Q	H2A.Q
Okapi	Okapia johnstoni	LVCL000000000.1	LVCL010154557.1	32566	32883	-	H2A.Q
Olive Baboon	Papio anubis	papAnu2	JH681881	6979	7326	+	H2A.B	H2A.B.1.1
Olive Baboon	Papio anubis	papAnu2	JH681881	48886	49233	-	H2A.B	H2A.B.1.2
Olive Baboon	Papio anubis	papAnu2	chrX	142195121	142195468	+	H2A.B	H2A.B.2
Olive Baboon	Papio anubis	papAnu2	chrX	34116484	34116920	+	H2A.L	H2A.L.1(longORF)
Olive Baboon	Papio anubis	papAnu2	chrX	34919430	34919860	+	H2A.L	H2A.L.2(P)
Olive Baboon	Papio anubis	papAnu2	chrX	35216937	35217274	+	H2A.L	H2A.L.3(P)
Olive Baboon	Papio anubis	papAnu2	chrX	35213493	35213846	+	H2A.P	H2A.P
Olive Baboon	Papio anubis	papAnu2	chrX	126723406	126723702	+	H2A.Q	H2A.Q
Opossum	Monodelphis domestica	monDom5	chr6	275094009	275094440	-	H2A.R	H2A.R.1
Opossum	Monodelphis domestica	monDom5	chr6	275076223	275076654	+	H2A.R	H2A.R.2
Orangutan	Pongo pygmaeus abelii	BAC clone CH276-222A20	AC206010.4	174256	174603	+	H2A.B	H2A.B.1.1
Orangutan	Pongo pygmaeus abelii	ponAbe2	chrX	38501643	38501996	+	H2A.P	H2A.P
Orangutan	Pongo pygmaeus abelii	ponAbe2	chrX	138152697	138152978	+	H2A.Q	H2A.Q
Panda	Ailuropoda melanoleuca	ailMel1	GL194552.1	164194	164586	+	canonical H2A	H2A
Panda	Ailuropoda melanoleuca	ailMel1	GL194975.1	96530	96868	+	H2A.B	H2A.B.1.1
Panda	Ailuropoda melanoleuca	ailMel1	GL194550.1	1765	2103	+	H2A.B	H2A.B.1.1_Panda1
Panda	Ailuropoda melanoleuca	ailMel1	GL194550.1	11163	11501	-	H2A.B	H2A.B.1.2
Panda	Ailuropoda melanoleuca	ailMel1	GL193563.1	427690	428040	+	H2A.L	H2A.L.1
Panda	Ailuropoda melanoleuca	ailMel1	GL192360.1	3855301	3855651	-	H2A.L	H2A.L.3
Panda	Ailuropoda melanoleuca	ailMel1	GL192360.1	4121199	4121468	+	H2A.L	H2A.L.2(P)
Panda	Ailuropoda melanoleuca	ailMel1	GL192360.1	3863559	3863897	-	H2A.P	H2A.P
Panda	Ailuropoda melanoleuca	ailMel1	GL192750.1	177251	177593	+	H2A.Q	H2A.Q(P)
Pig	Sus scrofa	susScr3	chr7	22094934	22095326	+	canonical H2A	H2A
Pig	Sus scrofa	susScr3	chrX	142863278	142863619	-	H2A.B	H2A.B.1.1
Pig	Sus scrofa	susScr3	chrX	143203156	143203497	-	H2A.B	H2A.B.2
Pig	Sus scrofa	susScr3	chrX	142893841	142894052	-	H2A.B	H2A.B.1.2	interrupted by assembly gap
Pig	Sus scrofa	susScr3	chrX	36949090	36949458	-	H2A.L	H2A.L.pig1
Pig	Sus scrofa	susScr3	chrX	36255339	36255707	+	H2A.L	H2A.L.1
Pig	Sus scrofa	susScr3	chrX	37660084	37660452	+	H2A.L	H2A.L.3
Pig	Sus scrofa	susScr3	chrX	37221743	37222110	+	H2A.L	H2A.L.2(P)
Pig	Sus scrofa	susScr3	chrX	37654928	37655269	+	H2A.P	H2A.P
Pig	Sus scrofa	susScr3	chrX	129501061	129501378	+	H2A.Q	H2A.Q
Pig-tailed Macaque	Macaca nemestrina	RefSeq gene prediction	XM_011710250.1	NA	NA	+	H2A.P
Platypus	Ornithorhynchus anatinus	ornAna1	Contig111576	140	580	+	H2A.R	H2A.R
Polar Bear	Ursus maritimus	UrsMar_1.0	NW_007907195.1	2067941	2068258	+	H2A.Q	H2A.Q
Prairie vole	Microtus ochrogaster	MicOch1.0a	AHZW01027119.1	42432	42785	+	H2A.L	H2A.L.prairieVole2
Prairie vole	Microtus ochrogaster	MicOch1.0a	AHZW01001879.1	19702	20055	+	H2A.L	H2A.L.prairieVole3
Prairie vole	Microtus ochrogaster	MicOch1.0a	AHZW01161920.1	14718	15070	+	H2A.L	H2A.L.prairieVole1(P)
Prairie vole	Microtus ochrogaster	MicOch1.0a	AHZW01027133.1	2327	2656	+	H2A.L	H2A.L.3
Proboscis Monkey	Nasalis larvatus	nasLar1	chrX	129977370	129977672	+	H2A.Q	H2A.Q
Rabbit	Oryctolagus cuniculus	oryCun2	chrUn0085	472916	473263	-	H2A.B	H2A.B.1.1
Rabbit	Oryctolagus cuniculus	oryCun2	chrX	23588575	23588931	+	H2A.L	H2A.L.3
Rabbit	Oryctolagus cuniculus	oryCun2	chrX	21867547	21867903	-	H2A.L	H2A.L-Rabbit1
Rabbit	Oryctolagus cuniculus	oryCun2	chrX	22658040	22658396	+	H2A.L	H2A.L-Rabbit2
Rabbit	Oryctolagus cuniculus	oryCun2	chrX	22721582	22721938	+	H2A.L	H2A.L.1
Rabbit	Oryctolagus cuniculus	oryCun2	chrX	23270844	23271197	+	H2A.L	H2A.L.2(P)
Rabbit	Oryctolagus cuniculus	oryCun2	chrUn0002	1728271	1728581	+	H2A.Q	H2A.Q(P)
Rat	Rattus norvegicus	rn6	chr10	45297608	45298000	+	canonical H2A	H2a
Rat	Rattus norvegicus	rn6	chrX	88602135	88602485	+	H2A.B	H2a.b.ratMouse1
Rat	Rattus norvegicus	rn6	chr1	147019270	147019607	+	H2A.B	H2a.b.rat1(P)
Rat	Rattus norvegicus	rn6	chr1	147026071	147026408	-	H2A.B	H2a.b.rat2(P)
Rat	Rattus norvegicus	rn6	chrX	13992064	13992442	+	H2A.L	H2a.l.3
Rat	Rattus norvegicus	rn6	chrX	46224163	46224494	-	H2A.L	H2a.l.1(P)
Rat	Rattus norvegicus	rn6	chrX	14507454	14507780	+	H2A.L	H2a.l.2
Rat	Rattus norvegicus	rn6	chrX	13989485	13989838	+	H2A.P	H2a.p
Rat	Rattus norvegicus	rn6	chrX	141979799	141980115	+	H2A.Q	H2a.q(P)
Rhesus Macaque	Macaca mulatta	rheMac8	chrUn_NW_014979541v1	2548	2895	+	H2A.B	H2A.B.Mac1
Rhesus Macaque	Macaca mulatta	rheMac8	chrX	148227869	148228216	+	H2A.B	H2A.B.2
Rhesus Macaque	Macaca mulatta	rheMac8	chrUn_NW_014827808v1	1	342	-	H2A.B	H2A.B.Mac2
Rhesus Macaque	Macaca mulatta	rheMac8	chrX	37749630	37750226	+	H2A.L	H2A.L.3(P)
Rhesus Macaque	Macaca mulatta	rheMac8	chrX	36658114	36658629	+	H2A.L	H2A.L.1(longORF)
Rhesus Macaque	Macaca mulatta	rheMac8	chrX	37451210	37451575	+	H2A.L	H2A.L.2(P)
Rhesus Macaque	Macaca mulatta	rheMac8	chrX	37746088	37746441	+	H2A.P	H2A.P
Sclater's Lemur	Eulemur flavifrons	Eflavifronsk33QCA	LGHW01001942.1	22930	23307	+	H2A.Q	H2A.Q(P)
Sheep	Ovis aries	oviAri3	chrX	98270563	98270892	-	H2A.B	H2A.B.SheepCow(P)
Sheep	Ovis aries	oviAri3	chrX	75426068	75426397	+	H2A.B	H2A.B.2(P)
Sheep	Ovis aries	oviAri3	chrX	75847499	75847828	-	H2A.B	H2A.B.Sheep1(P)
Sheep	Ovis aries	oviAri3	chrX	75912163	75912492	+	H2A.B	H2A.B.1.1(P)
Sheep	Ovis aries	oviAri3	chrX	35300419	35300769	+	H2A.L	H2A.L.3
Sheep	Ovis aries	oviAri3	chrX	34225007	34225339	+	H2A.L	H2A.L.1
Sheep	Ovis aries	oviAri3	chrX	35292654	35292996	+	H2A.P	H2A.P(P)
Sheep	Ovis aries	oviAri3	chrX	91702797	91703114	-	H2A.Q	H2A.Q
Siamang	Hylobates syndactylus	PCR product, this study	MF134876	NA	NA	+	H2A.B
Sooty Mangabey	Cercocebus atys	Caty_1.0	KQ012605.1	247667	248020	-	H2A.P	H2A.P
Sooty Mangabey	Cercocebus atys	Caty_1.0	KQ010259.1	3374438	3374734	+	H2A.Q	H2A.Q
Spider Monkey	Ateles geoffroyi	PCR product, this study	MF134880	NA	NA	+	H2A.B
Squirrel	Ictidomys tridecemlineatus	speTri2	JH393312	3921351	3921701	+	H2A.L	H2A.L.1
Squirrel	Ictidomys tridecemlineatus	speTri2	JH393312	4842837	4843187	+	H2A.L	H2A.L.3
Squirrel Monkey	Saimiri boliviensis	saiBol1	JH378299	1511723	1512070	+	H2A.B	H2A.B.2
Squirrel Monkey	Saimiri boliviensis	saiBol1	AGCE01149547	1043	1501	-	H2A.L	H2A.L.sqMonk1
Squirrel Monkey	Saimiri boliviensis	saiBol1	JH378161	2139768	2140226	+	H2A.L	H2A.L.sqMonk2
Squirrel Monkey	Saimiri boliviensis	saiBol1	JH378114	23545036	23545401	-	H2A.L	H2A.L.2(P)
Squirrel Monkey	Saimiri boliviensis	saiBol1	JH378114	23256474	23256902	-	H2A.L	H2A.L.3
Squirrel Monkey	Saimiri boliviensis	saiBol1	JH378114	23269150	23269503	-	H2A.P	H2A.P
Talapoin	Miopithecus talapoin	PCR product, this study	MF134875	NA	NA	+	H2A.B
Tasmanian Devil	Sarcophilus harrisii	sarHar1	chr2_GL841615_random	201374	201828	+	H2A.R	H2A.R.2
Tasmanian Devil	Sarcophilus harrisii	sarHar1	chr2_GL841615_random	224555	225000	-	H2A.R	H2A.R.1
Walrus	Odobenus rosmarus divergens	Oros_1.0	KB229109	1604427	1604780	+	H2A.L	H2A.L.1
Walrus	Odobenus rosmarus divergens	Oros_1.0	KB229181	1942677	1942978	-	H2A.L	H2A.L.2(P)
Walrus	Odobenus rosmarus divergens	Oros_1.0	KB228977	256906	257259	+	H2A.L	H2A.L.3
Walrus	Odobenus rosmarus divergens	Oros_1.0	KB229150	1784685	1785002	-	H2A.Q	H2A.Q
Weddell Seal	Leptonychotes weddellii	lepWed1	KB715597	8501	8854	+	H2A.L	H2A.L.1
Weddell Seal	Leptonychotes weddellii	lepWed1	KB719093	99248	99558	-	H2A.L	H2A.L.2(P)
Weddell Seal	Leptonychotes weddellii	lepWed1	KB716594	263812	264165	+	H2A.L	H2A.L.3
White Rhinoceros	Ceratotherium simum	cerSim1	JH767762	312120	312512	-	canonical H2A	H2A
White Rhinoceros	Ceratotherium simum	cerSim1	JH767892	384236	384619	-	H2A.B	H2A.B.1.1
White Rhinoceros	Ceratotherium simum	cerSim1	JH767773	11114370	11114723	-	H2A.L	H2A.L.3
White Rhinoceros	Ceratotherium simum	cerSim1	JH767802	924524	924748	-	H2A.L	H2A.L.Rhino1(P)
White Rhinoceros	Ceratotherium simum	cerSim1	JH767773	11124465	11124800	-	H2A.P	H2A.P
White Rhinoceros	Ceratotherium simum	cerSim1	JH767773	13627097	13627432	+	H2A.P	H2A.P.Rhino1
White Rhinoceros	Ceratotherium simum	cerSim1	JH767831	2450538	2450843	+	H2A.Q	H2A.Q
White-cheeked Gibbon	Nomascus leucogenys	nomLeu3	chrX_GL397702_1_random	28701	29045	-	H2A.B	H2A.B.1.1
White-cheeked Gibbon	Nomascus leucogenys	nomLeu3	chrX	54297628	54297852	-	H2A.L	H2A.L.2(P)
White-cheeked Gibbon	Nomascus leucogenys	nomLeu3	chrX	53988703	53989139	+	H2A.L	H2A.L.3(longORF)
White-cheeked Gibbon	Nomascus leucogenys	nomLeu3	chrX	53994456	53994806	-	H2A.P	H2A.P
White-cheeked Gibbon	Nomascus leucogenys	nomLeu3	chrX	125059109	125059411	+	H2A.Q	H2A.Q
White-faced Saki	Pithecia pithecia	PCR product, this study	MF134879	NA	NA	+	H2A.B
White-faced Saki	Pithecia pithecia	PCR product, this study	MF134882	NA	NA	+	H2A.P
Woolly Monkey	Lagothrix lagotricha	PCR product, this study	MF134881	NA	NA	+	H2A.B
Woolly Monkey	Lagothrix lagotricha	PCR product, this study	MF134883	NA	NA	+	H2A.P
Yak	Bos mutus	BosGru_v2.0	NW_005393815.1	1400546	1400860	-	H2A.Q

## Sheet: S2
Supplemental Table S2, sheet A: Detailed table of results from all analyses of positive selection
Alignment	Apecies group	Tree file	Num. seqs	Seq. length (nt)	Seq. length (codons)	Codeml selection model	Starting omega	Codon model	lnL	Num. parameters	Test	2diffML	Degrees of freedom	p-value	% sites under positive selection	dN/dS of sites under positive selection	Positively selected sites (BEB>0.9)
Primate H2A.B	Simian primates	Gene Tree	21	345	115	7	0.4	2	-1708.15	42
Primate H2A.B	Simian primates	Gene Tree	21	345	115	8	0.4	2	-1706.31	44	M7vsM8	3.68187	2	0.158669
Primate H2A.B	Simian primates	Gene Tree	21	345	115	8a	0.4	2	-1707.48	43	M8vsM8a	2.34669	1	0.12555
Primate H2A.P	Simian primates	Gene Tree	21	354	118	7	0.4	2	-1427.7	42
Primate H2A.P	Simian primates	Gene Tree	21	354	118	8	0.4	2	-1419.19	44	M7vsM8	17.0212	2	0.000201324	0.26	2.9	5K, 34R, 97S, 98A, 114R
Primate H2A.P	Simian primates	Gene Tree	21	354	118	8a	0.4	2	-1427.59	43	M8vsM8a	16.8111	1	4.12909e-05
Primate H2A.Q	Simian primates	Gene Tree	12	306	102	7	1	3	-588.822	24
Primate H2A.Q	Simian primates	Gene Tree	12	306	102	8	1	3	-588.763	26	M7vsM8	0.117826	2	0.942789
Primate H2A.Q	Simian primates	Gene Tree	12	306	102	8a	1	3	-588.819	25	M8vsM8a	0.113014	1	0.736738
Cetartiodactyla H2A.Q	Cetartiodactyla	Gene tree	13	318	106	7	1	3	-1102.16	26
Cetartiodactyla H2A.Q	Cetartiodactyla	Gene tree	13	318	106	8	1	3	-1102.09	28	M7vsM8	0.138784	2	0.932961
Cetartiodactyla H2A.Q	Cetartiodactyla	Gene tree	13	318	106	8a	1	3	-1102.12	27	M8vsM8a	0.052726	1	0.818386
Supplemental Table S2, sheet B: Detailed table of results from all analyses of neutrality
Alignment	Species group	Region used	Variant	dN/dS (M0)	p-value to reject neutrality (M0 vs M0 fixing dN/dS at 1)	Total tree length	dN tree length	dS tree length	Kappa
8speciesLogos	Mammals	full-length	cenH3	0.3	<10-21	2.84	0.57	1.9	2.36
8speciesLogos	Mammals	full-length	H2A.B	0.25	<10-26	3.81	0.78	3.18	2.44
8speciesLogos	Mammals	full-length	H2A.L	0.32	<10-24	5.88	1.31	4.14	2.45
8speciesLogos	Mammals	full-length	H2A.P	0.58	<10-4	4.61	1.29	2.22	3.11
8speciesLogos	Mammals	full-length	H2A	0	<10-132	1.82	0.01	4.23	3.54
8speciesLogos	Mammals	HFD-only	cenH3	0.2	<10-21	2.36	0.36	1.86	2.03
8speciesLogos	Mammals	HFD-only	H2A.B	0.17	<10-26	3.52	0.65	3.72	2.22
8speciesLogos	Mammals	HFD-only	H2A.L	0.23	<10-26	4.99	0.94	4.14	2.65
8speciesLogos	Mammals	HFD-only	H2A.P	0.63	0.002	4.87	1.4	2.23	2.97
8speciesLogos	Mammals	HFD-only	H2A	0	<10-81	2.04	0.02	4.8	4.31
12 species (Fig. 5B)	Primates	full-length	H2A.Q	0.66	0.27	0.37	0.11	0.16	3.99
12 species (Fig. 5B)	Primates	HFD-only	H2A.Q	0.71	0.41	0.39	0.12	0.16	7.37
11 species (Fig. 5B)	Non-primate mammals	full-length	H2A.Q	0.54	<10-4	3.54	1	1.85	3.15
11 species (Fig. 5B)	Non-primate mammals	HFD-only	H2A.Q	0.4	<10-7	3.54	0.92	2.33	3.06

## Sheet: S3
Supplemental Table S3: List of SRA datasets used for RNA-seq analysis.
SRA run ID	Tissue	Species	Data source
SRR2564757	heart	Pig	Yang et al, 2017, Sci Rep
ERR1815479	liver	Pig	Wageningen University FAANG project
SRR2564765	ovary	Pig	Yang et al, 2017, Sci Rep
ERR1815471	testis_Duroc	Pig	Wageningen University FAANG project
SRR2088056	oocyte_inVivo1	Pig	University of Missouri, unpublished
SRR388743	heart_rep1	Dog	Broad Institute, unpublished
SRR388744	heart_rep2	Dog	Broad Institute, unpublished
SRR388761	heart_rep3	Dog	Broad Institute, unpublished
SRR388736	liver_rep1	Dog	Broad Institute, unpublished
SRR388741	liver_rep2	Dog	Broad Institute, unpublished
SRR388752	liver_rep3	Dog	Broad Institute, unpublished
SRR388742	ovary_rep1	Dog	Broad Institute, unpublished
SRR388756	ovary_rep2	Dog	Broad Institute, unpublished
SRR388764	ovary_rep3	Dog	Broad Institute, unpublished
SRR388746	testis_rep1	Dog	Broad Institute, unpublished
SRR388755	testis_rep2	Dog	Broad Institute, unpublished
SRR388758	testis_rep3	Dog	Broad Institute, unpublished
SRR306848	Heart_Male1	Human	Brawand et al, 2011, Nature
SRR306849	Heart_Male2	Human	Brawand et al, 2011, Nature
SRR306852	Kidney_Male1	Human	Brawand et al, 2011, Nature
SRR306853	Kidney_Male2	Human	Brawand et al, 2011, Nature
SRR306854	Liver1	Human	Brawand et al, 2011, Nature
SRR306855	Liver2	Human	Brawand et al, 2011, Nature
SRR306857	Testis1	Human	Brawand et al, 2011, Nature
SRR306858	Testis2	Human	Brawand et al, 2011, Nature
SRR893046	oocyte_1	Human	Xue et al., 2013, Nature
SRR893047	oocyte_2	Human	Xue et al., 2013, Nature
ERR579132	ovary_adult	Human	Science for Life Laboratory, Royal Institute of Technology, Stockholm, unpublished
SRR306731	Heart_Male	Platypus	Brawand et al, 2011, Nature
SRR306737	Liver_Male1	Platypus	Brawand et al, 2011, Nature
SRR306738	Liver_Male2	Platypus	Brawand et al, 2011, Nature
SRR306739	Testis_Male1	Platypus	Brawand et al, 2011, Nature
SRR306740	Testis_Male2	Platypus	Brawand et al, 2011, Nature
SRR306749	Heart_Male1	Opossum	Brawand et al, 2011, Nature
SRR306750	Heart_Male2	Opossum	Brawand et al, 2011, Nature
SRR306754	Liver_Male	Opossum	Brawand et al, 2011, Nature
SRR306755	Testis_Male1	Opossum	Brawand et al, 2011, Nature
SRR306756	Testis_Male2	Opossum	Brawand et al, 2011, Nature
SRR5412219	ovary1	Opossum	Marin et al., 2017, Genome Research
SRR500913	ovary2	Opossum	Marin et al., 2017, Genome Research

## Sheet: S4
Supplemental Table S4: Data used for Timetree analysis (Figure 5A)
		% identical site
MY divergence from Human		H2A	H2AZ	macroHFD	H2A.X	H2A.1	H2A.B	H2A.P	H2B.1	CenH3-HFD	CenH3	macroH2A	H2A.Q
6.4	Chimp	95	100	100	100	100	97	99	100	100	99	100	98
19.43	Gibbon	95	100	99	96	99	93	91	97	97	96	96	97
28.1	Baboon	95	100	100	100	99	84.3	82.9	98	94	94	100	92
42.6	Marmoset/Night Monkey	92	100	100	100	94	59.5	76.1	94	85	73	100	89
73	Bushbaby/Mouse Lemur	95	100	100	98	98	64	48	94	87	84	99
88	Rat	99	100	100	99	92	53	67.8	93	75	63	98
94	Pig	98	100	100	99	98	62.6	42.7	94	79	77	99	33
102	Armadillo	95	100	82	99	94	68.7	36.7	94	79	76	65
		% identical site
MY divergence to Dog		H2A.L
47	Giant Panda	74
80	Horse	66
94	Squirrel	51
102	Armadillo	53
		% identical site
MY divergence to Tas Dev		H2A.R.1	H2A.R.2
78	Opossum	96	83
		H2A.Q
MY divergence		%identity	Species Pair
	5.7	100	Dromedary/Camel
	9.7	98	Sheep/Goat
	16.2	98	Antelope/Sheep
	20	97	Dromedary/Alpaca
	24	83	Bison/Sheep
	47	79	Dog/Walrus
	64.4	68	Camel/pig
	80	70	Dog/Horse
Final Table
	H2A	H2AZ	macroHFD	H2A.X	H2A.1	H2A.B	H2A.P	H2B.1	H2A.L	Variant 1	Variant 2	CenH3	H2A.Q
5.7													100
6.4	95	100	100	100	100	97	99	100				99
9.7													98
16.2													98
19.43	95	100	99	96	99	93	91	97				96
20													97
24													83
28.1	95	100	100	100	99	84.3	82.9	98				94
42.6	92	100	100	100	94	59.5	76.1	94				73
47									74				79
64.4													68
73	95	100	100	98	98	64	48	94				84
78										96	83
80									66				70
88	99	100	100	99	92	53	67.8	93				63
94	98	100	100	99	98	62.6	42.7	94	51			77
102	95	100	82	99	94	68.7	36.7	94	53			76

## Sheet: S5
Supplemental Table S5: Experimental details about PCR amplification and sequencing of primate H2A.P and H2A.B for PAML analyses.
Common species name	Scientific name	Coriell biorepository number
siamang	Hylobates syndactylus	fibroblast PR00722, and DNA KB11539
black-and-white colobus	Colobus guereza	fibroblast PR00980
talapoin	Miopithecus talapoin	fibroblast PR00716
woolly monkey	Lagothrix lagotricha	DNA NG05356
spider monkey	Ateles geoffroyi	DNA NG05352
white-faced saki	Pithecia pithecia	fibroblast PR00239, DNA KB5932
howler monkey	Alouatta sara	DNA OR749; FrozenZoo
H2A.B genes from talapoin, siamang gibbon and black and white colobus were amplified (45 cycles) using PCR high fidelity Super Mix from Invitrogen following the manufacturer's instructions. Primer sequences: B_F- GCTAGGATACACAGTACTGGACGCGG; B_R- GGTGGGTGGACGAGTGGACC.
H2A.B genes from spider monkey, howler monkey, woolly monkey and white-faced saki were amplified using nested PCR. 20 cycles using external primers were followed by 30 cycles with internal primers, using Taq DNA polymerase from Roche, following the manufacturer's instructions. Primer sequences: external_F–TGAGGGGCTGGGCCCTCGTCGCTAGGATACAC; external_R- CCAAGGCAAAGTGACTGAAACAGGCAG; internal_F-CTAGAG…
H2A.P sequences from white-faced saki and woolly monkey were amplified using Taq DNA polymerase from Roche, following the manufacturer's instructions. Primer sequences: P_flank_F- GAGACCTGCTCAAGCAGGAGAATCAAGC; P_flank_R- CCAAGGCAAAGTGACTGAAACAGGCAG.
